# Supplementary material for: Iron-catalyzed C–F bond silylation and borylation of fluoroarenes
Source: Royal Society of Chemistry journal article supplement (doi:10.1039/d1qo00839k), 2021-01-01

# Iron-Catalyzed C-F Bond Silylation and Borylation of Aryl Fluorides

## List of Contents

|                                                                            |    |
|----------------------------------------------------------------------------|----|
| General Information and Materials.....                                     | 1  |
| Optimization of Iron-Catalyzed Silylation of Aryl Fluorides.....           | 3  |
| Optimization of Iron-Catalyzed Borylation of Aryl Fluorides.....           | 6  |
| Mechanistic Studies.....                                                   | 11 |
| General Procedure for the Silylation and Borylation of Aryl Fluorides..... | 14 |
| Characterization Data for Products.....                                    | 15 |
| References.....                                                            | 32 |
| Spectra of Products <b>1-52</b> .....                                      | 33 |

**General information:**  $^1\text{H}$  NMR and  $^{13}\text{C}$  NMR spectra were recorded on Agilent 400MR DD2 (400 MHz) or 600MR DD2 (600 MHz) spectrometer at ambient temperature. Chemical shifts ( $\delta$ ) are reported in ppm, and coupling constants ( $J$ ) are in Hertz (Hz). The following abbreviations were used to explain the multiplicities: s = singlet, d = doublet, t = triplet, q = quartet, m = multiplet, sept = septet. NMR yield was determined by  $^1\text{H}$  NMR using mesitylene as an internal standard before working up the reaction.

**Materials:** All reagents that used were from commercial sources, unless otherwise specified.  $\text{Fe}(\text{OAc})_2$  (95%) was purchased from Sigma-Aldrich.  $t\text{-BuONa}$  (99%) was purchased from Adamas. Cyclohexane and DMF were distilled under reduced pressure from  $\text{CaH}_2$ . 1,4-dioxane, THF, MTBE,  $(i\text{-Pr})_2\text{O}$ , Xylene and toluene were distilled from sodium and benzophenone immediately before used.

## Optimization of Iron-Catalyzed Silylation of Aryl Fluorides (Table S1-S7):

**Table S1. Screening of Solvents.<sup>a</sup>**

| Entry | Solvent            | Yield <sup>b</sup> |
|-------|--------------------|--------------------|
| 1     | 1,4-dioxane        | 15%                |
| 2     | THF                | 18%                |
| 3     | <b>Cyclohexane</b> | <b>27%</b>         |
| 4     | Toluene            | 0%                 |
| 5     | DMF                | 0%                 |

<sup>a</sup>Reaction conditions (unless otherwise specified): **1a** (0.2 mmol, 1.0 equiv), **2aa** (3.5 equiv), Fe(OAc)<sub>2</sub> (10 mol%), *t*-BuONa (2.5 equiv), Solvent (1.0 mL), 130 °C, 12 h, under an argon atmosphere. <sup>b</sup>Determined by <sup>1</sup>H NMR using trichloromethane as an internal standard.

**Table S2. Screening of Bases.<sup>a</sup>**

| Entry | Base                            | Yield <sup>b</sup> |
|-------|---------------------------------|--------------------|
| 1     | K <sub>3</sub> PO <sub>4</sub>  | 0%                 |
| 2     | K <sub>2</sub> CO <sub>3</sub>  | 0%                 |
| 3     | Cs <sub>2</sub> CO <sub>3</sub> | 0%                 |
| 4     | <i>t</i> -BuOK                  | Trace              |
| 5     | <b><i>t</i>-BuONa</b>           | <b>27%</b>         |
| 6     | none                            | 0%                 |

<sup>a</sup>Reaction conditions (unless otherwise specified): **1a** (0.2 mmol, 1.0 equiv), **2aa** (3.5 equiv), Fe(OAc)<sub>2</sub> (10 mol%), Base (2.5 equiv), Cyclohexane (1.0 mL), 130 °C, 12 h, under an argon atmosphere. <sup>b</sup>Determined by <sup>1</sup>H NMR using trichloromethane as an internal standard.

**Table S3. Screening of Ligands.<sup>a</sup>**

| Entry | Ligand | Yield <sup>b</sup> |
|-------|--------|--------------------|
|-------|--------|--------------------|

|    |                             |            |
|----|-----------------------------|------------|
| 1  | XantPhos                    | 28%        |
| 2  | PPh <sub>3</sub>            | 34%        |
| 3  | SPhos                       | 31%        |
| 4  | <b>P(m-tol)<sub>3</sub></b> | <b>54%</b> |
| 5  | X-Phos                      | 27%        |
| 6  | DPPE                        | 43%        |
| 7  | DPPH                        | 36%        |
| 8  | DPEPhos                     | 34%        |
| 9  | DPPF                        | 42%        |
| 10 | TMEDA                       | 22%        |
| 11 | Bathophenanthroline         | 12%        |

<sup>a</sup>Reaction conditions (unless otherwise specified): **1a** (0.2 mmol, 1.0 equiv), **2aa** (3.5 equiv), Fe(OAc)<sub>2</sub> (10 mol%), *t*-BuONa (2.5 equiv), Cyclohexane (1.0 mL), 130 °C, 12 h, under an argon atmosphere. <sup>b</sup>Determined by <sup>1</sup>H NMR using trichloromethane as an internal standard.

**Table S4. Screening of the loading of 2aa.<sup>a</sup>**

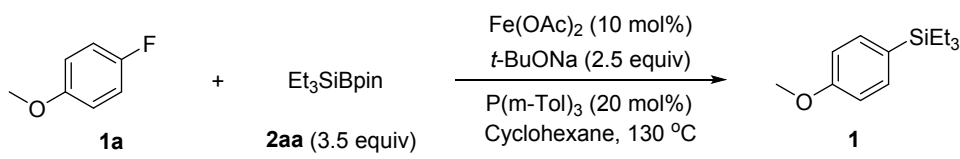

| Entry | Equiv      | Yield <sup>b</sup> |
|-------|------------|--------------------|
| 1     | 2.5        | 27%                |
| 2     | 3.0        | 46%                |
| 3     | 3.5        | 54%                |
| 4     | <b>4.0</b> | <b>64%</b>         |
| 5     | 4.5        | 60%                |
| 6     | 5.0        | 62%                |

<sup>a</sup>Reaction conditions (unless otherwise specified): **1a** (0.2 mmol, 1.0 equiv), **2aa** (X equiv), Fe(OAc)<sub>2</sub> (10 mol%), *t*-BuONa (2.5 equiv), Cyclohexane (1.0 mL), 130 °C, 12 h, under an argon atmosphere. <sup>b</sup>Determined by <sup>1</sup>H NMR using trichloromethane as an internal standard.

**Table S5. Screening of the Concentration.<sup>a</sup>**

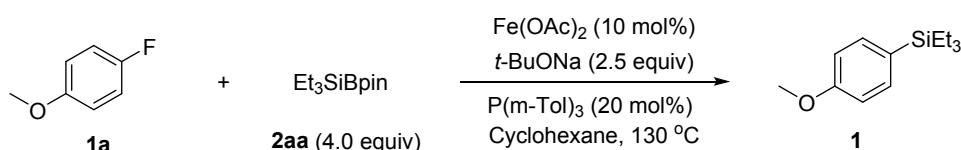

| Entry | Cyclohexane (X ml) | Yield <sup>b</sup> |
|-------|--------------------|--------------------|
|-------|--------------------|--------------------|

|   |            |                  |
|---|------------|------------------|
| 1 | 0.5        | 51%              |
| 2 | <b>0.8</b> | <b>72% (70%)</b> |
| 3 | 1.0        | 64%              |
| 4 | 1.2        | 58%              |
| 5 | 1.5        | 42%              |
| 6 | 2.0        | 28%              |

<sup>a</sup>Reaction conditions (unless otherwise specified): **1a** (0.2 mmol, 1.0 equiv), **2aa** (4.0 equiv), Fe(OAc)<sub>2</sub> (10 mol%), *t*-BuONa (2.5 equiv), Cyclohexane (X mL), 130 °C, 12 h, under an argon atmosphere. <sup>b</sup>Determined by <sup>1</sup>H NMR using trichloromethane as an internal standard.

**Table S6. Screening of Iron Sources.<sup>a</sup>**

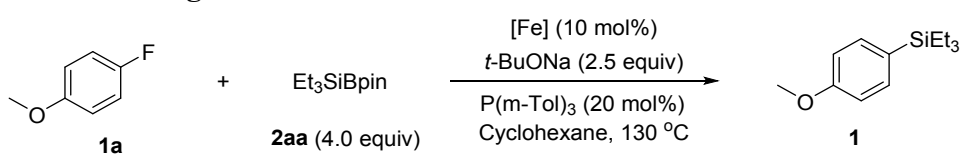

| Entry | [Fe]                       | Yield <sup>b</sup> |
|-------|----------------------------|--------------------|
| 1     | Fe(acac) <sub>3</sub>      | 62%                |
| 2     | FeCl <sub>2</sub>          | 0%                 |
| 3     | FeBr <sub>2</sub>          | Trace              |
| 4     | Ferric Stearate            | 51%                |
| 5     | Fe(acac) <sub>3</sub>      | 45%                |
| 6     | Fe(OTf) <sub>2</sub>       | 58%                |
| 7     | <b>Fe(OAc)<sub>2</sub></b> | <b>72% (70%)</b>   |

<sup>a</sup>Reaction conditions (unless otherwise specified): **1a** (0.2 mmol, 1.0 equiv), **2aa** (4.0 equiv), [Fe] (10 mol%), *t*-BuONa (2.5 equiv), Cyclohexane (0.8 mL), 130 °C, 12 h, under an argon atmosphere. <sup>b</sup>Determined by <sup>1</sup>H NMR using trichloromethane as an internal standard.

**Table S7. Screening of temperature.<sup>a</sup>**

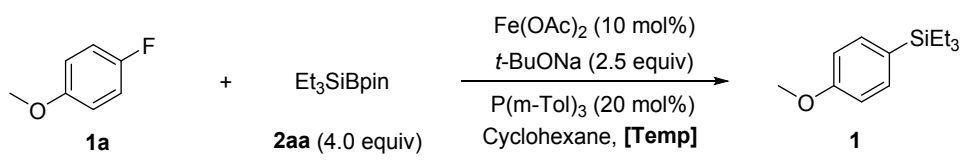

| Entry | [Temp]        | Yield <sup>b</sup> |
|-------|---------------|--------------------|
| 1     | 120 °C        | 63%                |
| 2     | 125 °C        | 65%                |
| 3     | 130 °C        | 72%                |
| 4     | <b>135 °C</b> | <b>(75%)</b>       |

5                      140 °C                      68%

<sup>a</sup>Reaction conditions (unless otherwise specified): **1a** (0.2 mmol, 1.0 equiv), **2a** (4.0 equiv), Fe(OAc)<sub>2</sub> (10 mol%), *t*-BuONa (2.5 equiv), Cyclohexane (0.8 mL), 12 h, under an argon atmosphere. <sup>b</sup>Determined by <sup>1</sup>H NMR using trichloromethane as an internal standard.

## Optimization of Iron-Catalyzed Borylation of Aryl Fluorides (Table S8-S13):

**Table S8. Screening of Solvents.<sup>a</sup>**

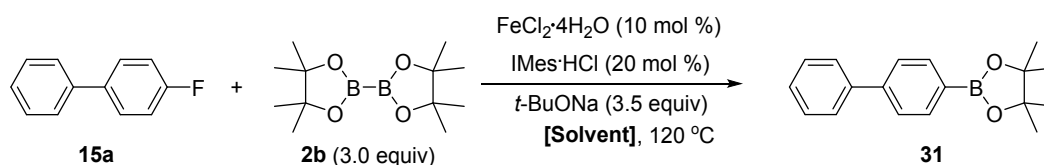

| Entry | Solvent         | Yield <sup>b</sup> |
|-------|-----------------|--------------------|
| 1     | 1,4-dioxane     | <b>12%</b>         |
| 2     | DME             | 6%                 |
| 3     | Cyclohexane     | 5%                 |
| 4     | Xylene          | Trace              |
| 5     | Isopropyl ether | Trace              |

<sup>a</sup>Reaction conditions (unless otherwise specified): **15a** (0.2 mmol, 1.0 equiv), **2b** (3.0 equiv), FeCl<sub>2</sub>·4H<sub>2</sub>O (10 mol%), *t*-BuONa (3.5 equiv), Solvent (2 mL), 120 °C, 12 h, under an argon atmosphere. <sup>b</sup>Determined by <sup>1</sup>H NMR using trichloromethane as an internal standard.

**Table S9. Screening of Bases.<sup>a</sup>**

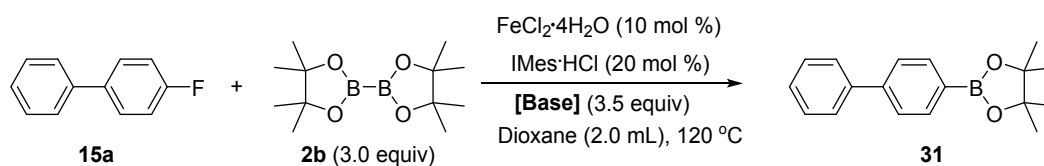

| Entry | [Base]                          | Yield <sup>b</sup> |
|-------|---------------------------------|--------------------|
| 1     | <i>t</i> -BuONa                 | <b>9%</b>          |
| 2     | <i>t</i> -BuOMg                 | 0%                 |
| 3     | KOMe                            | Trace              |
| 4     | Li <sub>2</sub> CO <sub>3</sub> | 0%                 |
| 5     | Na <sub>3</sub> PO <sub>4</sub> | 0%                 |
| 6     | CsOAc                           | 0%                 |
| 7     | KOAc                            | 0%                 |
| 8     | Cs <sub>2</sub> CO <sub>3</sub> | 0%                 |
| 9     | NaOAc                           | 0%                 |

|    |       |    |
|----|-------|----|
| 10 | CsF   | 0% |
| 11 | LiOAc | 0% |

<sup>a</sup>Reaction conditions (unless otherwise specified): **15a** (0.2 mmol, 1.0 equiv), **2b** (3.0 equiv), FeCl<sub>2</sub>·4H<sub>2</sub>O (10 mol%), Base (3.5 equiv), Dioxane (2.0 mL), 120 °C, 12 h, under an argon atmosphere. <sup>b</sup>Determined by <sup>1</sup>H NMR using trichloromethane as an internal standard.

**Table S10. Screening of Ligands and temperature.<sup>a</sup>**

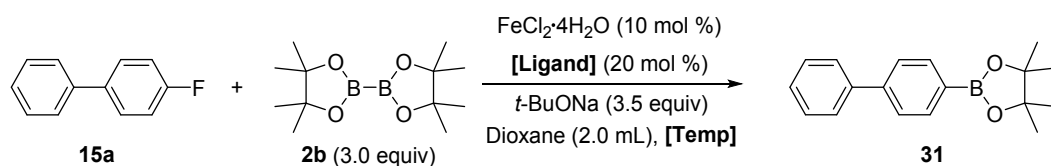

| Entry | ligand    | 120 °C | 130 °C | 140 °C |
|-------|-----------|--------|--------|--------|
| 1     | TMEDA     | 12%    | 21%    | 9%     |
| 2     | IMes·HCl  | 8%     | 11%    | 14%    |
| 3     | SIMes·HCl | 24%    | 37%    | 35%    |
| 4     | IPr·HCl   | 9%     | 21%    | 24%    |

<sup>a</sup>Reaction conditions (unless otherwise specified): **15a** (0.2 mmol, 1.0 equiv), **2b** (3.0 equiv), FeCl<sub>2</sub>·4H<sub>2</sub>O (10 mol%), *t*-BuONa (3.5 equiv), Dioxane (2.0 mL), T °C, 12 h, under an argon atmosphere. <sup>b</sup>Determined by <sup>1</sup>H NMR using trichloromethane as an internal standard.

**Table S11. Screening of Iron Sources.<sup>a</sup>**

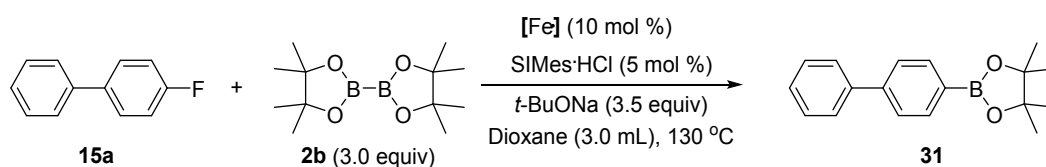

| Entry | [Fe]                                 | Yield <sup>b</sup> |
|-------|--------------------------------------|--------------------|
| 1     | FeI <sub>2</sub>                     | 11%                |
| 2     | Fe(OTf) <sub>2</sub>                 | 6%                 |
| 3     | FeCl <sub>2</sub> ·4H <sub>2</sub> O | 30%                |
| 4     | Fe(acac) <sub>3</sub>                | <b>46%</b>         |
| 5     | Fe(OAc) <sub>2</sub>                 | 22%                |
| 6     | FeBr <sub>2</sub>                    | 38%                |

<sup>a</sup>Reaction conditions (unless otherwise specified): **15a** (0.3 mmol, 1.0 equiv), **2b** (3.0 equiv), *t*-BuONa (3.5 equiv), Dioxane (3.0 mL), 130 °C, 12 h, under an argon atmosphere. <sup>b</sup>Determined by <sup>1</sup>H NMR using trichloromethane as an internal standard.

**Table S12. Screening of the Concentration.<sup>a</sup>**

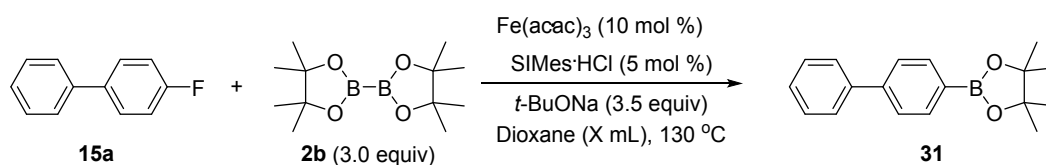

| Entry | Dioxane (mL) | Yield <sup>b</sup> |
|-------|--------------|--------------------|
| 1     | 1.5          | 48%                |
| 2     | 2.0          | <b>58%</b>         |
| 3     | 2.5          | 41%                |
| 4     | 3.0          | 46%                |

<sup>a</sup>Reaction conditions (unless otherwise specified): **15a** (0.3 mmol, 1.0 equiv), **2b** (3.0 equiv), Fe(acac)<sub>3</sub> (10 mol %), *t*-BuONa (3.5 equiv), Dioxane (X mL), 130 °C, 12 h, under an argon atmosphere. <sup>b</sup>Determined by <sup>1</sup>H NMR using trichloromethane as an internal standard.

**Table S13. Screening of the Loading of Base.<sup>a</sup>**

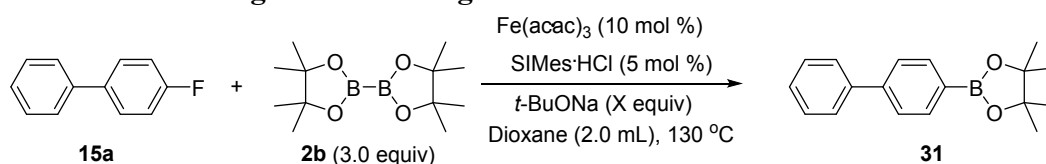

| Entry | <i>t</i> -BuONa (equiv) | Yield <sup>b</sup> |
|-------|-------------------------|--------------------|
| 1     | 3.5                     | 56%                |
| 2     | <b>4.0</b>              | <b>(71%)</b>       |
| 3     | 4.5                     | 49%                |
| 4     | 5.0                     | 26%                |
| 5     | 5.5                     | Trace              |
| 6     | 6.0                     | Trace              |

<sup>a</sup>Reaction conditions (unless otherwise specified): **15a** (0.3 mmol, 1.0 equiv), **2b** (3.0 equiv), Fe(acac)<sub>3</sub> (10 mol %), *t*-BuONa (X equiv), Dioxane (2.0 mL), 130 °C, 12 h, under an argon atmosphere. <sup>b</sup>Determined by <sup>1</sup>H NMR using trichloromethane as an internal standard.

**Table S14. Screening of Ligands Using 28a as the Substrate.<sup>a</sup>**

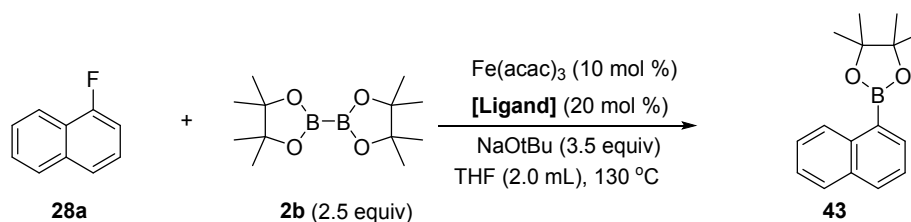



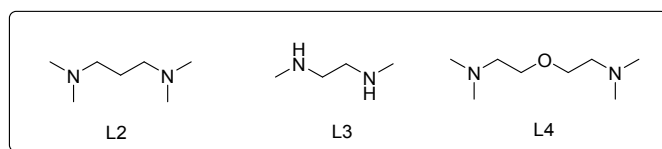

| Entry | Ligand | Yield <sup>b</sup> |
|-------|--------|--------------------|
| 1     | TMEDA  | 75%                |
| 2     | TMMDA  | 70%                |
| 3     | TEEDA  | 76%(71%)           |
| 4     | L3     | 55%                |
| 5     | L2     | 76%                |
| 6     | L4     | 79%(76%)           |

<sup>a</sup>Reaction conditions (unless otherwise specified): **28a** (0.3 mmol, 1.0 equiv), **2b** (2.5 equiv), Fe(acac)<sub>3</sub> (10 mol %), *t*-BuONa (3.5 equiv), THF (2.0 mL), 130 °C, 12 h, under an argon atmosphere. <sup>b</sup>Determined by <sup>1</sup>H NMR using trichloromethane as an internal standard.

**Table S15. Control Experiments.<sup>a</sup>**

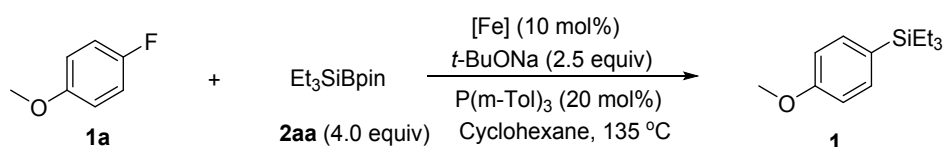

| Entry | [cat.]                        | Base             | Ligand                | Yield <sup>b</sup> |
|-------|-------------------------------|------------------|-----------------------|--------------------|
| 1     | Fe(OAc) <sub>2</sub>          | <i>t</i> -BuONa  | P(m-tol) <sub>3</sub> | 73%(75%)           |
| 2     | Fe(OAc) <sub>2</sub> (99.99%) | <i>t</i> - BuONa | P(m-tol) <sub>3</sub> | 73%                |
| 3     | Fe(OAc) <sub>2</sub>          | <i>t</i> - BuONa | -                     | 24%                |
| 4     | -                             | <i>t</i> - BuONa | P(m-tol) <sub>3</sub> | 3%                 |
| 5     | Fe(OAc) <sub>2</sub>          | -                | P(m-tol) <sub>3</sub> | -                  |
| 6     | Cu(OAc) <sub>2</sub> (5 mol%) | <i>t</i> -BuONa  | P(m-tol) <sub>3</sub> | 8%                 |
| 7     | Cu(OAc) <sub>2</sub> (1 mol%) | <i>t</i> - BuONa | P(m-tol) <sub>3</sub> | 2%                 |
| 8     | Pd(OAc) <sub>2</sub> (5 mol%) | <i>t</i> -BuONa  | P(m-tol) <sub>3</sub> | 45%                |
| 9     | Ni(OAc) <sub>2</sub> (5 mol%) | <i>t</i> -BuONa  | P(m-tol) <sub>3</sub> | 22%                |

<sup>a</sup>Reaction conditions (unless otherwise specified): **1a** (0.2 mmol, 1.0 equiv), **2aa** (3.5 equiv), *t*-BuONa (2.5 equiv), Cyclohexane (0.8 mL), 135 °C, 12 h, under an argon atmosphere. <sup>b</sup>Determined by <sup>1</sup>H NMR using trichloromethane as an internal standard.

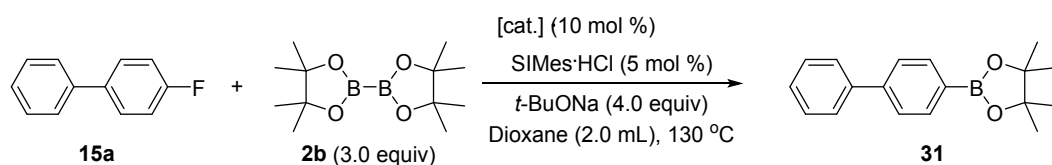

| Entry | [cat.]                         | Base            | Ligand    | Yield <sup>b</sup> |
|-------|--------------------------------|-----------------|-----------|--------------------|
| 1     | Fe(acac) <sub>3</sub>          | <i>t</i> -BuONa | SIMes·HCl | (71%)              |
| 2     | Fe(acac) <sub>3</sub> (99.99%) | <i>t</i> -BuONa | SIMes·HCl | 70%                |
| 3     | Fe(acac) <sub>3</sub>          | <i>t</i> -BuONa | -         | 20%                |
| 4     | -                              | <i>t</i> -BuONa | SIMes·HCl | -                  |
| 5     | Fe(acac) <sub>3</sub>          | -               | SIMes·HCl | -                  |
| 6     | Cu(OAc) <sub>2</sub>           | <i>t</i> -BuONa | SIMes·HCl | 20%                |
| 7     | Cu(OTf) <sub>2</sub>           | <i>t</i> -BuONa | SIMes·HCl | -                  |
| 8     | Pd(OAc) <sub>2</sub>           | <i>t</i> -BuONa | SIMes·HCl | 45%                |
| 9     | Ni(OAc) <sub>2</sub>           | <i>t</i> -BuONa | SIMes·HCl | 10%                |
| 10    | CuBr <sub>2</sub>              | <i>t</i> -BuONa | SIMes·HCl | -                  |

<sup>a</sup>Reaction conditions (unless otherwise specified): **15a** (0.3 mmol, 1.0 equiv), **2b** (3.0 equiv), *t*-BuONa (4.0 equiv), Dioxane (2.0 mL), 130 °C, 12 h, under an argon atmosphere. <sup>b</sup>Determined by <sup>1</sup>H NMR using trichloromethane as an internal standard.

**Table S16. Evaluation of Trace Metals Present in Commercial Iron Sources.**

| Trace-metal analysis: Fe(OAc) <sub>2</sub> (99.99%), Alfa Aesar |                     |
|-----------------------------------------------------------------|---------------------|
| Element                                                         | Molar Concentration |
| Cu                                                              | <0.66 ppm           |
| Pd                                                              | <0.16 ppm           |
| Ni                                                              | <0.67 ppm           |

## Mechanistic Studies

**Table S17. Radical Inhibition Experiments of Iron-Catalyzed Silylation of 1a and Borylation of 15a.<sup>a</sup>**

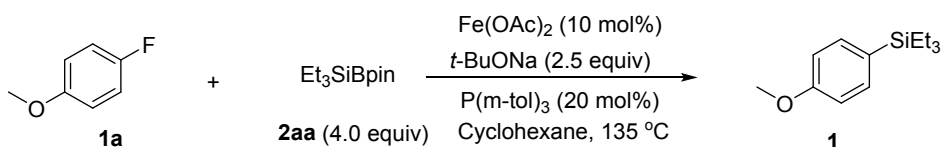

| Entry | Additive (equiv) | Yield <sup>b</sup> |
|-------|------------------|--------------------|
| 1     | none             | (75%)              |
| 2     | TEMPO (1.0)      | 22%                |
| 3     | BHT (1.0)        | 20%                |

<sup>a</sup>Reaction conditions (unless otherwise specified): **1a** (0.2 mmol, 1.0 equiv), **2aa** (4.0 equiv), Fe(OAc)<sub>2</sub> (10 mol%), *t*-BuONa (2.5 equiv), Cyclohexane (0.8 mL), 135 °C, 12 h, under an argon atmosphere. <sup>b</sup>Determined by <sup>1</sup>H NMR using trichloromethane as an internal standard.

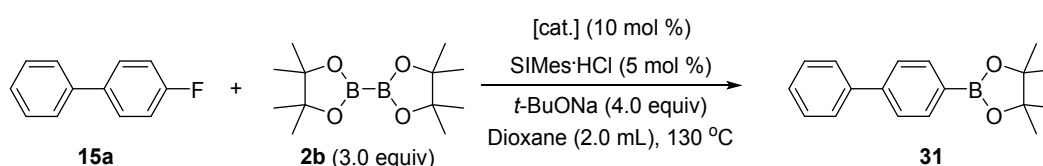

| Entry | Additive (equiv) | Yield <sup>b</sup> |
|-------|------------------|--------------------|
| 1     | none             | (71%)              |
| 2     | TEMPO (1.0)      | 48%                |
| 3     | BHT (1.0)        | 41%                |

<sup>a</sup>Reaction conditions (unless otherwise specified): **1a** (0.2 mmol, 1.0 equiv), **2aa** (4.0 equiv), Fe(OAc)<sub>2</sub> (10 mol%), *t*-BuONa (2.5 equiv), Cyclohexane (0.8 mL), 135 °C, 12 h, under an argon atmosphere. <sup>b</sup>Determined by <sup>1</sup>H NMR using trichloromethane as an internal standard.

Drastically diminished yields were observed when one equivalent of radical scavenger TEMPO, or radical inhibitor BHT was added under the standard silylation and borylation reaction conditions, indicating that a radical pathway might be involved.

### Competitive experiment.<sup>a</sup>

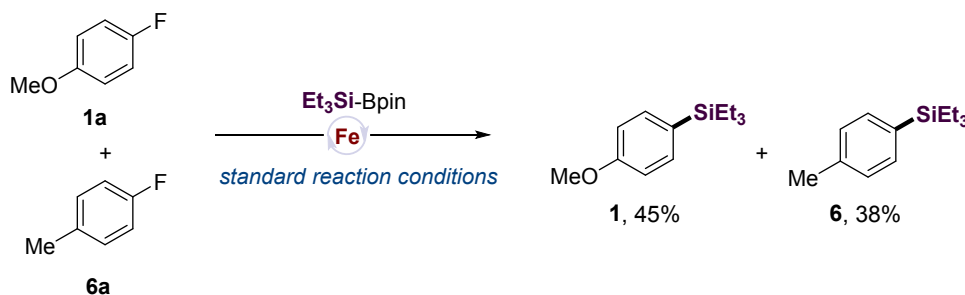

A better yield (45%) could be obtained using electron-rich **1a** as a substrate. Thus, these results indicate that this iron-catalyzed silylation is unlikely to occur through the  $S_NAr$  mechanism.

## Control Experiments

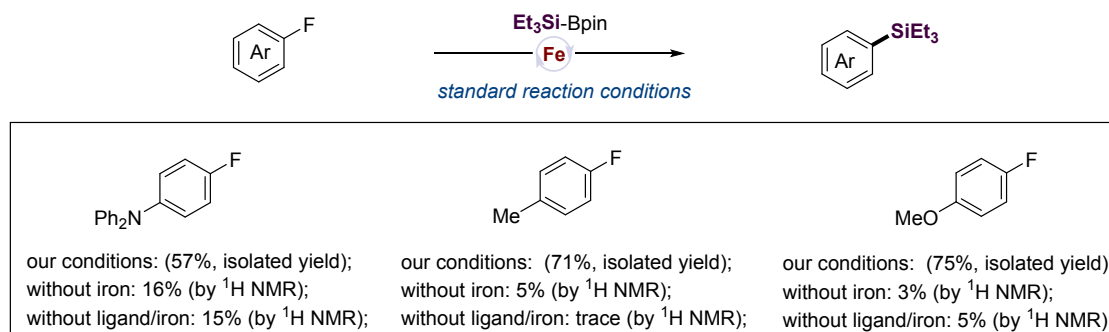

Some substrates with different electronic properties were chosen to conduct the control experiments. As shown, the desired products were only obtained in trace to 16% yield without iron. Therefore, these results suggest that this transformation is promoted by iron catalysis.

## XPS Experiments

In order to gain further insight into the iron-catalyzed C-F bond activation reaction, the X-ray photoelectron spectroscopy (XPS) analysis was conducted below.

### X-Ray Photoelectron Spectroscopy (XPS) Analysis of Aryl Fluoride

**Procedure:** A 25 mL flame-dried Schlenk tube equipped with a magnetic stir bar was charged with  $Fe(OAc)_2$  (3.5 mg, 0.02 mmol, 0.1 equiv),  $P(m\text{-tol})_3$  (12 mg, 0.04 mmol, 0.2 equiv),  $t\text{-BuONa}$  (48.1 mg, 0.5 mmol, 2.5 equiv) in glove box. Aryl Fluoride **1a** (0.2 mmol), fresh distilled silylborane **2aa** (4.0 equiv), fresh distilled cyclohexane (0.8 mL) were then added under nitrogen atmosphere. The reaction mixture was allowed to stir at 135 °C in oil bath for 1 h via heating mantle. Then, the reaction was cooled to

room temperature and concentrated under N<sub>2</sub>. The resulting mixture was analyzed by X-ray photoelectron spectroscopy (XPS).

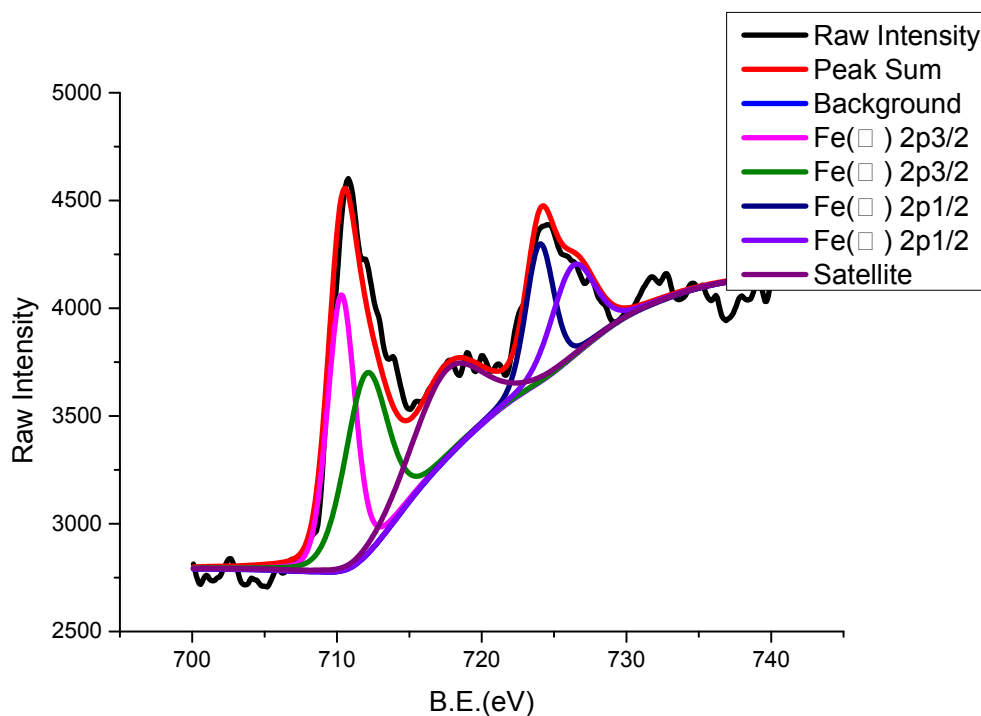

| Peak | Position (eV) | Area     | FWHM (eV) | %GL |
|------|---------------|----------|-----------|-----|
| 0    | 710.300       | 3362.000 | 2.250     | 20  |
| 1    | 712.000       | 3434.000 | 3.490     | 20  |
| 2    | 724.000       | 1681.000 | 2.250     | 20  |
| 3    | 726.300       | 1717.000 | 3.490     | 20  |
| 4    | 717.565       | 2727.513 | 5.689     | 20  |

**X-Ray Photoelectron spectroscopy (XPS) analysis of the reaction mixture of Fe(OAc)<sub>2</sub>, *t*-BuONa, 1a and Et<sub>3</sub>SiBpin.**

**Conclusion:** When we studied the X-ray photoelectron spectroscopy (XPS) analysis of the reaction mixture of Fe(OAc)<sub>2</sub>, *t*-BuONa and Et<sub>3</sub>SiBpin. The experiments showed that peak corresponding to Fe<sup>II</sup> 2p<sub>3/2</sub> was observed with the binding energy at 710.3 eV (compared with FeO).<sup>15</sup> What's more, when the reaction mixture under standard reaction condition was analyzed by XPS, both Fe<sup>II</sup> 2p<sub>3/2</sub> and Fe<sup>III</sup> 2p<sub>3/2</sub> were found with the binding energy at 710.3 eV (compared with FeO) and 712.0 eV (compared with

FePO<sub>4</sub>).<sup>16</sup> Thus, these results demonstrated that Fe<sup>II</sup> and Fe<sup>III</sup> species might be involved in the catalytic cycle.

#### **General Procedure for the Silylation and Borylation of Aryl Fluorides:**

**Procedure for the silylation of aryl fluorides:** A 25 mL flame-dried Schlenk tube equipped with a magnetic stir bar was charged with Fe(OAc)<sub>2</sub> (3.5 mg, 0.02 mmol, 0.1 equiv), P(m-tol)<sub>3</sub> (12 mg, 0.04 mmol, 0.2 equiv), *t*-BuONa (48.1 mg, 0.5 mmol, 2.5 equiv) in glove box. Aryl Fluorides (0.2 mmol), fresh distilled silylborane **2aa** (4.0 equiv), fresh distilled cyclohexane (0.8 mL) were then added under nitrogen atmosphere. The reaction mixture was allowed to stir at 135 °C in oil bath for 12 h. The cooled solution was quenched with saturated NH<sub>4</sub>Cl aqueous solution, then diluted with ethyl acetate and washed with brine. The organic phase was dried over Na<sub>2</sub>SO<sub>4</sub> and concentrated in vacuo. The residue was purified by silica gel chromatography to afford the corresponding compound.

**Procedure for the borylation of aryl fluorides:** A 25 mL flame-dried Schlenk tube equipped with a magnetic stir bar was charged with Fe(acac)<sub>3</sub> (10.6 mg, 0.03 mmol, 0.1 equiv), SIMes·HCl (5.3 mg, 0.015 mmol, 0.05 equiv), *t*-BuONa (115.4 mg, 1.2 mmol, 4.0 equiv) in glove box. Aryl Fluorides (0.3 mmol), Bis(pinacolato)diboron **2b** (228.5 mg, 3.0 equiv), fresh distilled dioxane (2.0 mL) were then added under nitrogen atmosphere. The reaction mixture was allowed to stir at 130 °C in oil bath for 12 h. The cooled solution was quenched with saturated NH<sub>4</sub>Cl aqueous solution, then diluted with ethyl acetate and washed with brine. The organic phase was dried over Na<sub>2</sub>SO<sub>4</sub> and concentrated in vacuo. The residue was purified by silica gel chromatography to afford the corresponding compound.

#### **Other unsuccessful aryl fluorides:**

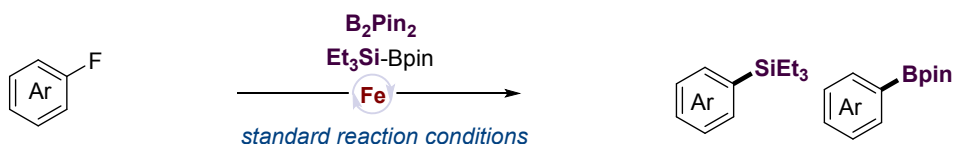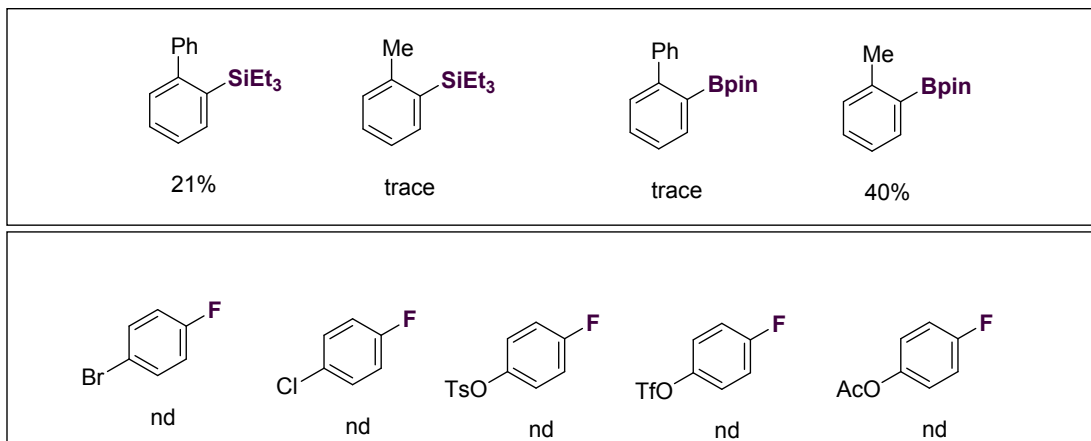

### Characterization Data for Products.

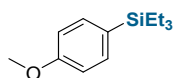

**Triethyl(4-methoxyphenyl)silane (1).** This compound is known<sup>3</sup>. The product **1** (33.3 mg, 75% yield) as a colourless oil was purified with silica gel chromatography. <sup>1</sup>H NMR (400 MHz, CDCl<sub>3</sub>) δ 7.43 (d, *J* = 8.0 Hz, 2 H), 6.93 (d, *J* = 8.0 Hz, 2 H), 3.82 (s, 3 H), 0.97 (t, *J* = 7.9 Hz, 9 H), 0.78 (q, *J* = 7.9 Hz, 6 H). <sup>13</sup>C NMR (100 MHz, CDCl<sub>3</sub>) δ 160.3, 135.7, 128.3, 113.6, 55.1, 7.6, 3.6.

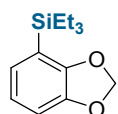

**Benzo[d][1,3]dioxol-4-yltriethylsilane (2).** This compound is unknown. The product **2** (33 mg, 70% yield) as a colourless oil was purified with silica gel chromatography. <sup>1</sup>H NMR (400 MHz, CDCl<sub>3</sub>) δ 6.86-6.81 (m, 3 H), 5.90 (s, 2 H), 0.97 (t, *J* = 7.6 Hz, 9 H), 0.82 (q, *J* = 7.6 Hz, 6 H). <sup>13</sup>C NMR (100 MHz, CDCl<sub>3</sub>) δ 152.5, 146.0, 127.3, 121.3, 116.9, 109.3, 100.0, 7.5, 3.4. FTMS (EI): Calculated for C<sub>13</sub>H<sub>20</sub>O<sub>2</sub>Si [M]<sup>+</sup>: 236.12271; Found: 236.12272.

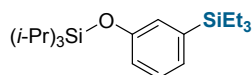

**triethyl(3-((triisopropylsilyl)oxy)phenyl)silane (3).** This compound is unknown. The product **3** (44.4 mg, 61% yield) as a colourless oil was purified with silica gel chromatography.  $^1\text{H}$  NMR (400 MHz,  $\text{CDCl}_3$ )  $\delta$  7.21 (t,  $J = 7.6$  Hz, 1 H), 7.05 (d,  $J = 7.2$  Hz, 1 H), 7.02 (s, 1 H), 6.88 (m, 1 H), 1.33-1.19 (m, 3 H), 1.11 (d,  $J = 7.4$  Hz, 18 H), 0.96 (t,  $J = 7.9$  Hz, 9 H), 0.78 (q,  $J = 7.9$  Hz, 6 H).  $^{13}\text{C}$  NMR (100 MHz,  $\text{CDCl}_3$ )  $\delta$  155.6, 139.0, 128.9, 126.9, 125.6, 120.6, 18.1, 12.9, 7.5, 3.5. FTMS (EI): Calculated for  $\text{C}_{13}\text{H}_{20}\text{O}_2\text{Si}$  ( $\text{M}-\text{C}_3\text{H}_7$ ) $^+$ : 321.2070; Found: 321.2063.

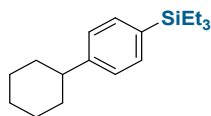

**(4-Cyclohexylphenyl)triethylsilane (4).** This compound is known<sup>10</sup>. The product **4** (41.6 mg, 76% yield) as a colourless oil was purified with silica gel chromatography.  $^1\text{H}$  NMR (400 MHz,  $\text{CDCl}_3$ )  $\delta$  7.43 (d,  $J = 8.0$  Hz, 2 H), 7.21 (d,  $J = 8.0$  Hz, 2 H), 2.50 (m, 1 H), 1.95-1.81 (m, 4 H), 1.80-1.73 (m, 1 H), 1.50-1.35 (m, 5 H), 0.98 (t,  $J = 7.6$  Hz, 9 H), 0.80 (q,  $J = 7.6$  Hz, 6 H).  $^{13}\text{C}$  NMR (100 MHz,  $\text{CDCl}_3$ )  $\delta$  148.7, 134.4, 126.4, 44.6, 34.5, 27.1, 26.3, 7.6, 3.6.

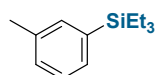

**Triethyl(*m*-tolyl)silane (5).** This compound is known<sup>2</sup>. The product **5** (34.2 mg, 0.2 mmol, 83% yield) as a colourless oil was purified with silica gel chromatography.  $^1\text{H}$  NMR (400 MHz,  $\text{CDCl}_3$ )  $\delta$  7.34-7.29 (m, 2 H), 7.29-7.23 (m, 1 H), 7.22-7.15 (m, 1 H), 2.38 (s, 3 H), 0.99 (t,  $J = 7.8$  Hz, 9 H), 0.80 (q,  $J = 7.8$  Hz, 6 H).  $^{13}\text{C}$  NMR (100 MHz,  $\text{CDCl}_3$ )  $\delta$  137.3, 136.9, 134.9, 131.2, 129.5, 127.6, 21.6, 7.4, 3.4.

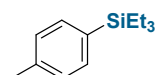

**Triethyl(*p*-tolyl)silane (6).** This compound is known<sup>3</sup>. The product **6** (29.3 mg, 0.2 mmol, 71% yield) as a colourless oil was purified with silica gel chromatography.  $^1\text{H}$  NMR (400 MHz,  $\text{CDCl}_3$ )  $\delta$  7.40 (d,  $J = 7.6$  Hz, 2 H), 7.18 (d,  $J = 7.6$  Hz, 2 H), 2.36 (s,



3 H), 0.96 (t,  $J = 7.9$  Hz, 9 H), 0.78 (q,  $J = 7.9$  Hz, 6 H).  $^{13}\text{C}$  NMR (100 MHz,  $\text{CDCl}_3$ )  $\delta$  138.6, 134.4, 133.8, 128.7, 21.6, 7.6, 3.5.

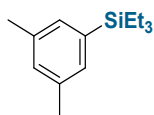

**(3,5-Dimethylphenyl)triethylsilane (7).** This compound is known<sup>10</sup>. The product **7** (33.9 mg, 77% yield) as a colourless oil was purified with silica gel chromatography.  $^1\text{H}$  NMR (400 MHz,  $\text{CDCl}_3$ )  $\delta$  7.09 (s, 2 H), 7.00 (s, 1 H), 2.32 (s, 6 H), 0.97 (t,  $J = 7.8$  Hz, 9 H), 0.78 (q,  $J = 7.8$  Hz, 6 H).  $^{13}\text{C}$  NMR (100 MHz,  $\text{CDCl}_3$ )  $\delta$  137.3, 137.0, 132.0, 130.7, 21.6, 7.6, 3.5.

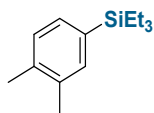

**3,4-Dimethyl-1-(triethylsilyl)benzene (8).** This compound is known<sup>2</sup>. The product **8** (28.6 mg, 65% yield) as a colourless oil was purified with silica gel chromatography.  $^1\text{H}$  NMR (400 MHz,  $\text{CDCl}_3$ )  $\delta$  7.25-7.22 (m, 2 H), 7.13 (d,  $J = 7.2$  Hz, 1 H), 2.27 (s, 3 H), 2.26 (s, 3 H), 0.96 (t,  $J = 7.8$  Hz, 9 H), 0.77 (q,  $J = 7.8$  Hz, 6 H).  $^{13}\text{C}$  NMR (100 MHz,  $\text{CDCl}_3$ )  $\delta$  137.4, 135.9, 135.6, 134.4, 132.0, 129.2, 29.9, 19.9, 7.6, 3.5.

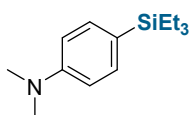

***N,N*-dimethyl-4-(triethylsilyl)aniline (9).** This compound is known<sup>2</sup>. The product **9** (30.5 mg, 65% yield) as a yellow oil was purified with silica gel chromatography.  $^1\text{H}$  NMR (400 MHz,  $\text{CDCl}_3$ )  $\delta$  7.38 (d,  $J = 8.4$  Hz, 2 H), 6.75 (d,  $J = 8.4$  Hz, 2 H), 2.97 (s, 6 H), 0.97 (t,  $J = 7.8$  Hz, 9 H), 0.76 (q,  $J = 7.8$  Hz, 6 H).  $^{13}\text{C}$  NMR (100 MHz,  $\text{CDCl}_3$ )  $\delta$  150.9, 135.4, 122.4, 112.0, 40.3, 7.7, 3.7.

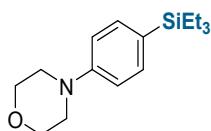

**4-(4-(triethylsilyl)phenyl)morpholine (10).** This compound is known<sup>7</sup>. The product **10** (44.3 mg, 80% yield) as a colourless oil was purified with silica gel chromatography. <sup>1</sup>H NMR (400 MHz, CDCl<sub>3</sub>) δ 7.41 (d, *J* = 7.4 Hz, 2 H) 6.91 (d, *J* = 7.4 Hz, 2 H), 4.03-3.62 (m, 4 H), 3.37-2.91 (m, 4 H), 0.97 (t, *J* = 7.8 Hz, 9 H), 0.77 (q, *J* = 7.8 Hz, 6 H). <sup>13</sup>C NMR (100 MHz, CDCl<sub>3</sub>) δ 151.6, 135.5, 127.0, 114.8, 67.1, 48.8, 7.6, 3.7.

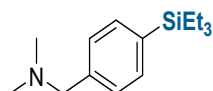

**N,N-dimethyl-1-(4-(triethylsilyl)phenyl)methanamine (11).** The product **11** (38.3 mg, 77% yield) as a colourless oil was purified with silica gel chromatography. <sup>1</sup>H NMR (400 MHz, CDCl<sub>3</sub>) δ 7.46 (d, *J* = 7.6 Hz, 2 H) 7.32 (d, *J* = 7.6 Hz, 2 H), 3.55 (s, 2 H), 2.34 (s, 6 H), 0.96 (t, *J* = 7.8 Hz, 9 H), 0.87-0.74 (m, 6 H). <sup>13</sup>C NMR (100 MHz, CDCl<sub>3</sub>) δ 138.6, 136.4, 134.4, 128.7, 64.3, 45.3, 7.5, 3.5.

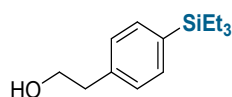

**2-(4-(triethylsilyl)phenyl)ethan-1-ol (12).** This compound is unknown. The product **12** (16.5 mg, 35% yield) as a colourless oil was purified with silica gel chromatography. <sup>1</sup>H NMR (400 MHz, CDCl<sub>3</sub>) δ 7.45 (d, *J* = 7.6 Hz, 2 H), δ 7.22 (d, *J* = 7.6 Hz, 2 H), 3.88 (t, *J* = 6.8 Hz, 2 H), 2.87 (t, *J* = 6.8 Hz, 2 H), 0.96 (t, *J* = 7.8 Hz, 9 H), 0.78 (q, *J* = 7.8 Hz, 6 H). <sup>13</sup>C NMR (100 MHz, CDCl<sub>3</sub>) δ 139.0, 135.4, 134.7, 128.6, 63.7, 39.3, 7.6, 3.5. FTMS (EI): Calculated for C<sub>12</sub>H<sub>19</sub>OSi (M-C<sub>2</sub>H<sub>5</sub>)<sup>+</sup>: 207.11997; Found: 207.11959.

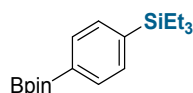

**triethyl(4-(4,4,5,5-tetramethyl-1,3,2-dioxaborolan-2-yl)phenyl)silane (13).** This compound is known<sup>1</sup>. The product **13** (41.3 mg, 65% yield) as a yellow solid was purified with silica gel chromatography. <sup>1</sup>H NMR (400 MHz, CDCl<sub>3</sub>) δ 7.78 (d, *J* = 7.6 Hz, 2 H), 7.50 (d, *J* = 7.6 Hz, 2 H), 1.34 (s, 12 H), 0.95 (t, *J* = 7.6 Hz, 9 H), 0.79 (q, *J* = 7.6 Hz, 6 H). <sup>13</sup>C NMR (100 MHz, CDCl<sub>3</sub>) δ 141.4, 133.9, 133.7, 83.9, 25.0, 7.5, 3.4.

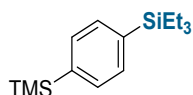

**triethyl(4-(trimethylsilyl)phenyl)silane (14).** This compound is known<sup>11</sup>. The product **14** (38 mg, 72% yield) as a colourless oil was purified with silica gel chromatography. <sup>1</sup>H NMR (400 MHz, CDCl<sub>3</sub>) δ 7.53-7.48 (m, 4 H), 0.98 (t, *J* = 7.8 Hz, 9 H), 0.80 (q, *J* = 7.8 Hz, 6 H), 0.28 (s, 9 H). <sup>13</sup>C NMR (100 MHz, CDCl<sub>3</sub>) δ 140.9, 138.1, 133.6, 132.7, 7.6, 3.5, 1.0.

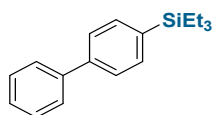

**[1,1'-biphenyl]-4-yltriethylsilane (15).** This compound is known<sup>2</sup>. The product **15** (45.6 mg, 85% yield) as a colourless oil was purified with silica gel chromatography. <sup>1</sup>H NMR (400 MHz, CDCl<sub>3</sub>) δ 7.64-7.57 (m, 6 H), 7.45 (t, *J* = 7.6 Hz, 2 H), 7.36 (t, *J* = 7.2 Hz, 1 H), 1.02 (t, *J* = 7.8 Hz, 9 H), 0.84 (q, *J* = 7.8 Hz, 6 H). <sup>13</sup>C NMR (100 MHz, CDCl<sub>3</sub>) δ 141.5, 141.3, 136.3, 134.8, 128.9, 127.4, 127.3, 126.5, 7.6, 3.5.

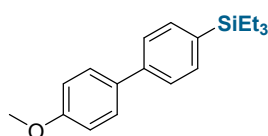

**Triethyl(4'-methoxy-[1,1'-biphenyl]-4-yl)silane (16).** This compound is known<sup>5</sup>. The product **16** (57.8 mg, 97% yield) as a colourless oil was purified with silica gel chromatography. <sup>1</sup>H NMR (400 MHz, CDCl<sub>3</sub>) δ 7.59-7.51 (m, 6 H), 7.03 – 6.92 (m, 2 H), 3.86 (s, 3 H), 1.00 (t, *J* = 7.8 Hz, 9 H), 0.82 (q, *J* = 7.8 Hz, 6 H). <sup>13</sup>C NMR (100 MHz, CDCl<sub>3</sub>) δ 159.3, 141.1, 135.6, 134.8, 133.8, 128.3, 126.1, 114.3, 55.5, 7.6, 3.5.

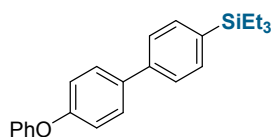

**Triethyl(4'-phenoxy-[1,1'-biphenyl]-4-yl)silane (17).** This compound is known<sup>7</sup>. The

product **17** (39.6 mg, 55% yield) as a colourless oil was purified with silica gel chromatography.  $^1\text{H}$  NMR (400 MHz,  $\text{CDCl}_3$ )  $\delta$  7.60-7.58 (m, 6 H), 7.38 (m, 2 H), 7.14 (m, 1 H), 7.11-7.08 (m, 4 H), 1.02 (t,  $J = 7.8$  Hz, 9 H), 0.85 (q,  $J = 7.8$  Hz, 6 H).  $^{13}\text{C}$  NMR (100 MHz,  $\text{CDCl}_3$ )  $\delta$  157.2, 157.0, 140.8, 136.3, 136.1, 134.9, 129.9, 128.5, 126.3, 123.5, 119.2, 119.1, 7.6, 3.5.

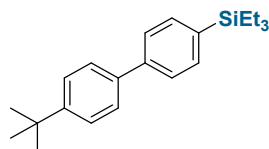

**(4'-(Tert-butyl)-[1,1'-biphenyl]-4-yl)triethylsilane (18)**. This compound is known<sup>4</sup>. The product **18** (59.6 mg, 92% yield) as a colourless oil was purified with silica gel chromatography.  $^1\text{H}$  NMR (400 MHz,  $\text{CDCl}_3$ )  $\delta$  7.60-7.56 (m, 6 H), 7.49-7.46 (m, 2 H), 1.39 (s, 9 H), 1.02 (t,  $J = 7.8$  Hz, 9 H), 0.85 (q,  $J = 7.8$  Hz, 6 H).  $^{13}\text{C}$  NMR (100 MHz,  $\text{CDCl}_3$ )  $\delta$  150.4, 141.4, 138.4, 136.0, 134.8, 126.9, 126.4, 125.8, 34.7, 31.5, 7.6, 3.6.

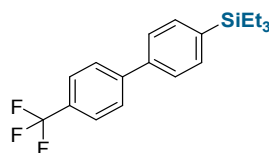

**Triethyl(4'-(trifluoromethyl)-[1,1'-biphenyl]-4-yl)silane (19)**. This compound is known<sup>7</sup>. The product **19** (28.2 mg, 42% yield) as a colourless oil was purified with silica gel chromatography.  $^1\text{H}$  NMR (400 MHz,  $\text{CDCl}_3$ )  $\delta$  7.73-7.68 (m, 4 H), 7.62-7.57 (m, 4 H), 1.00 (t,  $J = 7.6$  Hz, 9 H), 0.83 (q,  $J = 7.6$  Hz, 6 H).  $^{13}\text{C}$  NMR (100 MHz,  $\text{CDCl}_3$ )  $\delta$  144.8, 138.9 (q,  $J_{\text{CF}} = 228.0$  Hz), 135.0, 129.5 (q,  $J_{\text{CF}} = 32.0$  Hz), 127.5, 126.5, 125.8 (q,  $J_{\text{CF}} = 4.0$  Hz), 123.1, 7.6, 3.5.

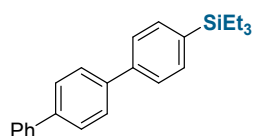

**[1,1':4',1''-terphenyl]-4-yltriethylsilane (20)**. This compound is unknown. The product **20** (42.7 mg, 62% yield) as a white solid was purified with silica gel

chromatography.  $^1\text{H}$  NMR (400 MHz,  $\text{CDCl}_3$ )  $\delta$  7.69 (s, 4 H), 7.67-7.61 (m, 4 H), 7.59-7.55 (m, 2 H), 7.47-7.42 (m, 2 H), 7.40-7.36 (m, 1 H), 1.00 (t,  $J = 7.8$  Hz, 9 H), 0.83 (q,  $J = 7.8$  Hz, 6 H).  $^{13}\text{C}$  NMR (100 MHz,  $\text{CDCl}_3$ )  $\delta$  150.1, 141.0, 140.8, 140.2, 140.2, 136.5, 134.9, 129.0, 127.6, 127.5, 127.2, 126.4, 7.6, 3.5. FTMS (EI): Calculated for  $\text{C}_{24}\text{H}_{28}\text{Si}$  (M) $^+$ : 344.19548; Found: 344.19459.

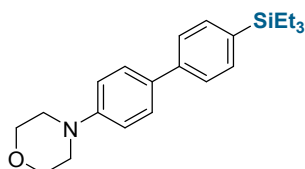

**4-(4'-(triethylsilyl)-[1,1'-biphenyl]-4-yl)morpholine (21).** This compound is known<sup>5</sup>. The product **21** (42.4 mg, 60% yield) as a colourless oil was purified with silica gel chromatography.  $^1\text{H}$  NMR (400 MHz,  $\text{CDCl}_3$ )  $\delta$  7.60-7.50 (m, 6 H), 6.99 (d,  $J = 8.4$  Hz, 2 H), 3.93-3.84 (m, 4 H), 3.27-3.18 (m, 4 H), 1.01 (t,  $J = 7.8$  Hz, 9 H), 0.83 (q,  $J = 7.8$  Hz, 6 H).  $^{13}\text{C}$  NMR (100 MHz,  $\text{CDCl}_3$ )  $\delta$  150.6, 141.1, 135.4, 134.8, 132.7, 127.9, 125.9, 115.8, 67.0, 49.2, 7.6, 3.5.

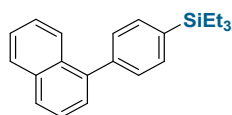

**Triethyl(4-(naphthalen-1-yl)phenyl)silane (22).** This compound is known<sup>10</sup>. The product **22** (40.7 mg, 64% yield) as a white solid was purified with silica gel chromatography.  $^1\text{H}$  NMR (400 MHz,  $\text{CDCl}_3$ )  $\delta$  7.98 (d,  $J = 8.4$  Hz, 1 H), 7.93 (d,  $J = 8.4$  Hz, 1 H), 7.88 (d,  $J = 8.4$  Hz, 1 H), 7.64-7.62 (m, 2 H), 7.57-7.44 (m, 6 H), 1.07 (t,  $J = 7.8$  Hz, 9 H), 0.89 (q,  $J = 7.8$  Hz, 6 H).  $^{13}\text{C}$  NMR (100 MHz,  $\text{CDCl}_3$ ):  $\delta$  141.1, 140.4, 136.3, 134.3, 133.9, 131.7, 130.2, 129.5, 128.4, 127.7, 127.1, 126.3, 126.2, 126.1, 125.9, 125.5, 7.7, 3.6.

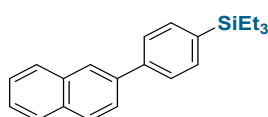

**Triethyl(4-(naphthalen-2-yl)phenyl)silane (23).** This compound is known<sup>6</sup>. The

product **23** (38.2 mg, 60% yield) as a white solid was purified with silica gel chromatography.  $^1\text{H}$  NMR (400 MHz,  $\text{CDCl}_3$ )  $\delta$  8.08 (s, 1 H), 7.95-7.87 (m, 3 H), 7.80-7.76 (m, 1 H), 7.76-7.70 (m, 2 H), 7.66-7.60 (m, 2 H), 7.55-7.45 (m, 2 H), 1.03 (t,  $J = 8.0$  Hz, 9 H), 0.86 (q,  $J = 8.0$  Hz, 6 H).  $^{13}\text{C}$  NMR (100 MHz,  $\text{CDCl}_3$ )  $\delta$  141.4, 138.6, 136.5, 134.9, 133.8, 132.8, 128.5, 128.4, 127.8, 126.8, 126.4, 126.1, 125.9, 125.7, 7.6, 3.6.

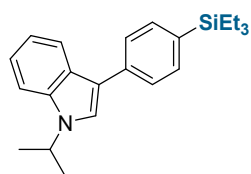

**1-isopropyl-3-(4-(triethylsilyl)phenyl)-1H-indole (24)**. This compound is unknown. The product **24** (50 mg, 72% yield) as a white solid was purified with silica gel chromatography.  $^1\text{H}$  NMR (400 MHz,  $\text{CDCl}_3$ )  $\delta$  8.00 (d,  $J = 8.0$  Hz, 1 H), 7.68 (d,  $J = 7.6$  Hz, 2 H), 7.58 (d,  $J = 7.6$  Hz, 2 H), 7.44 (d,  $J = 6.0$  Hz, 2 H), 7.28 (t,  $J = 7.8$  Hz, 1 H), 7.20 (t,  $J = 7.4$  Hz, 1 H), 4.73 (p,  $J = 6.8$  Hz, 1 H), 1.59 (d,  $J = 6.8$  Hz, 6 H), 1.03 (t,  $J = 7.8$  Hz, 9 H), 0.82-0.88 (m, 6 H).  $^{13}\text{C}$  NMR (100 MHz,  $\text{CDCl}_3$ )  $\delta$  136.5, 136.5, 134.8, 134.2, 126.7, 126.3, 121.8, 121.8, 120.3, 120.0, 117.0, 109.9, 47.2, 25.2, 23.0, 7.6, 3.6. FTMS (EI): Calculated for  $\text{C}_{23}\text{H}_{31}\text{NSi}$  ( $\text{M}$ ) $^+$ : 349.22203; Found: 349.22165.

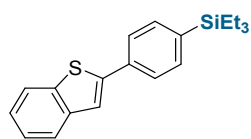

**(4-(benzo[b]thiophen-2-yl)phenyl)triethylsilane (25)**. This compound is unknown. The product **25** (53 mg, 81% yield) as a white solid was purified with silica gel chromatography.  $^1\text{H}$  NMR (400 MHz,  $\text{CDCl}_3$ )  $\delta$  7.85 (d,  $J = 8.0$  Hz, 1 H), 7.79 (d,  $J = 7.6$  Hz, 1 H), 7.72 (d,  $J = 7.6$  Hz, 2 H), 7.59 (d,  $J = 4.8$  Hz, 2 H), 7.56 (s, 1 H), 7.35 (m, 2 H), 1.01 (t,  $J = 7.8$  Hz, 9 H), 0.84 (q,  $J = 7.9$  Hz, 6 H).  $^{13}\text{C}$  NMR (100 MHz,  $\text{CDCl}_3$ )  $\delta$  144.5, 140.8, 139.6, 138.0, 134.9, 134.6, 125.7, 124.6, 124.4, 123.7, 122.4, 119.5, 7.6, 3.4. FTMS (EI): Calculated for  $\text{C}_{20}\text{H}_{24}\text{SSi}$  ( $\text{M}$ ) $^+$ : 324.13625; Found: 324.13630.

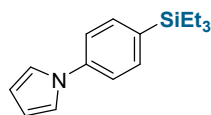

**1-(4-(triethylsilyl)phenyl)-1H-pyrrole (26).** This compound is known<sup>5</sup>. The product **26** (36 mg, 71% yield) as a colourless oil was purified with silica gel chromatography. <sup>1</sup>H NMR (400 MHz, CDCl<sub>3</sub>) δ 7.54 (d, *J* = 8.4 Hz, 2 H), 7.38 (d, *J* = 8.4 Hz, 2 H), 7.12 (s, 2 H), 6.35 (s, 2 H), 1.00 (t, *J* = 7.8 Hz, 9 H), 0.83 (q, *J* = 7.6 Hz, 6 H). <sup>13</sup>C NMR (100 MHz, CDCl<sub>3</sub>) δ 141.2, 135.6, 134.6, 119.8, 119.3, 110.5, 7.5, 3.5.

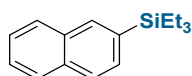

**triethyl(naphthalen-2-yl)silane (27).** This compound is known<sup>10</sup>. The product **27** (32 mg, 66% yield) as a colourless oil was purified with silica gel chromatography. <sup>1</sup>H NMR (400 MHz, CDCl<sub>3</sub>) δ 8.00 (s, 1 H), 7.90-7.76 (m, 3 H), 7.67-7.57 (m, 1 H), 7.50 (m, 2 H), 1.03 (t, *J* = 7.6 Hz, 9 H), 0.90 (q, *J* = 7.7 Hz, 6 H). <sup>13</sup>C NMR (100 MHz, CDCl<sub>3</sub>): δ 135.1, 134.9, 133.8, 133.1, 130.7, 128.1, 127.8, 126.9, 126.3, 125.9, 7.6, 3.5.

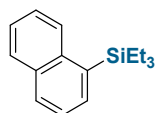

**Triethyl(naphthalen-1-yl)silane (28).** This compound is known<sup>10</sup>. The product **28** (34 mg, 70% yield) as a colourless oil was purified with silica gel chromatography. <sup>1</sup>H NMR (400 MHz, CDCl<sub>3</sub>) δ 8.16-8.13 (m, 1 H), 7.90-7.88 (m, 2 H), 7.69 (d, *J* = 6.8 Hz, 1 H), 7.55-7.47 (m, 3 H), 1.10-0.97 (m, 15 H). <sup>13</sup>C NMR (100 MHz, CDCl<sub>3</sub>) δ 137.6, 135.3, 134.6, 133.5, 129.7, 129.2, 128.0, 125.7, 125.4, 125.2, 7.8, 4.6.

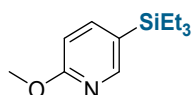

**2-methoxy-5-(triethylsilyl)pyridine (29).** This compound is known<sup>7</sup>. The product **29** (25.9 mg, 58% yield) as a yellow oil was purified with silica gel chromatography. <sup>1</sup>H NMR (400 MHz, CDCl<sub>3</sub>) δ 8.22 (s, 1 H), 7.63 (d, *J* = 8.4 Hz, 1 H), 6.74 (d, *J* = 8.4 Hz, 1 H), 3.94 (s, 3 H), 0.96 (t, *J* = 7.8 Hz, 9 H), 0.77 (q, *J* = 7.8 Hz, 6 H). <sup>13</sup>C NMR (100

MHz, CDCl<sub>3</sub>)  $\delta$  164.8, 152.4, 144.3, 123.3, 110.8, 53.3, 7.4, 3.4.

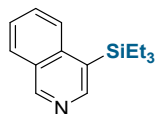

**4-(triethylsilyl)isoquinoline (30).** This compound is unknown. The product **30** (25 mg, 51% yield) as a yellow oil was purified with silica gel chromatography. <sup>1</sup>H NMR (400 MHz, CDCl<sub>3</sub>)  $\delta$  9.24 (s, 1 H), 8.57 (s, 1 H), 8.03 (d, *J* = 8.4 Hz, 1 H), 7.97 (d, *J* = 8.0 Hz, 1 H), 7.70 (t, *J* = 7.6 Hz, 1 H), 7.60 (m, *J* = 7.4 Hz, 1 H), 1.07-0.86 (m, 15 H). <sup>13</sup>C NMR (100 MHz, CDCl<sub>3</sub>)  $\delta$  154.1, 149.7, 140.0, 130.3, 129.0, 128.3, 126.8, 126.8, 7.7, 4.3. FTMS (EI): Calculated for C<sub>15</sub>H<sub>21</sub>NSi (M)<sup>+</sup>: 243.14378; Found: 243.14381.

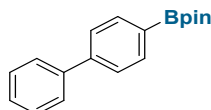

**2-([1,1'-Biphenyl]-4-yl)-4,4,5,5-tetramethyl-1,3,2-dioxaborolane (31).**

This compound is known<sup>8</sup>. The product **31** (59.6 mg, 0.3 mmol, 71% yield) as a white solid was purified with silica gel chromatography. <sup>1</sup>H NMR (400 MHz, CDCl<sub>3</sub>)  $\delta$  7.94 (d, *J* = 7.2 Hz, 2 H), 7.66 (d, *J* = 7.2 Hz, 4 H), 7.47 (t, *J* = 7.2 Hz, 2 H), 7.39 (t, *J* = 7.2 Hz, 1 H), 1.34 (s, 12 H). <sup>13</sup>C NMR (100 MHz, CDCl<sub>3</sub>)  $\delta$  144.0, 141.1, 135.4, 128.9, 127.7, 127.3, 126.6, 83.9, 25.0.

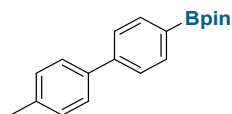

**4-Methyl-4'-(4,4,5,5-tetramethyl-1,3,2-dioxaborolan-2-yl)biphenyl (32).** This compound is known<sup>12</sup>. The product **32** (54.7 mg, 0.3 mmol, 62% yield) as a white solid was purified with silica gel chromatography. <sup>1</sup>H NMR (400 MHz, CDCl<sub>3</sub>)  $\delta$  7.91 (d, *J* = 7.8 Hz, 2 H), 7.62 (d, *J* = 7.8 Hz, 2 H), 7.54 (d, *J* = 7.8 Hz, 2 H), 7.27 (d, *J* = 7.8 Hz, 2 H), 2.41 (s, 3 H), 1.38 (s, 12 H); <sup>13</sup>C NMR (100 MHz, CDCl<sub>3</sub>)  $\delta$  144.0, 138.2, 137.5, 135.4, 129.6, 127.2, 126.4, 83.9, 25.0, 21.2.



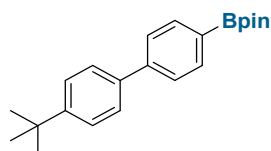

**2-(4'-(Tert-Butyl)-[1,1'-biphenyl]-4-yl)-4,4,5,5-tetramethyl-1,3,2-dioxaborolane (33).** This compound is known<sup>8</sup>. The product **33** (55.4 mg, 0.3 mmol, 55% yield) as a white solid was purified with silica gel chromatography. <sup>1</sup>H NMR (400 MHz, CDCl<sub>3</sub>) δ 7.87 (d, *J* = 7.6 Hz, 2 H), 7.61 (d, *J* = 8.0 Hz, 2 H), 7.56 (d, *J* = 8.4 Hz, 2 H), 7.46 (d, *J* = 8.0 Hz, 2 H), 1.37 (s, 21 H). <sup>13</sup>C NMR (100 MHz, CDCl<sub>3</sub>) δ 150.8, 143.9, 138.2, 135.4, 127.0, 126.4, 125.9, 83.9, 34.7, 31.5, 25.0.

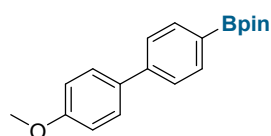

**2-(4'-Methoxy-[1,1'-biphenyl]-4-yl)-4,4,5,5-tetramethyl-1,3,2-dioxaborolane (34).** This compound is known<sup>9</sup>. The product **34** (56.7 mg, 0.3 mmol, 61% yield) as a white solid was purified with silica gel chromatography. <sup>1</sup>H NMR (400 MHz, CDCl<sub>3</sub>) δ 7.87 (d, *J* = 8.0 Hz, 2 H), 7.72-7.50 (m, 4 H), 6.98 (d, *J* = 8.8 Hz, 2 H), 3.85 (s, 3 H), 1.37 (s, 12 H). <sup>13</sup>C NMR (100 MHz, CDCl<sub>3</sub>) δ 159.5, 143.6, 135.4, 133.6, 128.4, 126.1, 114.4, 83.9, 55.5, 25.0.

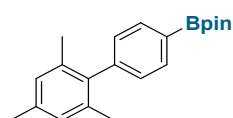

**4-(4,4,5,5-Tetramethyl-1,3,2-dioxaborolan-2-yl)-2',4',6'-trimethylbiphenyl (35).** This compound is known<sup>12</sup>. The product **35** (43.5 mg, 0.3 mmol, 45% yield) as a colorless oil was purified with silica gel chromatography. <sup>1</sup>H NMR (400 MHz, CDCl<sub>3</sub>) δ 7.88 (d, *J* = 7.6 Hz, 2 H), 7.17 (d, *J* = 7.6 Hz, 2 H), 6.95 (s, 2 H), 2.34 (s, 3 H), 2.00 (s, 6 H), 1.39 (s, 12 H); <sup>13</sup>C NMR (100 MHz, CDCl<sub>3</sub>) δ 144.4, 139.0, 136.7, 135.8, 135.0, 128.9, 128.2, 83.9, 25.0, 21.1, 20.8.

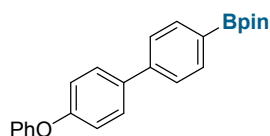

**4-Phenoxy-4'-(4,4,5,5-tetramethyl-1,3,2-dioxaborolan-2-yl)biphenyl (36).** This compound is known<sup>12</sup>. The product **36** (58 mg, 0.3 mmol, 52% yield) as a white solid was purified with silica gel chromatography. <sup>1</sup>H NMR (400 MHz, CDCl<sub>3</sub>) δ 7.87 (d, *J* = 7.6 Hz, 2 H), 7.59 (d, *J* = 8.4 Hz, 4 H), 7.37 (t, *J* = 7.8 Hz, 2 H), 7.14 (t, *J* = 7.4 Hz, 1 H), 7.08 (t, *J* = 7.6 Hz, 4 H), 1.37 (s, 12 H); <sup>13</sup>C NMR (100 MHz, CDCl<sub>3</sub>) δ 157.2, 157.2, 143.3, 136.1, 135.4, 135.4, 129.9, 128.7, 126.3, 123.6, 119.2, 84.0, 25.0.

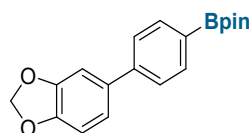

**3,4-Methylenedioxy-4'-(4,4,5,5-tetramethyl-1,3,2-dioxaborolan-2-yl)biphenyl (37).**

This compound is known<sup>12</sup>. The product **37** (59.3 mg, 0.3 mmol, 61% yield) as a white solid was purified with silica gel chromatography. <sup>1</sup>H NMR (CDCl<sub>3</sub>) δ 7.86 (d, *J* = 7.6 Hz, 2 H), 7.54 (d, *J* = 8.0 Hz, 2 H), 7.10-7.08 (m, 2 H), 6.88 (m, 1 H), 6.00 (s, 2 H), 1.37 (s, 12 H); <sup>13</sup>C NMR (100 MHz, CDCl<sub>3</sub>) δ 148.3, 147.4, 143.7, 135.4, 126.3, 120.9, 108.7, 107.8, 101.3, 83.9, 25.0.

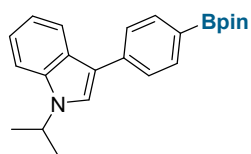

**1-Isopropyl-3-(4-(4,4,5,5-tetramethyl-1,3,2-dioxaborolan-2-yl)phenyl)indole (38).**

This compound is known<sup>12</sup>. The product **38** (49.8 mg, 0.3 mmol, 46% yield) as a pale yellow oil was purified with silica gel chromatography. <sup>1</sup>H NMR (CDCl<sub>3</sub>) δ 7.99 (d, *J* = 8.0 Hz, 1 H), 7.90 (d, *J* = 8.0 Hz, 2 H), 7.71 (d, *J* = 8.0 Hz, 2 H), 7.46 (s, 1 H), 7.44 (d, *J* = 8.4 Hz, 1 H), 7.28 (d, *J* = 7.5 Hz, 1 H), 7.20 (d, *J* = 7.5 Hz, 1 H), 4.73 (m, 1 H), 1.59 (d, *J* = 6.8 Hz, 6 H), 1.39 (s, 12 H); <sup>13</sup>C NMR (100 MHz, CDCl<sub>3</sub>) δ 139.0, 136.6, 135.4, 126.5, 126.2, 122.1, 121.9, 120.2, 116.8, 109.9, 83.8, 47.3, 25.0, 23.0.

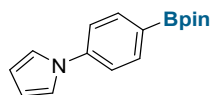

**N-(4-(4,4,5,5-Tetramethyl-1,3,2-dioxaborolan-2-yl)phenyl)pyrrole (39).**

This compound is known<sup>12</sup>. The product **39** (46.8 mg, 0.3 mmol, 58% yield) as a colorless oil was purified with silica gel chromatography. <sup>1</sup>H NMR (400 MHz, CDCl<sub>3</sub>) δ 7.86 (d, *J* = 8.0 Hz, 2H), 7.40 (d, *J* = 8.4 Hz, 2 H), 7.15-7.14 (m, 2 H), 6.36-6.35 (m, 2 H), 1.36 (s, 12 H); <sup>13</sup>C NMR (100 MHz, CDCl<sub>3</sub>) δ 142.9, 136.4, 119.4, 119.2, 110.9, 84.0, 25.0.

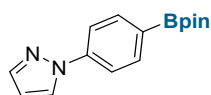

**1-(4-(4,4,5,5-Tetramethyl-1,3,2-dioxaborolan-2-yl)phenyl)-1H-pyrazole (40).** This compound is known<sup>12</sup>. The product **40** (44.6 mg, 0.3 mmol, 55% yield) as a colorless oil was purified with silica gel chromatography. <sup>1</sup>H NMR (400 MHz, CDCl<sub>3</sub>) δ 7.98 (m, 1 H), 7.88 (d, *J* = 8.1 Hz, 2 H), 7.75-7.70 (m, 2 H), 7.74 (s, 1 H), 6.48 (m, 1 H), 1.36 (s, 12 H); <sup>13</sup>C NMR (100 MHz, CDCl<sub>3</sub>) δ 142.3, 141.5, 136.3, 126.9, 118.1, 108.0, 84.1, 25.0.

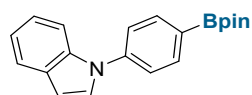

**1-(4-(4,4,5,5-Tetramethyl-1,3,2-dioxaborolan-2-yl)phenyl)-1H-Indole (41).** This compound is unknown. The product **41** (55.5 mg, 0.3 mmol, 58% yield) as a colorless oil was purified with silica gel chromatography. <sup>1</sup>H NMR (400 MHz, CDCl<sub>3</sub>) δ 7.98 (d, *J* = 8.0 Hz, 2 H), 7.70 (d, *J* = 7.6 Hz, 1 H), 7.63 (d, *J* = 8.4 Hz, 1 H), 7.54 (d, *J* = 8.4 Hz, 2 H), 7.38 (d, *J* = 3.2 Hz, 1 H), 7.17-7.27 (m, 2 H), 6.71 (d, *J* = 2.8 Hz, 1 H), 1.39 (s, 12 H); <sup>13</sup>C NMR (100 MHz, CDCl<sub>3</sub>) δ 142.4, 136.4, 135.7, 129.7, 128.3, 127.8, 124.7, 123.3, 122.6, 121.3, 120.7, 110.8, 104.2, 84.1, 77.5, 77.2, 76.8, 25.0. FTMS (EI): Calculated for C<sub>20</sub>H<sub>10</sub>BO<sub>2</sub> (M)<sup>+</sup>: 319.17381; Found: 319.17336.

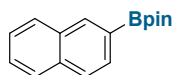

**2-(4,4,5,5-Tetramethyl-1,3,2-dioxaborolan-2-yl)naphthalene (42).** This compound is known<sup>8</sup>. The product **42** (48.8 mg, 0.3 mmol, 64% yield) as a brown solid was purified with silica gel chromatography. <sup>1</sup>H NMR (400 MHz, CDCl<sub>3</sub>) δ 8.37 (s, 1 H), 7.80-7.91 (m, 4 H), 7.44-7.54 (m, 2 H), 1.39 (s, 12 H); <sup>13</sup>C NMR (100 MHz, CDCl<sub>3</sub>) δ 136.4, 135.2, 133.0, 130.5, 128.8, 127.8, 127.1, 125.9, 84.0, 25.1.

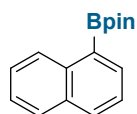

**1-(4,4,5,5-Tetramethyl-1,3,2-dioxaborolan-2-yl)naphthalene (43).** This compound is known<sup>8</sup>. The product **43** (57.9 mg, 0.3 mmol, 76% yield) as a colorless solid was purified with silica gel chromatography. <sup>1</sup>H NMR (400 MHz, CDCl<sub>3</sub>) δ 8.76 (m, 1 H), 8.08 (m, 1 H), 7.93 (m, 1 H), 7.83 (m, 1 H), 7.50-7.56 (m, 1 H), 7.43-7.50 (m, 2 H), 1.43 (s, 12 H); <sup>13</sup>C NMR (100 MHz, CDCl<sub>3</sub>) δ 137.1, 135.8, 133.3, 131.7, 128.6, 128.5, 126.5, 125.6, 125.1, 83.8, 25.1.

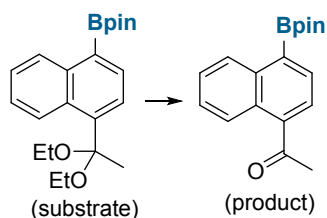

**1-(4-(4,4,5,5-tetramethyl-1,3,2-dioxaborolan-2-yl)naphthalen-1-yl)ethan-1-one (44).** This compound is known<sup>13</sup>. The product **44** (26.6 mg, 0.3 mmol, 30% yield) as a colorless solid was purified with silica gel chromatography. <sup>1</sup>H NMR (400 MHz, CDCl<sub>3</sub>) δ 8.79 (m, 1 H), 8.56 (m, 1 H), 8.07 (d, *J* = 7.2 Hz, 1 H), 7.81 (d, *J* = 7.2 Hz, 1 H), 7.57 (m, 2 H), 2.74 (s, 3 H) 1.44 (s, 12 H).

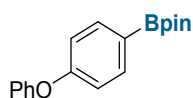

**4,4,5,5-Tetramethyl-2-(4-phenoxyphenyl)-1,3,2-dioxaborolane (45).** This

compound is known<sup>8</sup>. The product **45** (45.3 mg, 0.3 mmol, 51% yield) as a colourless oil was purified with silica gel chromatography. <sup>1</sup>H NMR (400 MHz, CDCl<sub>3</sub>) δ 7.79 (d, *J* = 8.4 Hz, 2 H), 7.35 (t, *J* = 8.4 Hz, 2 H), 7.13 (t, *J* = 7.4 Hz, 1 H), 7.03 (d, *J* = 8.4 Hz, 2 H), 6.99 (d, *J* = 8.4 Hz, 2 H), 1.35 (s, 12 H). <sup>13</sup>C NMR (100 MHz, CDCl<sub>3</sub>) δ 160.3, 156.7, 136.8, 129.9, 123.8, 119.6, 117.8, 83.9, 25.0.

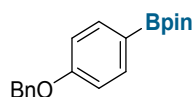

**2-(4-(benzyloxy)phenyl)-4,4,5,5-tetramethyl-1,3,2-dioxaborolane (46).** This compound is known<sup>14</sup>. The product **46** (60.5 mg, 0.3 mmol, 65% yield) as a colourless oil was purified with silica gel chromatography. <sup>1</sup>H NMR (400 MHz, CDCl<sub>3</sub>) δ 7.75 (d, *J* = 8.5 Hz, 2 H), 7.45-7.29 (m, 5 H), 6.98 (d, *J* = 8.5 Hz, 2 H), 5.09 (s, 2 H), 1.33 (s, 12 H). <sup>13</sup>C NMR (100 MHz, CDCl<sub>3</sub>) δ 161.5, 137.0, 136.7, 128.7, 128.1, 127.6, 114.4, 83.7, 69.9, 25.0.

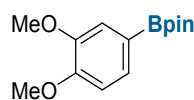

**2-(3,4-Dimethoxyphenyl)-4,4,5,5-tetramethyl-1,3,2-dioxaborolane (47).** This compound is known<sup>9</sup>. The product **47** (40.8 mg, 0.3 mmol, 51% yield) was purified with silica gel chromatography. <sup>1</sup>H NMR (400 MHz, CDCl<sub>3</sub>) δ 7.42 (d, *J* = 7.6 Hz, 1 H), 7.29 (s, 1 H), 6.88 (d, *J* = 7.6 Hz, 1 H), 3.92 (s, 3 H), 3.90 (s, 3 H), 1.34 (s, 12 H). <sup>13</sup>C NMR (100 MHz, CDCl<sub>3</sub>) δ 151.8, 148.5, 128.7, 116.7, 110.6, 83.8, 56.0, 55.9, 25.0.

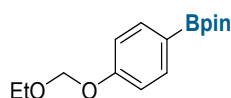

**2-(4-(ethoxymethoxy)phenyl)-4,4,5,5-tetramethyl-1,3,2-dioxaborolane (48).** The product **48** (50.9 mg, 0.3 mmol, 61% yield) as a colourless oil was purified with silica gel chromatography. <sup>1</sup>H NMR (400 MHz, CDCl<sub>3</sub>) δ 7.75 (d, *J* = 8.5 Hz, 2 H), 7.03 (d, *J* = 8.5 Hz, 2 H), 5.25 (s, 2 H), 3.72 (q, *J* = 7.1 Hz, 2 H), 1.33 (s, 12 H), 1.21 (t, *J* = 7.1

Hz, 3 H).  $^{13}\text{C}$  NMR (100 MHz,  $\text{CDCl}_3$ )  $\delta$  160.1, 136.6, 115.5, 92.9, 83.7, 64.4, 25.0, 15.2.

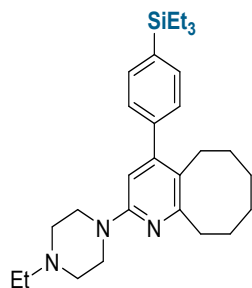

**2-(4-ethylpiperazin-1-yl)-4-(4-(triethylsilyl)phenyl)-5,6,7,8,9,10-**

**hexahydrocycloocta[b]pyridine (49).** This compound is known<sup>5</sup>. The product **49** (57.4 mg, 0.2 mmol, 62% yield) was purified with silica gel chromatography.  $^1\text{H}$  NMR (400 MHz,  $\text{CDCl}_3$ )  $\delta$  7.50 (d,  $J = 7.6$  Hz, 2 H), 7.23 (d,  $J = 7.6$  Hz, 2 H), 6.34 (s, 1 H), 3.55-3.51 (m, 4 H), 2.91-2.87 (m, 2 H), 2.62-2.58 (m, 2 H), 2.57-2.54 (m, 4 H), 2.46 (q,  $J = 7.2$  Hz, 2 H), 1.82-1.76 (m, 2 H), 1.46-1.39 (m, 4 H), 1.38-1.34 (m, 2 H), 1.13 (t,  $J = 7.2$  Hz, 3 H), 0.99 (t,  $J = 8.0$  Hz, 9 H), 0.81 (q,  $J = 8.0$  Hz, 6 H).  $^{13}\text{C}$  NMR (100 MHz,  $\text{CDCl}_3$ )  $\delta$  159.9, 157.4, 151.6, 141.9, 136.3, 133.9, 127.9, 123.1, 106.1, 52.9, 52.6, 45.7, 35.6, 31.8, 30.8, 26.7, 26.6, 26.0, 12.1, 7.6, 3.5.

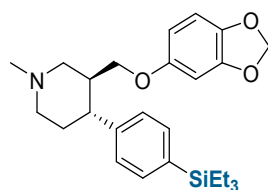

**3-((benzo[1,3]dioxol-5-yloxy)methyl)-1-methyl-4-(4-**

**(triethylsilyl)phenyl)piperidine (50).** The product **50** (39.5 mg, 0.2 mmol, 45% yield) was purified with silica gel chromatography.  $^1\text{H}$  NMR (400 MHz,  $\text{CDCl}_3$ )  $\delta$  7.40 (d,  $J = 7.6$  Hz, 2 H), 7.18 (d,  $J = 7.6$  Hz, 2 H), 6.61 (d,  $J = 8.4$  Hz, 1 H), 6.34 (s, 1 H), 6.12 (d,  $J = 8.4$  Hz, 1 H), 5.87 (s, 2 H), 3.61-3.57 (m, 1 H), 3.48-3.44 (m, 1 H), 3.27-2.24 (m, 2 H), 3.03-3.00 (m, 2 H), 2.39 (s, 3 H), 0.95 (t,  $J = 7.6$  Hz, 9 H), 0.77 (q,  $J = 7.6$  Hz, 6 H).  $^{13}\text{C}$  NMR (100 MHz,  $\text{CDCl}_3$ )  $\delta$  154.5, 148.2, 144.3, 141.6, 135.6, 134.7, 127.0, 107.9, 105.7, 101.2, 98.1, 69.8, 59.7, 56.3, 46.5, 44.3, 41.7, 34.0, 7.6, 3.5. FTMS (EI): Calculated for  $\text{C}_{26}\text{H}_{37}\text{NO}_3\text{Si}$  ( $\text{M}^+$ ): 439.25427; Found: 439.25268.

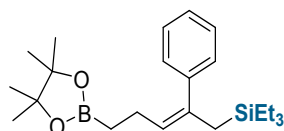

**Triethyl(2-phenyl-5-(4,4,5,5-tetramethyl-1,3,2-dioxaborolan-2-yl)pentyl)silane**

**(52)**. The product **52** (51.8 mg, 67% yield) as a colourless oil was purified with silica gel chromatography.  $^1\text{H}$  NMR (400 MHz,  $\text{CDCl}_3$ )  $\delta$  7.32 -7.27 (m, 2 H),  $\delta$  7.27 - 7.23 (m, 2 H),  $\delta$  7.20 - 7.16 (m, 1 H), 5.44 (t,  $J$  = 6.9 Hz, 1 H), 2.25 (q,  $J$  = 7.4 Hz, 2 H), 1.99 (s, 2 H), 1.25 (s, 12 H), 0.93 (t,  $J$  = 7.4 Hz, 2 H), 0.82 (t,  $J$  = 7.9 Hz, 9 H), 0.36 (q,  $J$  = 7.9 Hz, 6 H).  $^{13}\text{C}$  NMR (100 MHz,  $\text{CDCl}_3$ )  $\delta$  145.4, 137.3, 128.5, 128.0, 126.8, 126.4, 83.1, 25.0, 23.8, 16.2, 7.4, 3.9.

**Reference**

1. C. Zarate, R. Martin, *J. Am. Chem. Soc.* **2014**, *136*, 2236-2239.
2. C. Zarate, M. Nakajima, R. Martin, *J. Am. Chem. Soc.* **2017**, *139*, 1191-1197.
3. X. Wang, Z. Wang, Y. Nishihara, *Chem. Commun.* **2019**, *55*, 10507-10510.
4. L. Guo, A. Chatupheeraphat, M. Rueping, *Angew. Chem. Int. Ed.* **2016**, *55*, 11810-11813.
5. X. Liu, C. Zarate, R. Martin, *Angew. Chem. Int. Ed.* **2019**, *58*, 2064-2068.
6. X. Pu, J. Hu, Y. Zhao, Z. Shi, *ACS Catal.* **2016**, *6*, 6692-6698.
7. J. Jia, X. Zeng, Z. Liu, L. Zhao, C.-Y. He, X.-F. Li, Z. Feng, *Org. Lett.* **2020**, *22*, 2816-2821.
8. X. Zeng, Y. Zhang, Z. Liu, S. Geng, Y. He, Z. Feng, *Org. Lett.* **2020**, *22*, 2950-2955
9. S. Geng, J. Zhang, S. Chen, Z. Liu, X. Zeng, Y. He, Z. Feng, *Org. Lett.* **2020**, *22*, 5582-5588.

10. J. Zhang, Y. Zhang, S. Geng, S. Chen, Z. Liu, X. Zeng, Y. He, Z. Feng, *Org. Lett.* **2020**, *22*, 2669-2674.
11. M. Tobisu, Y. Kita, Y. Ano, N. Chatani, *J. Am. Chem. Soc.* **2008**, *130*, 15982-15989
12. T. Niwa, H. Ochiai, Y. Watanabe, and T. Hosoya, *J. Am. Chem. Soc.* **2015**, *137*, 14313-14318.
13. W. Zheng, Wei, X. Huang, S, Philip E, C. Gregory D. *Preparation of substituted pyrazolopyrimidines useful for inhibiting BMP*, United State Patent, WO 2016011019.
14. W. Liu, X. Yang, Y. Gao, C. Li, *J. Am. Chem. Soc.* **2017**, *139*, 8621-8627
15. G. C. Allen, M. T. Curtis, A. J. Hooper, P. M. Tucker, *J. Chem. Soc. Dalton Trans.* 1974, 1525-1530.
16. Y. Wang, Q. Yuan, Q. Zhang, and W. Deng, *J. Phys. Chem. C* 2007, *111*, 2044-2053.

### Triethyl(4-methoxyphenyl)silane (1)

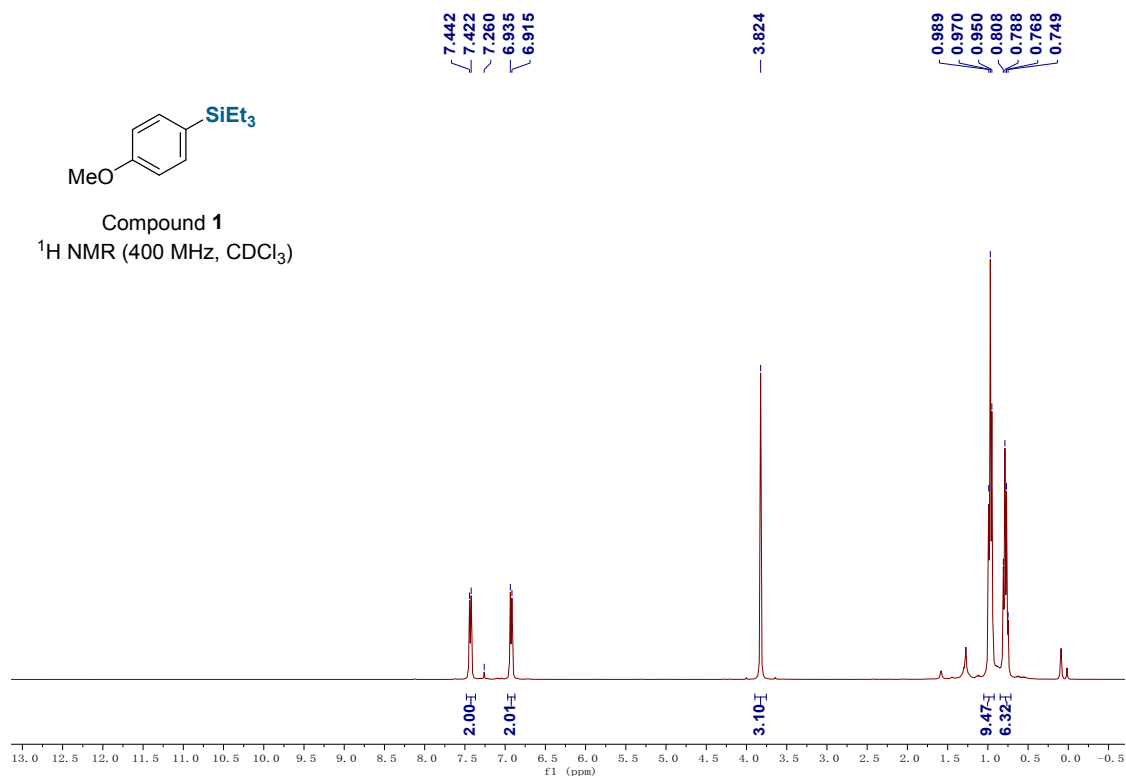



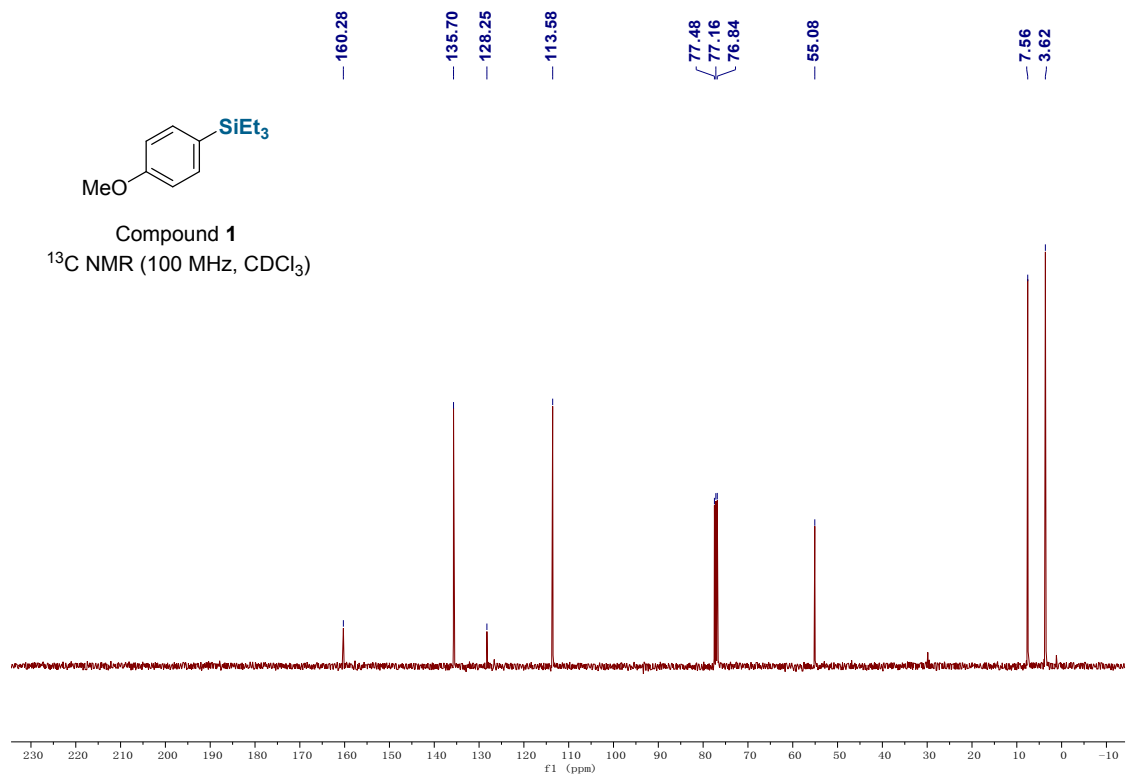

## Benzo[d][1,3]dioxol-4-yltriethylsilane (2)

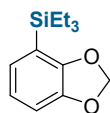

**Compound 2**

$^1\text{H}$  NMR (400 MHz,  $\text{CDCl}_3$ )

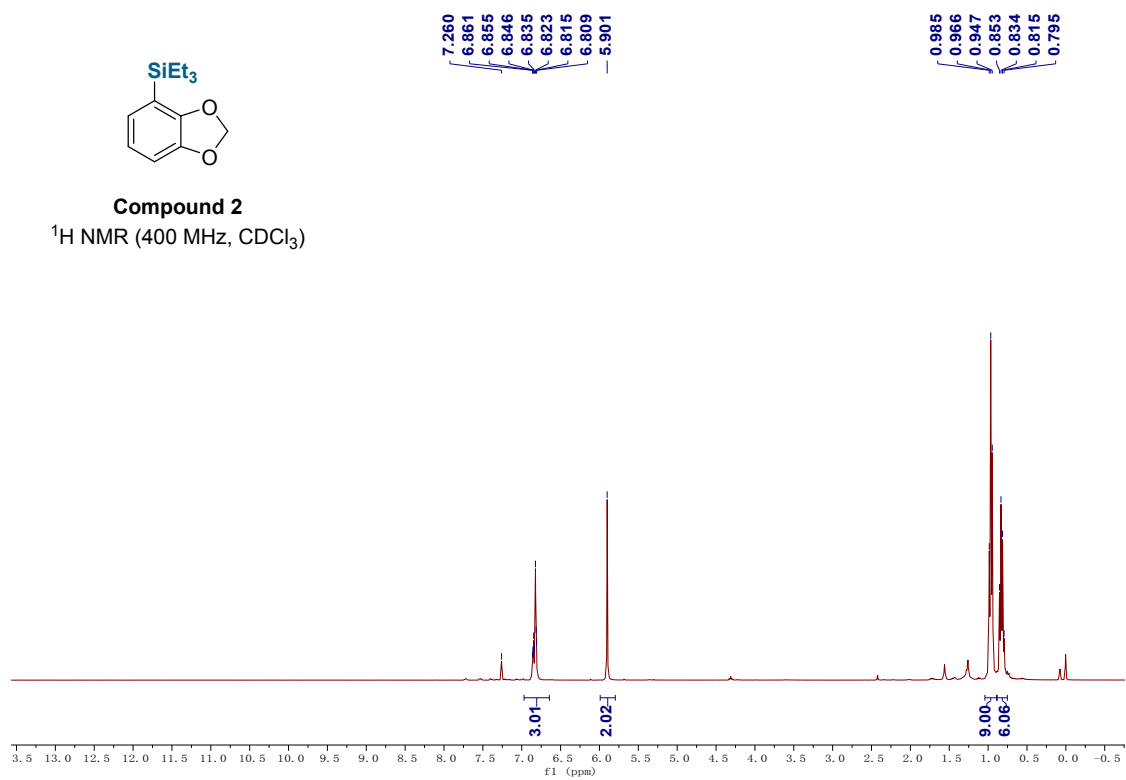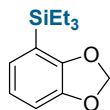

**Compound 2**

$^{13}\text{C}$  NMR (100 MHz,  $\text{CDCl}_3$ )

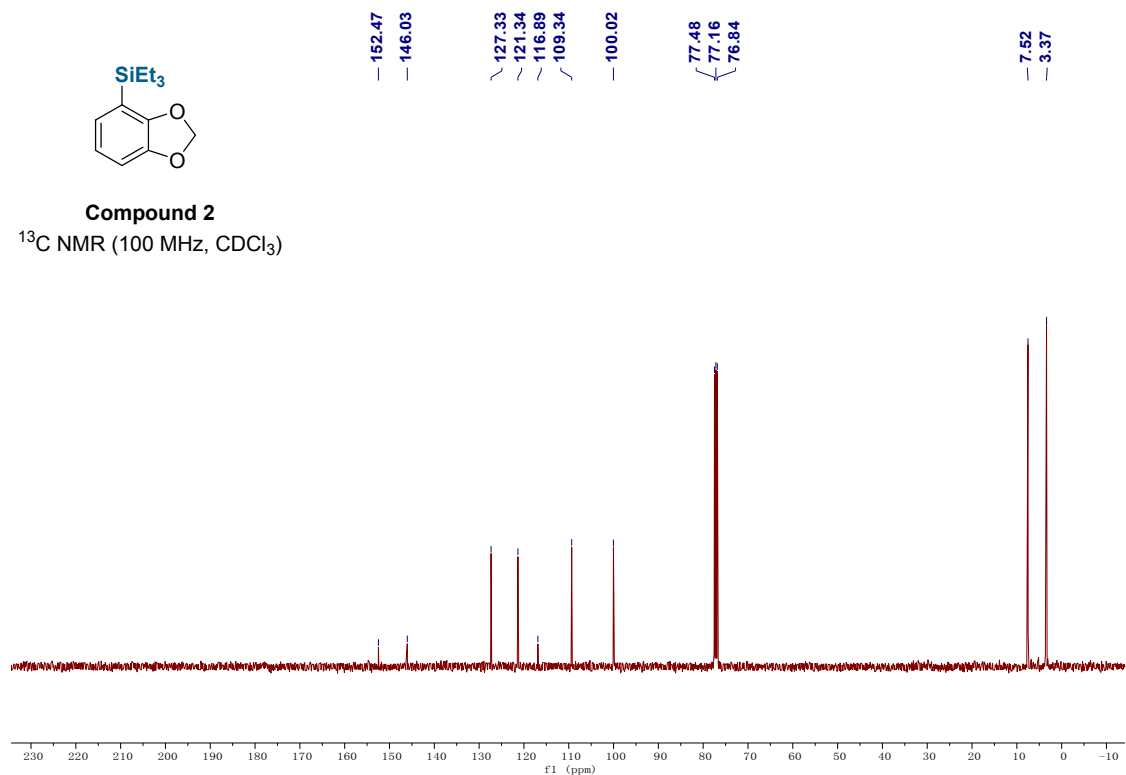

# Triethyl(3-((triisopropylsilyloxy)phenyl)silane (3)

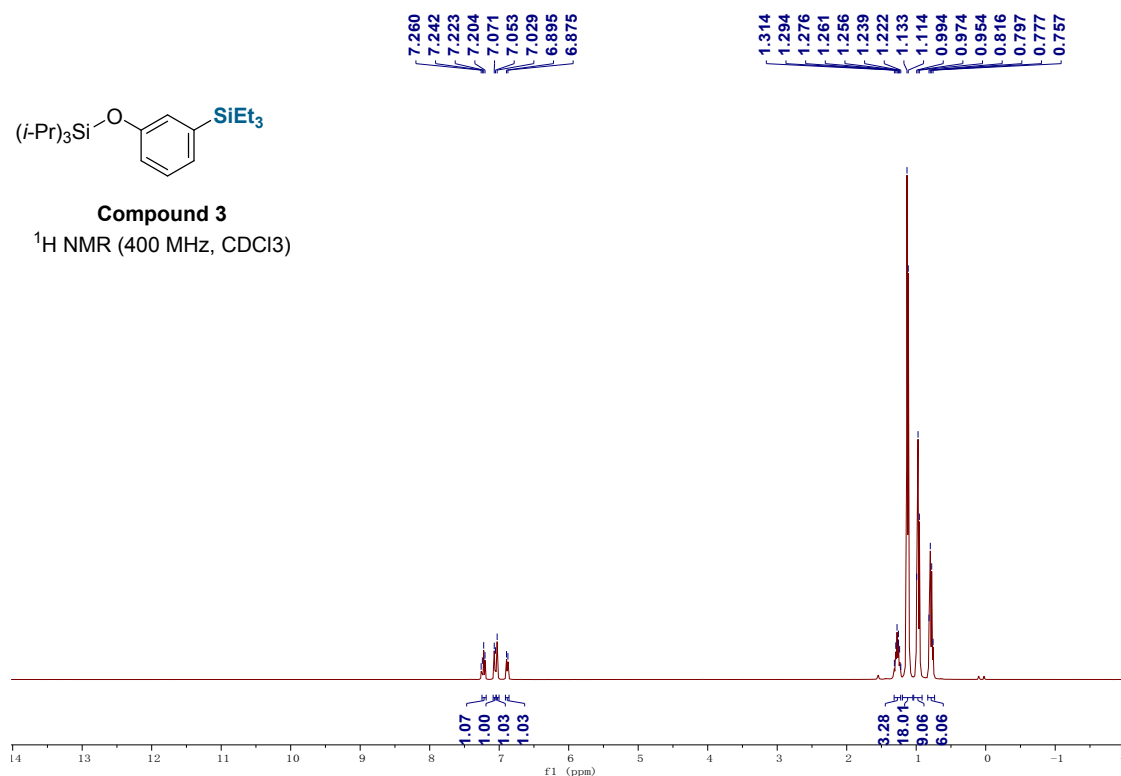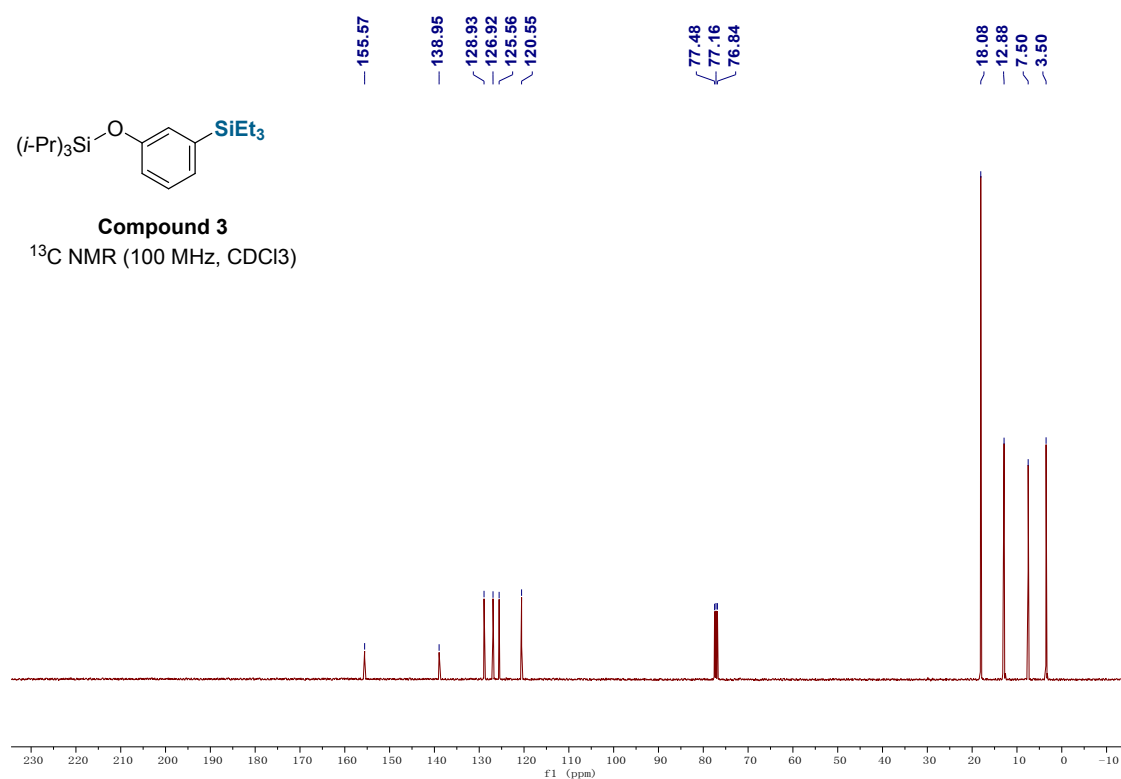

### (4-Cyclohexylphenyl)triethylsilane (4)

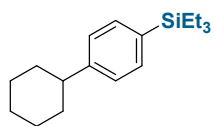

**Compound 4**

$^1\text{H}$  NMR (400 MHz,  $\text{CDCl}_3$ )

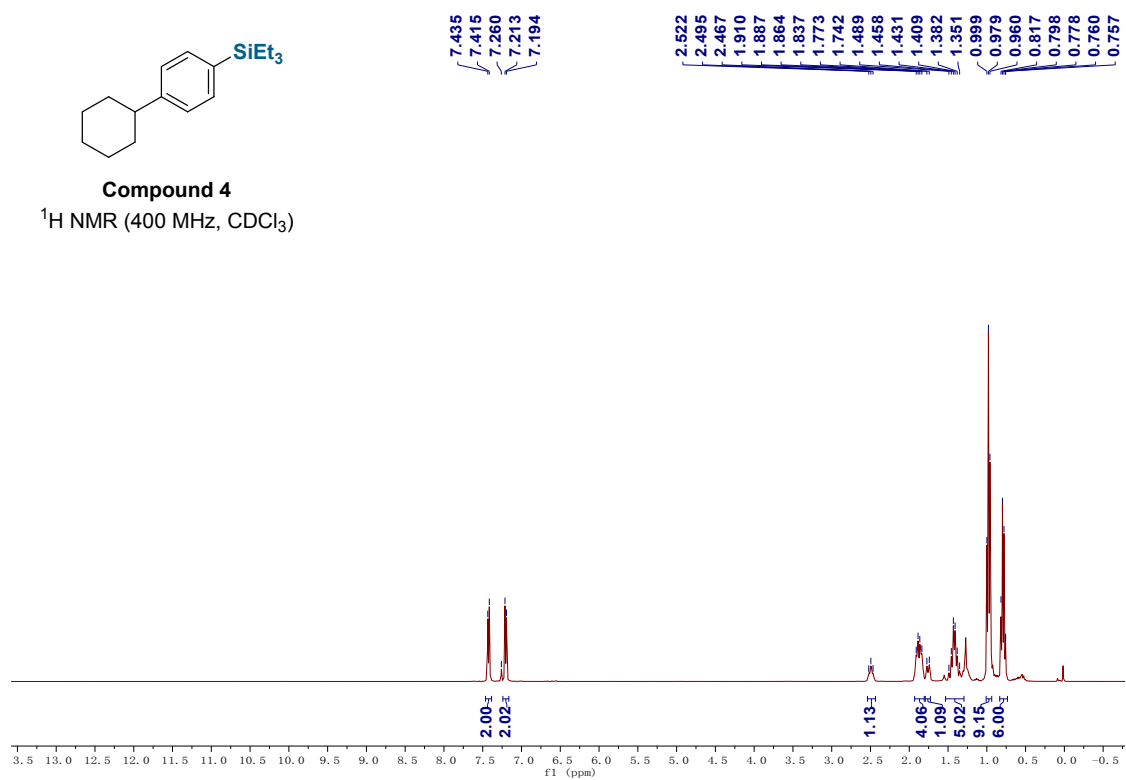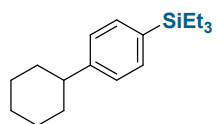

**Compound 4**

$^{13}\text{C}$  NMR (100 MHz,  $\text{CDCl}_3$ )

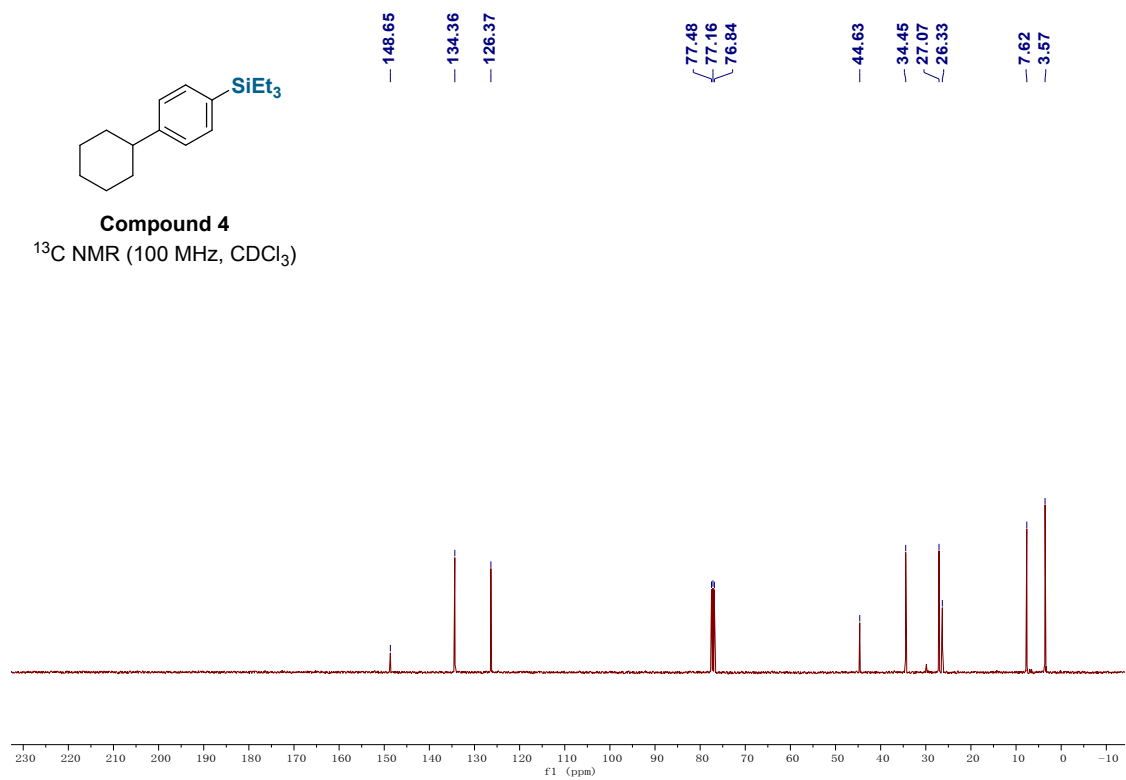

# Triethyl(*m*-tolyl)silane (5)

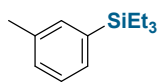

Compound 5

<sup>1</sup>H NMR (400 MHz, CDCl<sub>3</sub>)

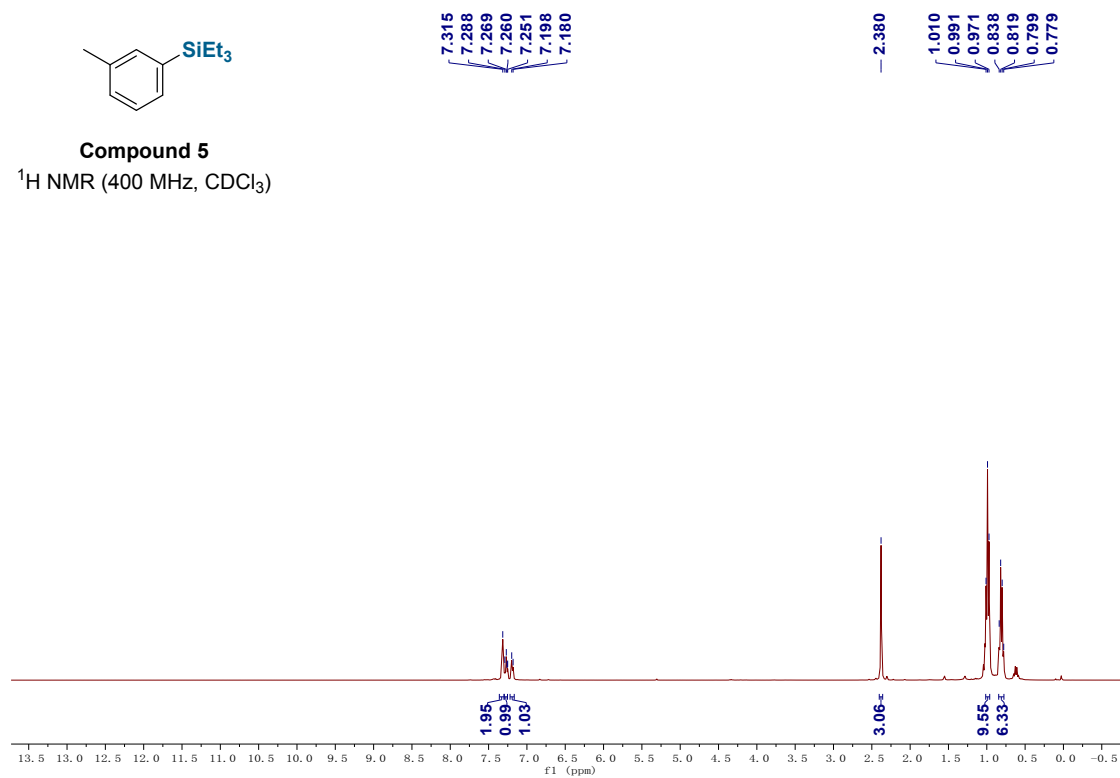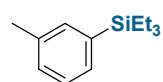

Compound 5

<sup>13</sup>C NMR (100 MHz, CDCl<sub>3</sub>)

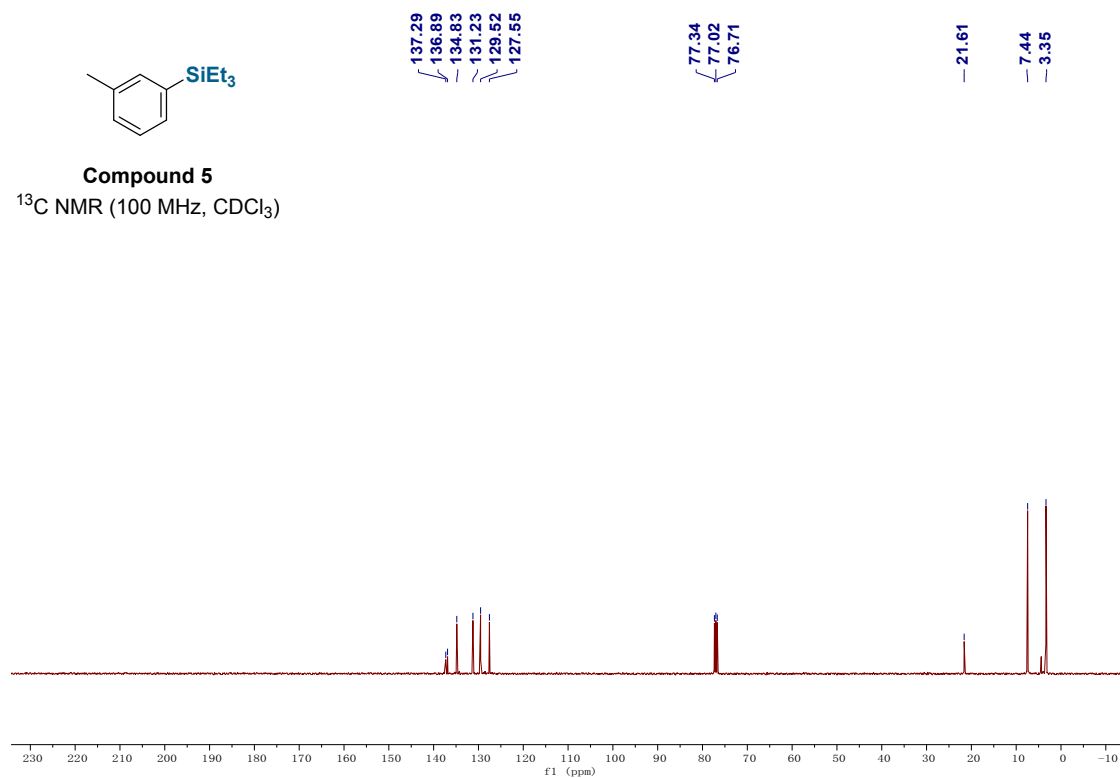

# Triethyl(*p*-tolyl)silane (6)

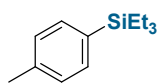

**Compound 6**

<sup>1</sup>H NMR (400 MHz, CDCl<sub>3</sub>)

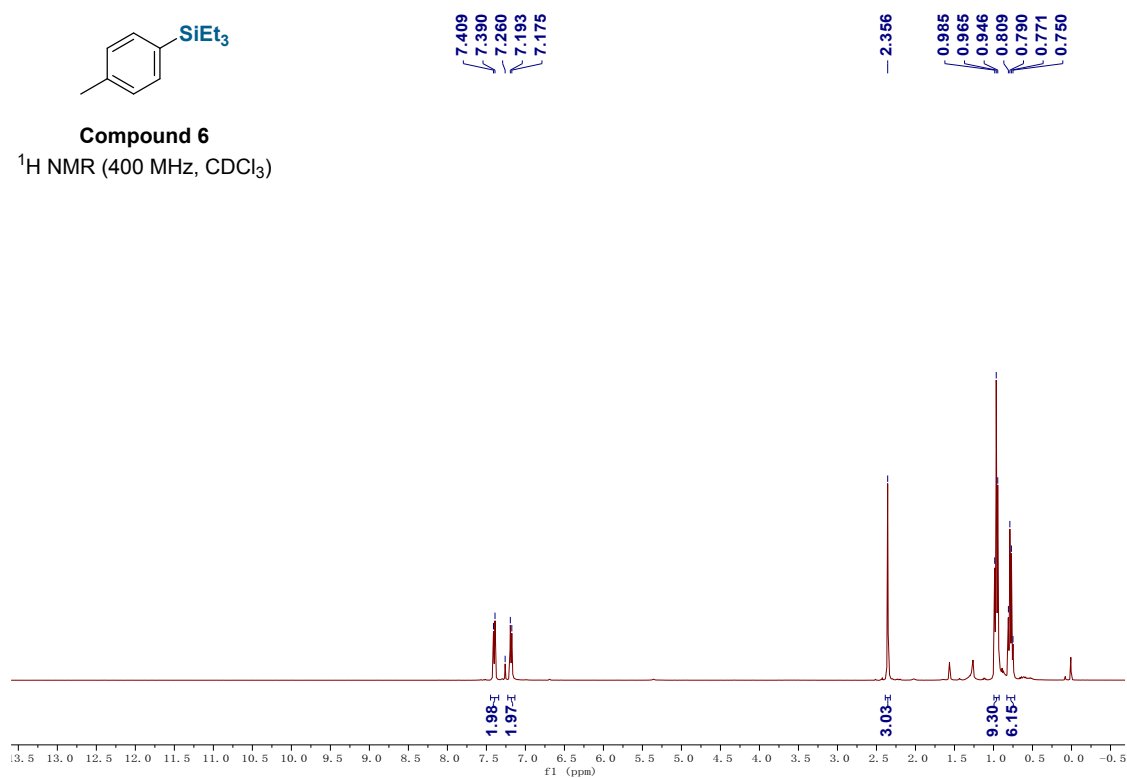

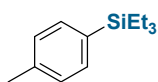

**Compound 6**

$^{13}\text{C}$  NMR (100 MHz,  $\text{CDCl}_3$ )

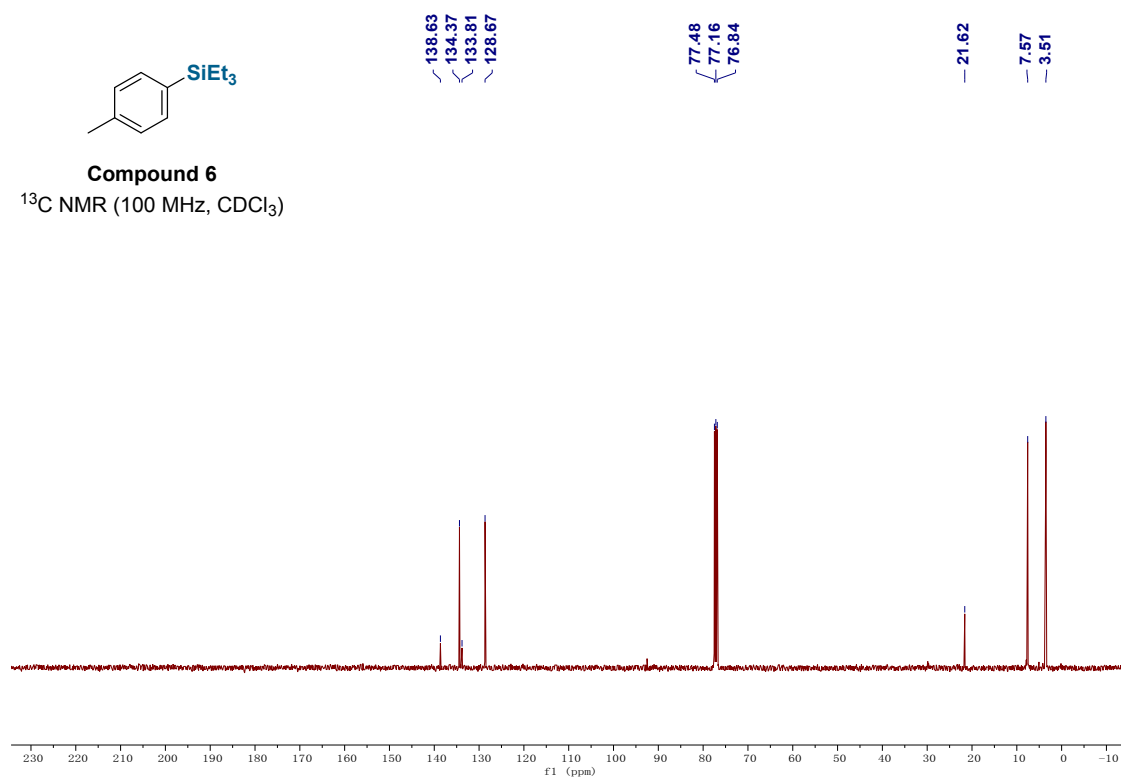

**(3,5-Dimethylphenyl)triethylsilane (7)**

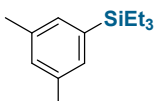

**Compound 7**

$^1\text{H}$  NMR (400 MHz,  $\text{CDCl}_3$ )

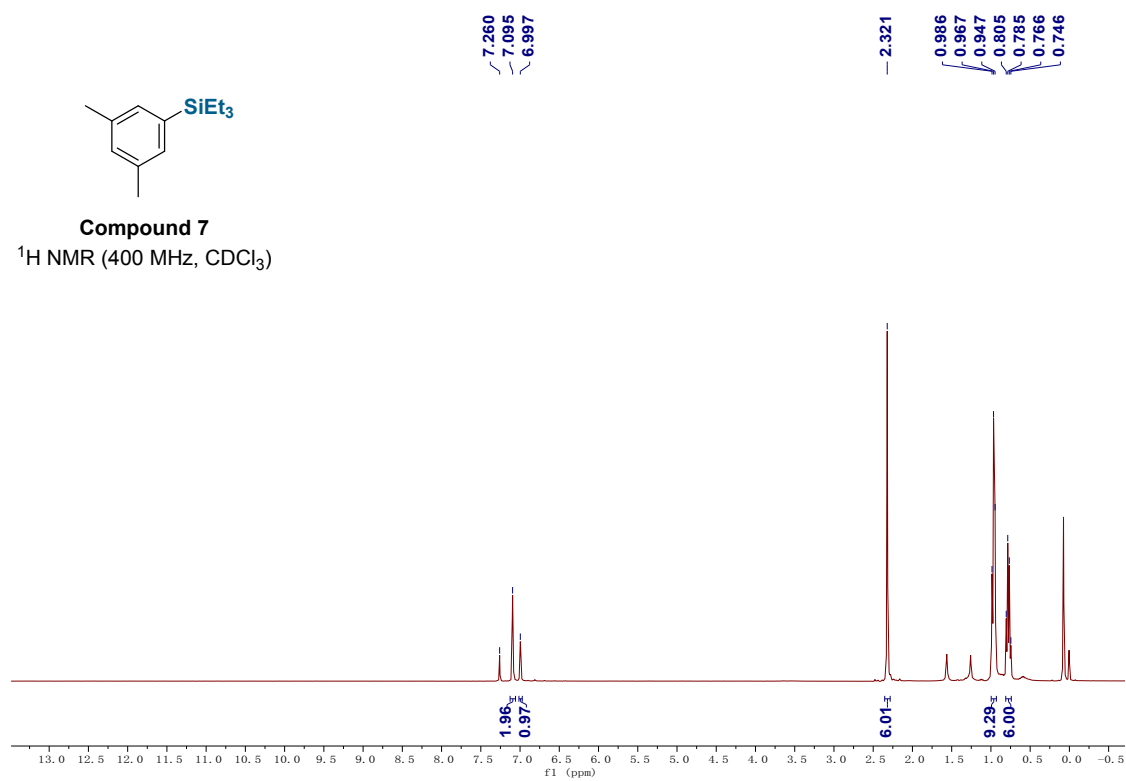

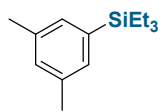

**Compound 7**  
<sup>13</sup>C NMR (100 MHz, CDCl<sub>3</sub>)

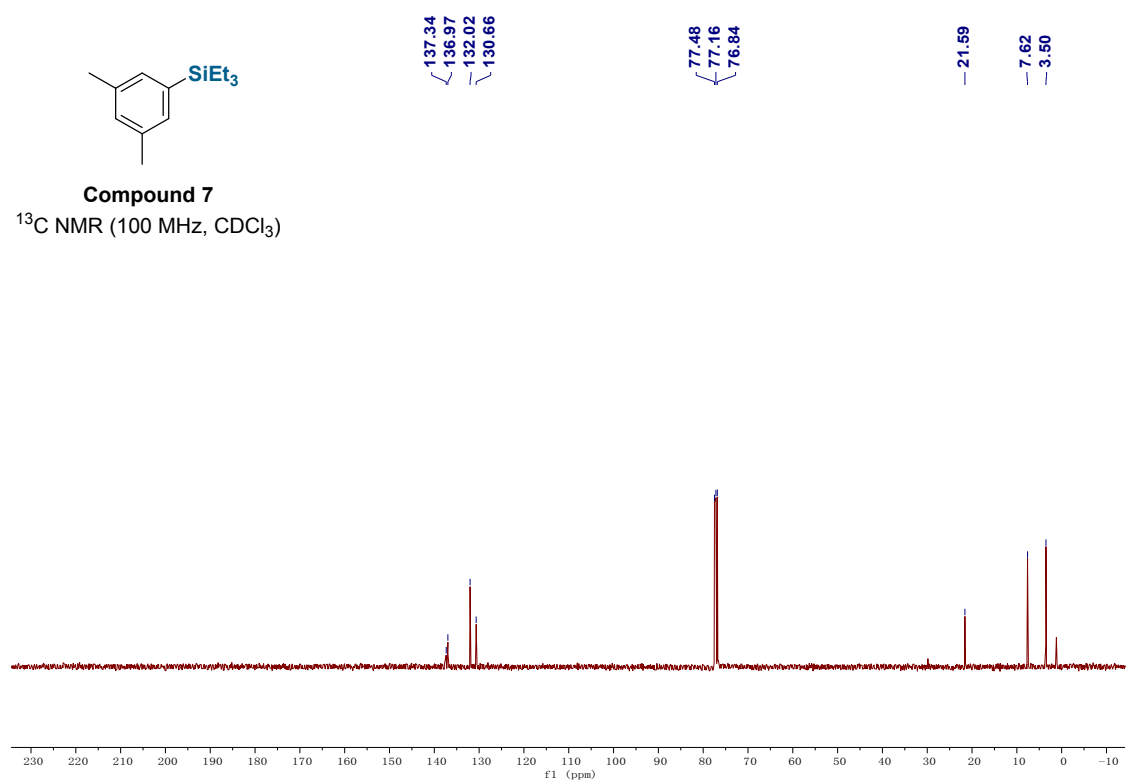

### 3,4-Dimethyl-1-(triethylsilyl)benzene (8)



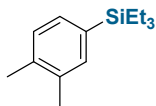

**Compound 8**  
<sup>1</sup>H NMR (400 MHz, CDCl<sub>3</sub>)

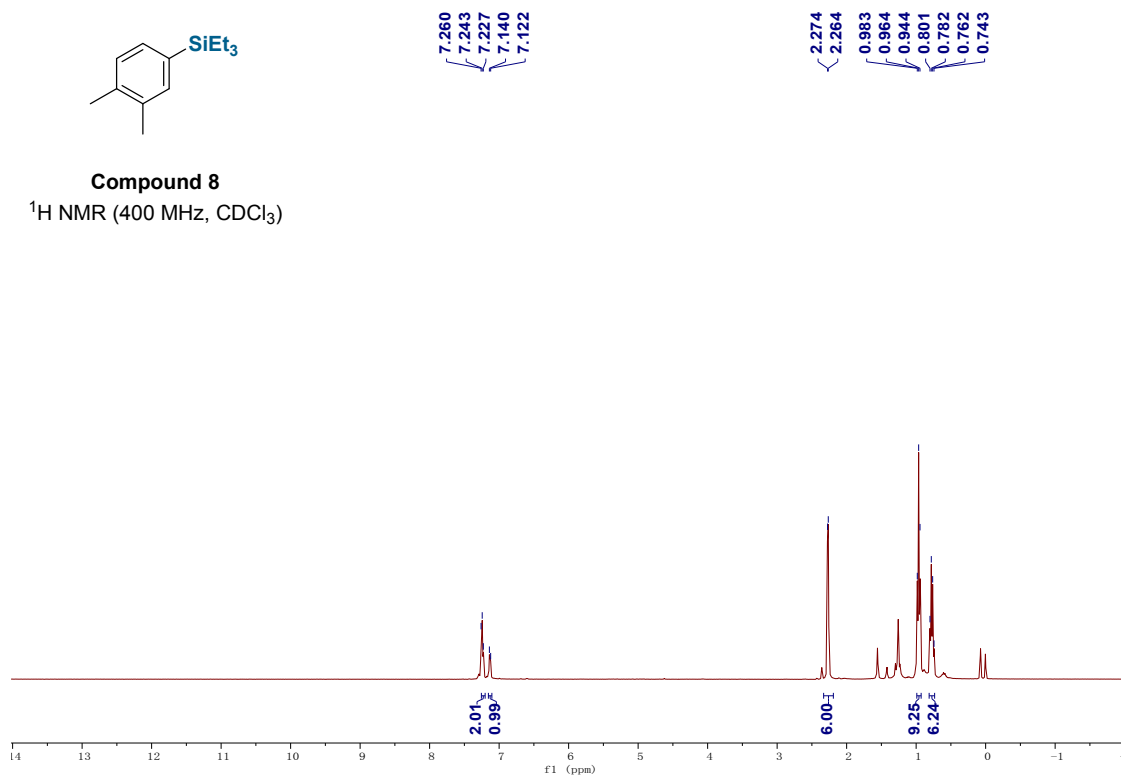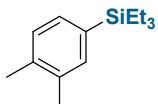

**Compound 8**  
<sup>13</sup>C NMR (100 MHz, CDCl<sub>3</sub>)

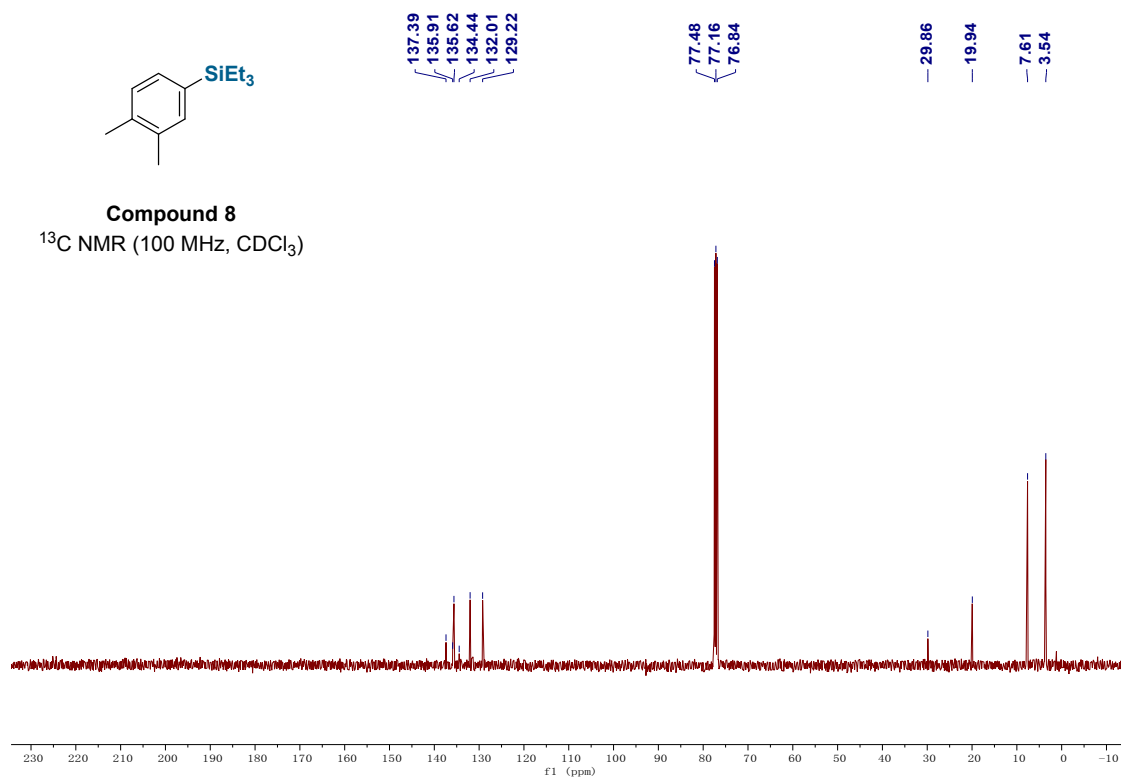

# *N,N*-dimethyl-4-(triethylsilyl)aniline (9)

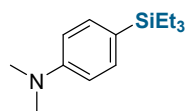

**Compound 9**

<sup>1</sup>H NMR (400 MHz, CDCl<sub>3</sub>)

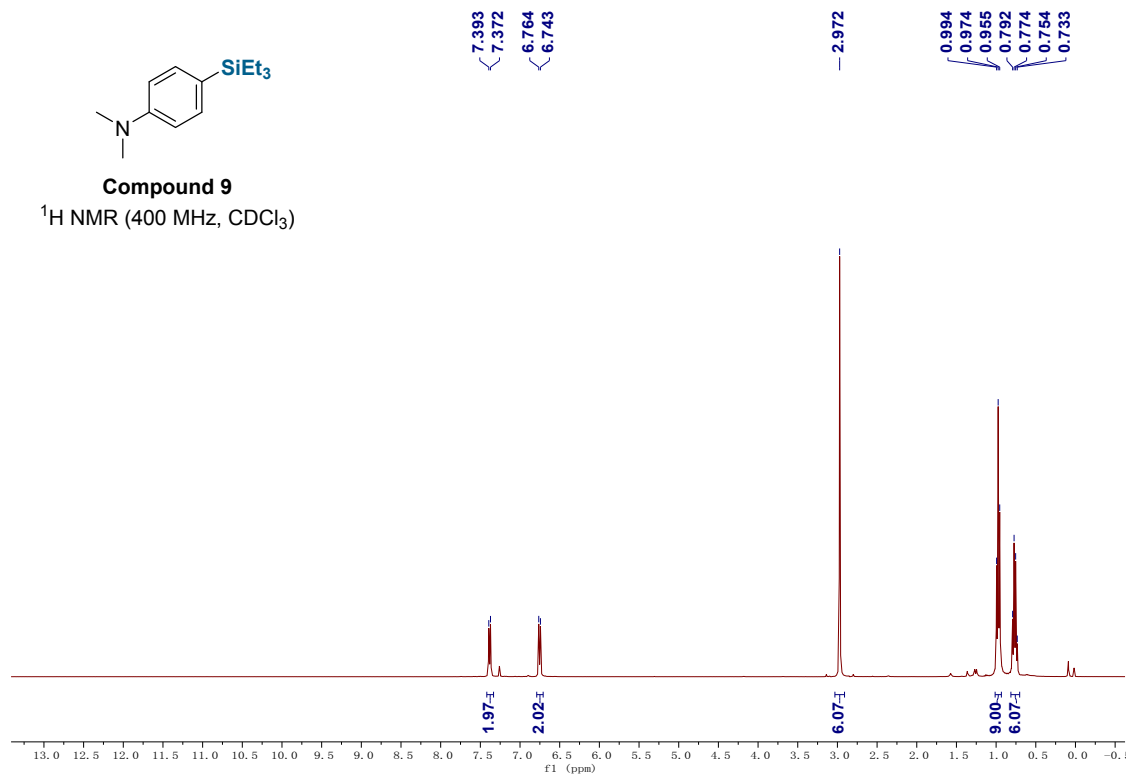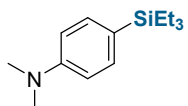

**Compound 9**

<sup>13</sup>C NMR (100 MHz, CDCl<sub>3</sub>)

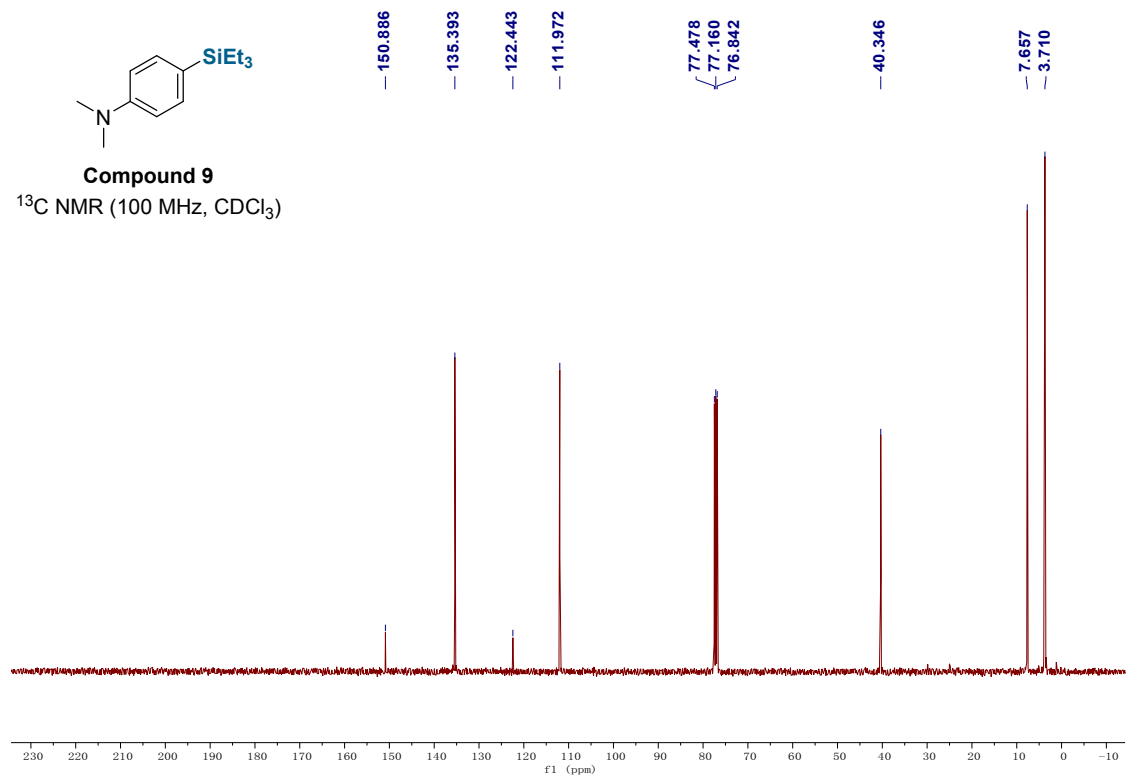

### 4-(4-(triethylsilyl)phenyl)morpholine (10).

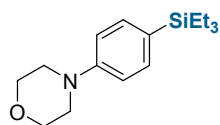

7.420  
7.402  
7.260  
6.923  
6.903

3.876  
3.864  
3.853  
3.212  
3.200  
3.189

0.990  
0.970  
0.951  
0.800  
0.780  
0.761  
0.741

**Compound 10**  
 $^1\text{H NMR}$  (400 MHz,  $\text{CDCl}_3$ )

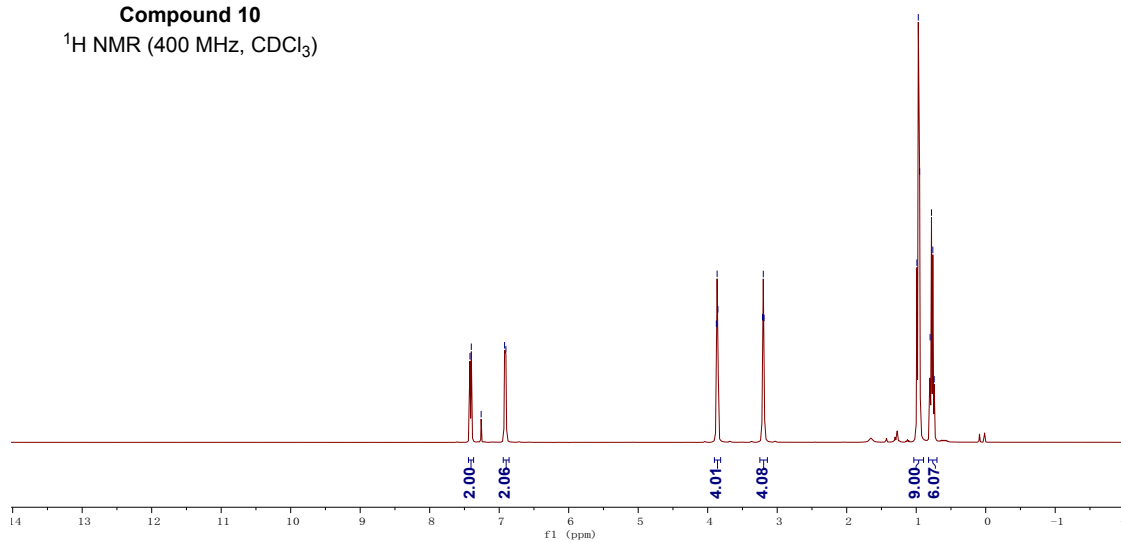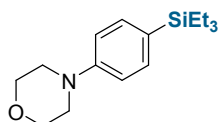

151.55  
135.45  
127.02  
114.79

77.48  
77.16  
76.84  
67.07

48.84

7.58  
3.65

**Compound 10**  
 $^{13}\text{C NMR}$  (100 MHz,  $\text{CDCl}_3$ )

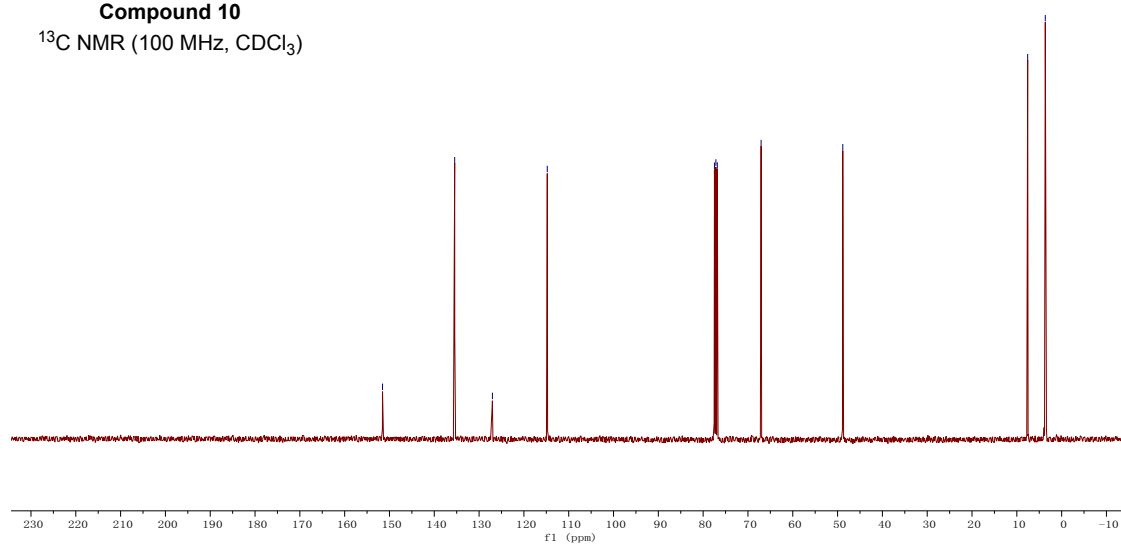

# N,N-dimethyl-1-(4-(triethylsilyl)phenyl)methanamine (11)

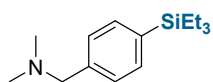

**Compound 11**

<sup>1</sup>H NMR (400 MHz, CDCl<sub>3</sub>)

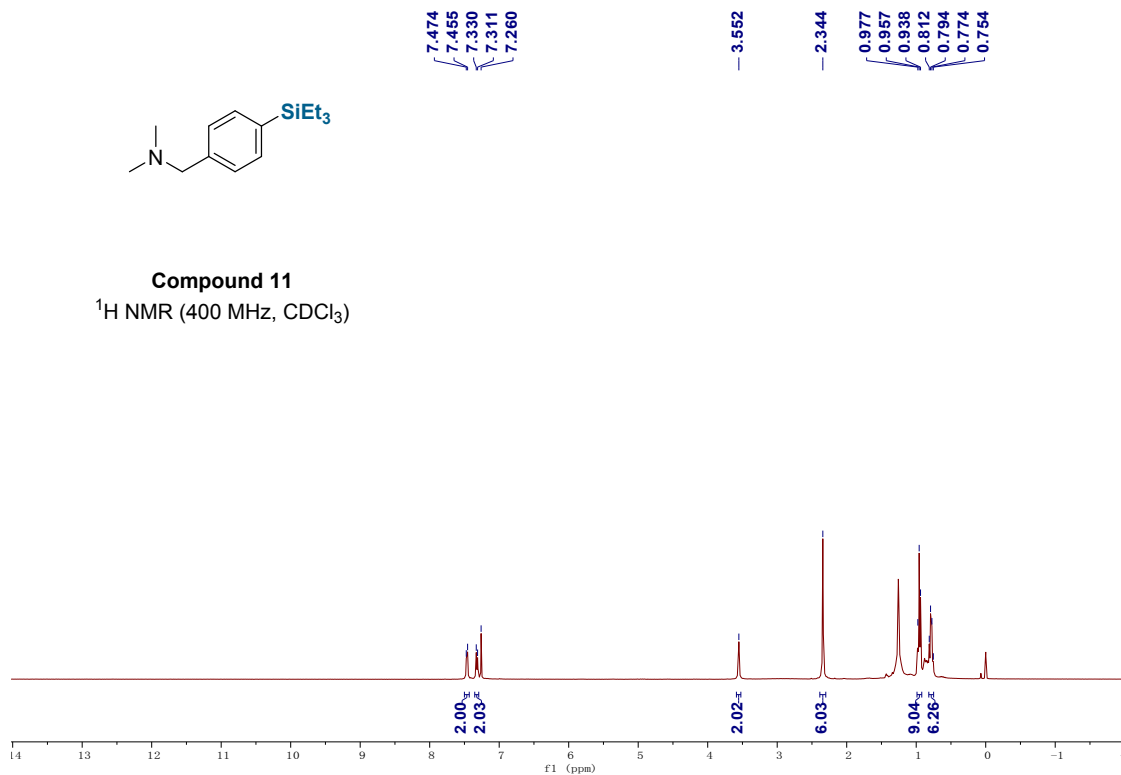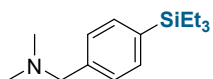

**Compound 11**

<sup>13</sup>C NMR (100 MHz, CDCl<sub>3</sub>)

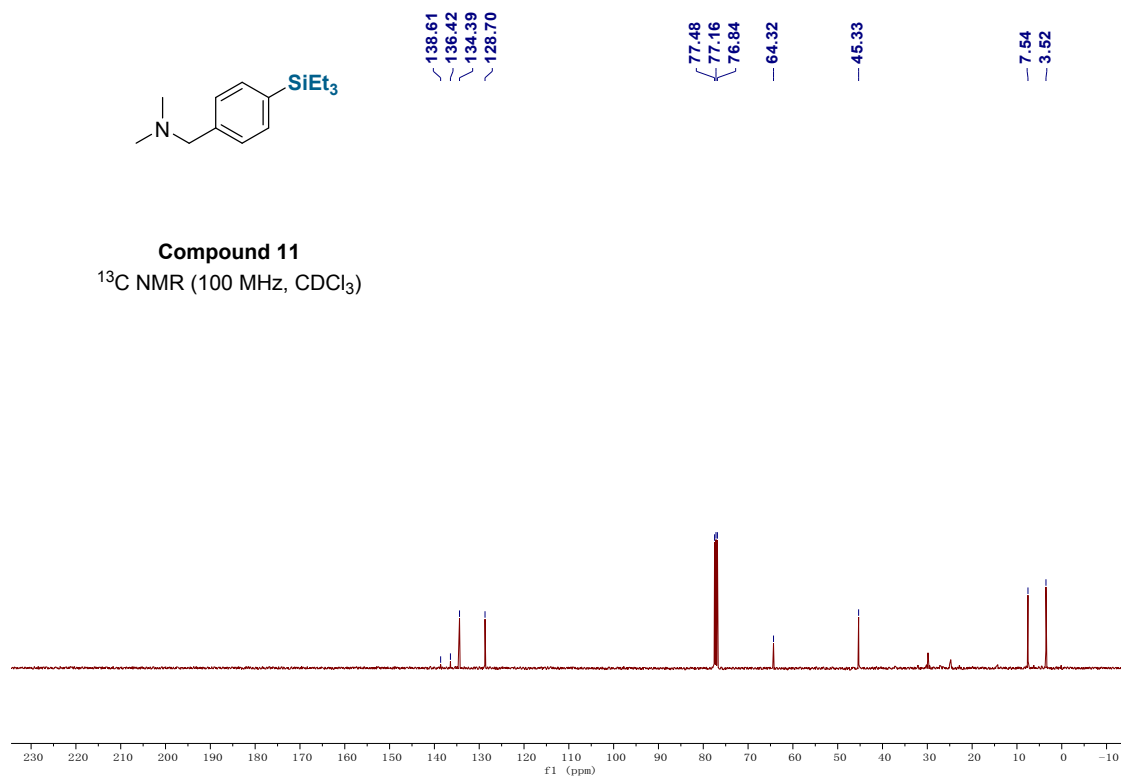

## 2-(4-(Triethylsilyl)phenyl)ethan-1-ol (12)

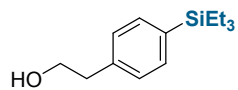

Compound 12

$^1\text{H}$  NMR (400 MHz,  $\text{CDCl}_3$ )

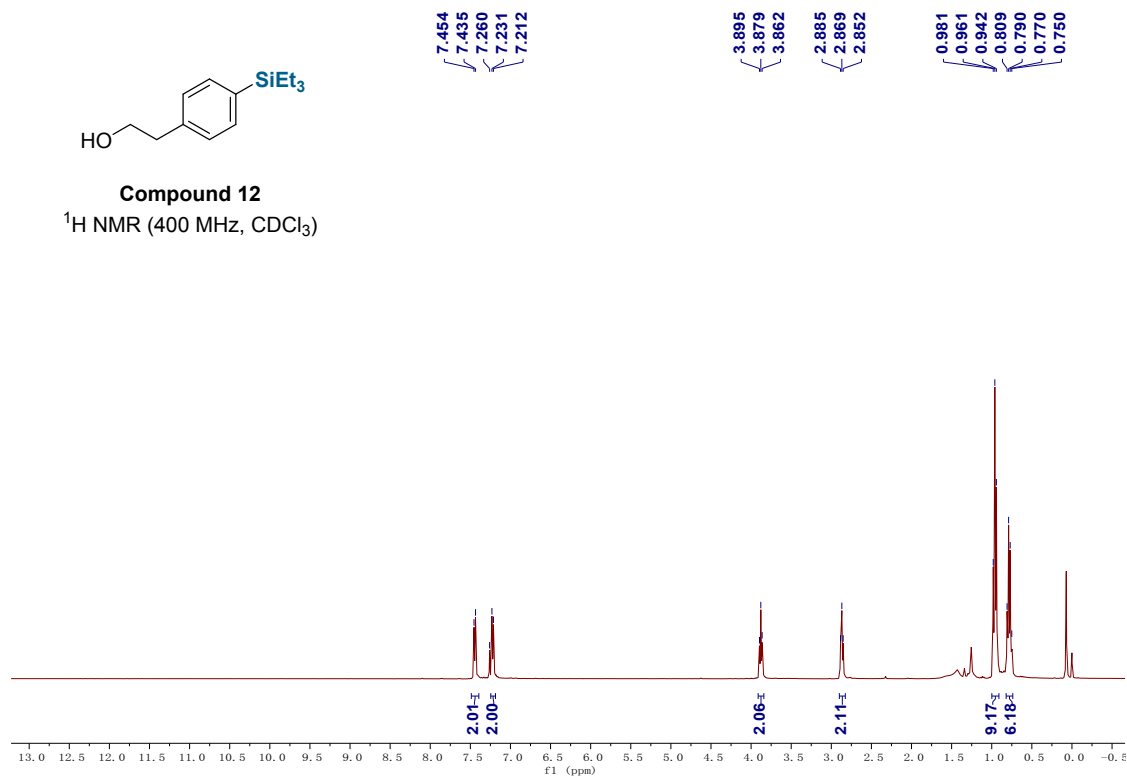

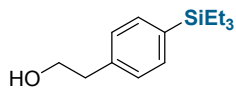

**Compound 12**  
 $^{13}\text{C}$  NMR (100 MHz,  $\text{CDCl}_3$ )

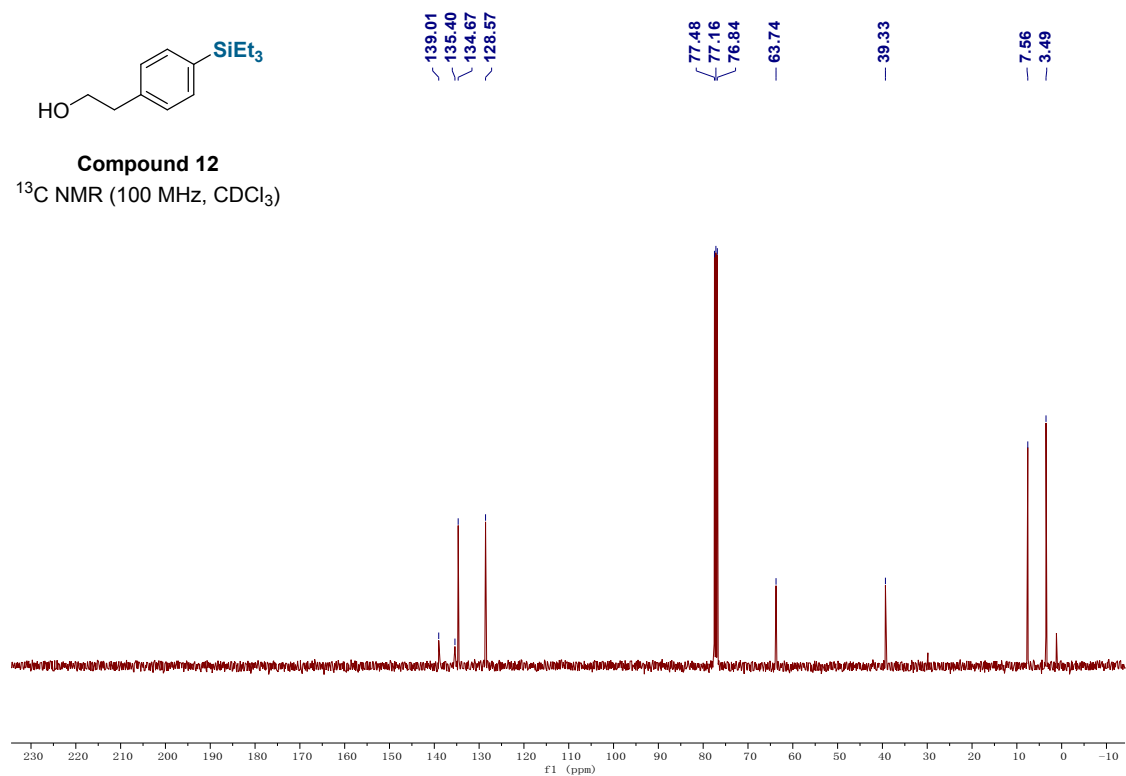

**Triethyl(4-(4,4,5,5-tetramethyl-1,3,2-dioxaborolan-2-yl)phenyl)silane (13)**

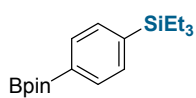

**Compound 13**  
 $^1\text{H}$  NMR (400 MHz,  $\text{CDCl}_3$ )

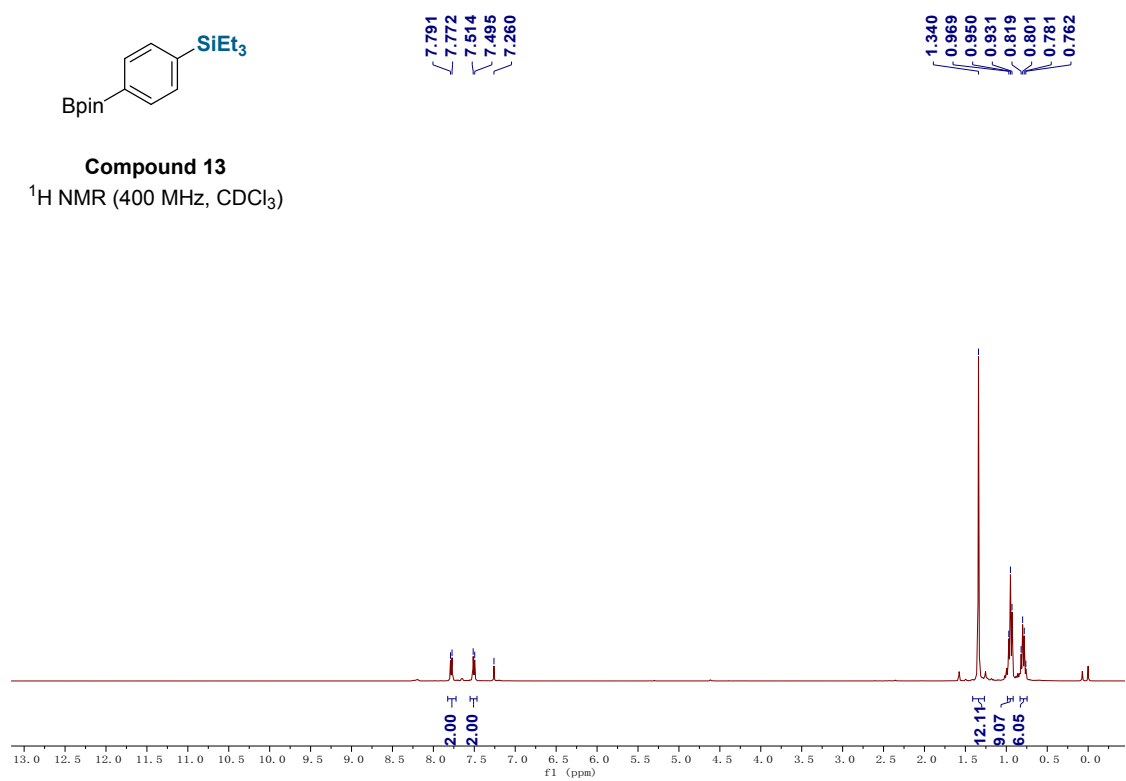

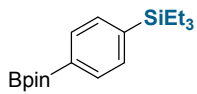

**Compound 13**  
<sup>13</sup>C NMR (100 MHz, CDCl<sub>3</sub>)

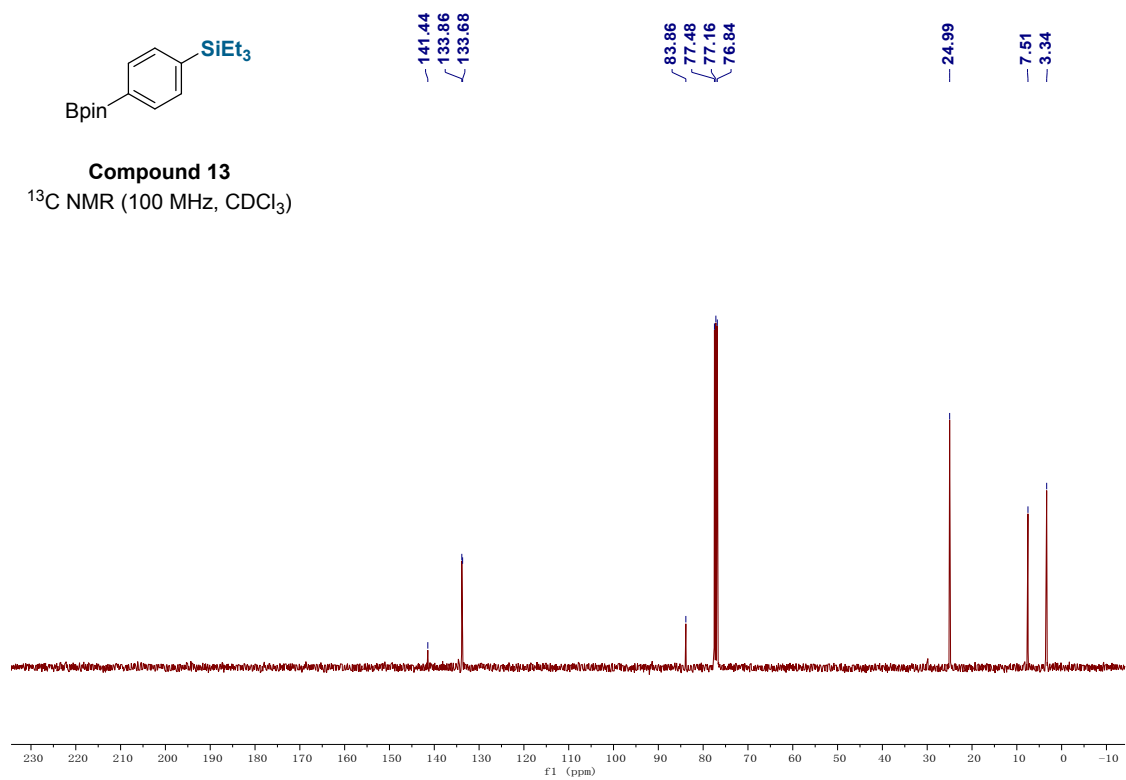

### Triethyl(4-(trimethylsilyl)phenyl)silane (14)

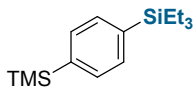

**Compound 14**  
 $^1\text{H}$  NMR (400 MHz,  $\text{CDCl}_3$ )

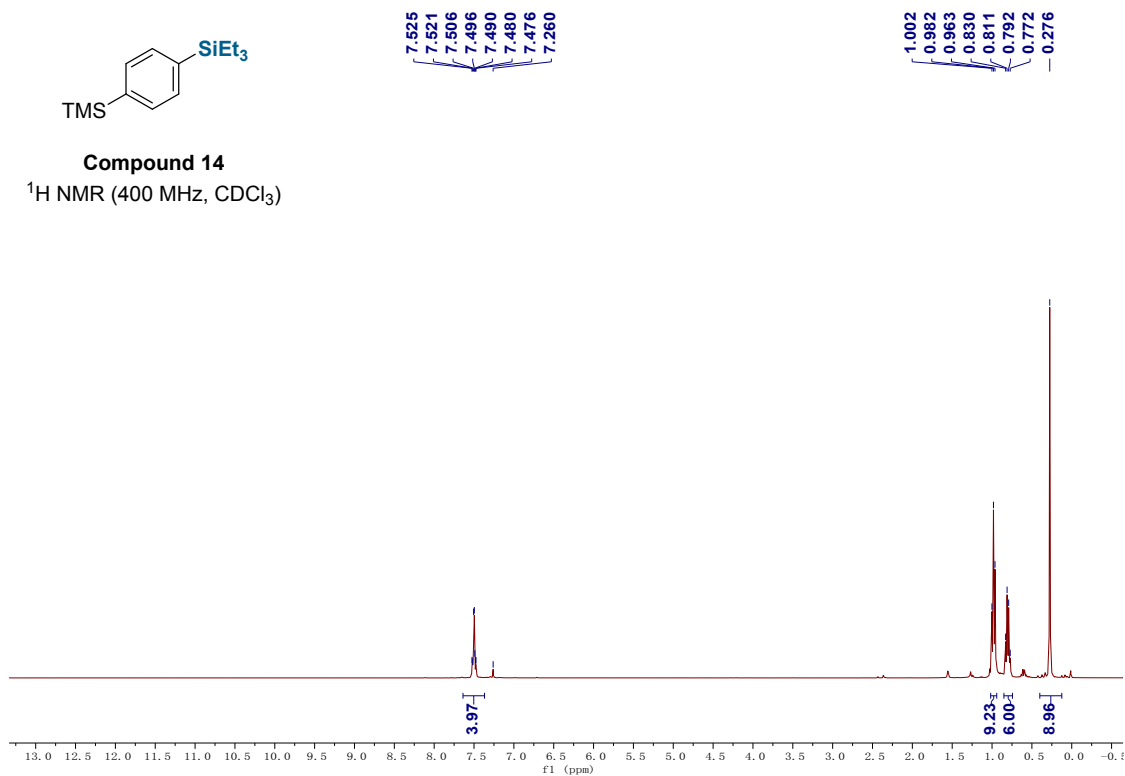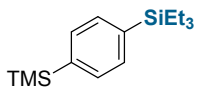

**Compound 14**  
 $^{13}\text{C}$  NMR (100 MHz,  $\text{CDCl}_3$ )

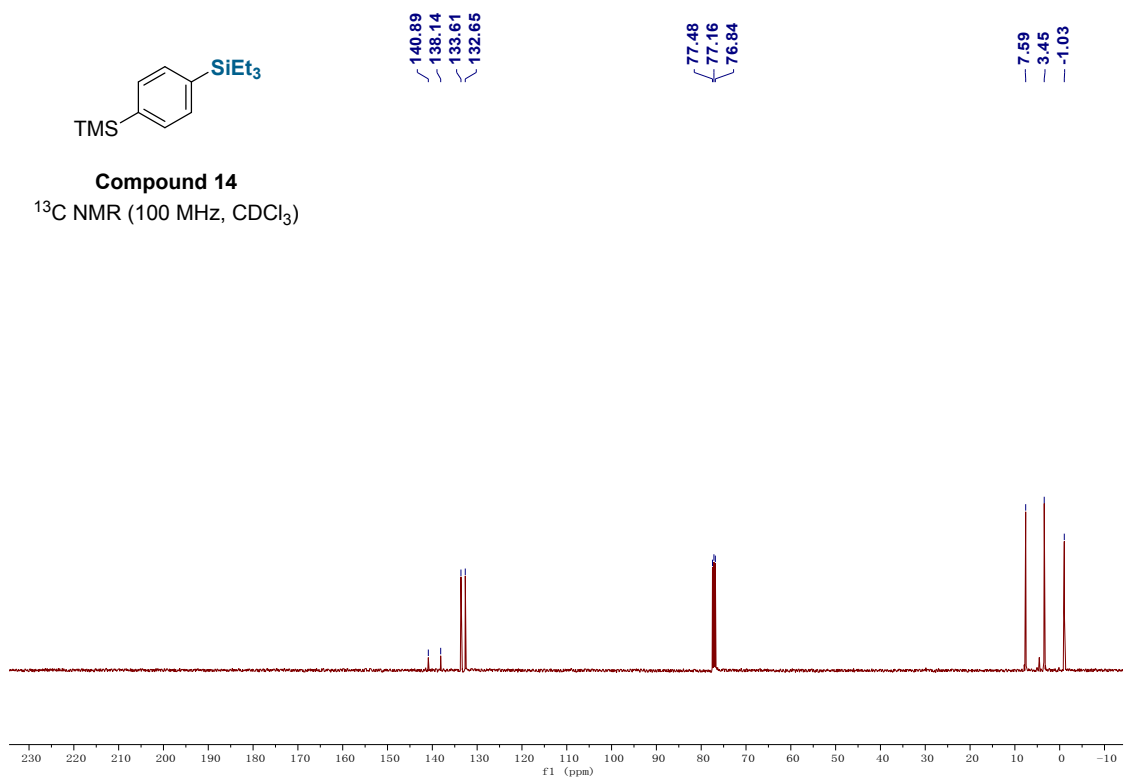



# [1,1'-Biphenyl]-4-yltriethylsilane (15)

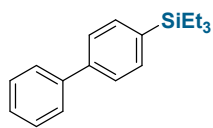

**Compound 15**  
 $^1\text{H NMR}$  (400 MHz,  $\text{CDCl}_3$ )

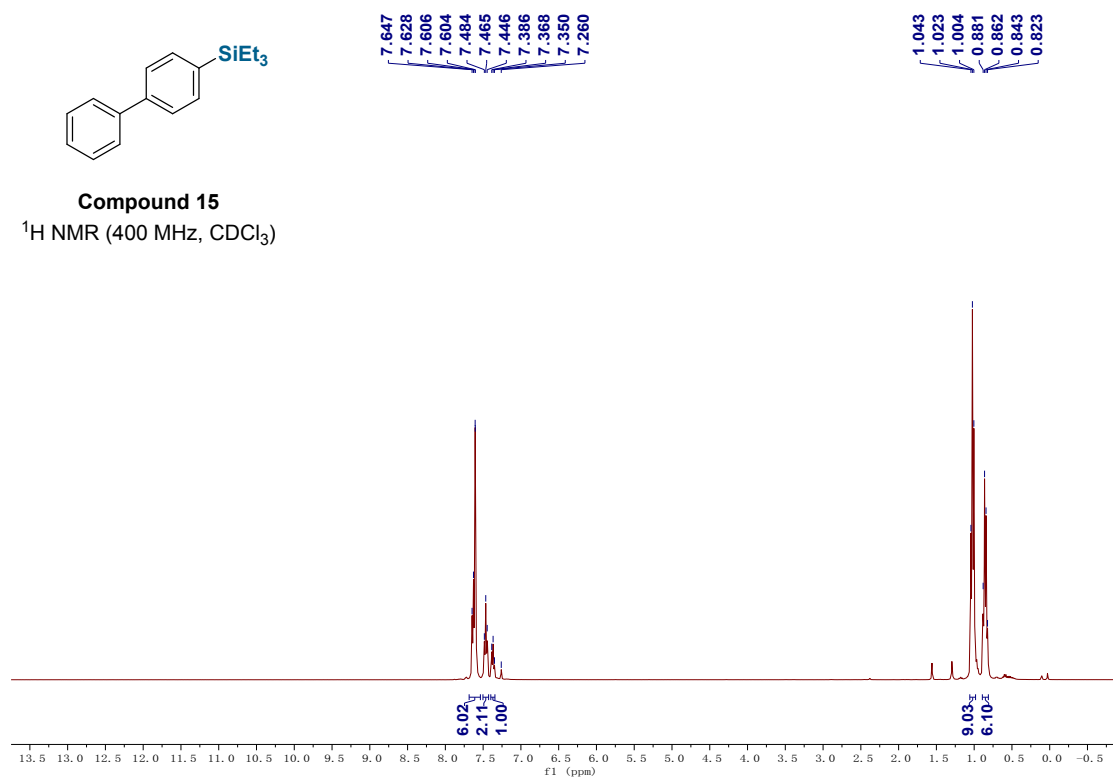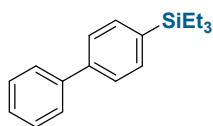

**Compound 15**  
 $^{13}\text{C NMR}$  (100 MHz,  $\text{CDCl}_3$ )

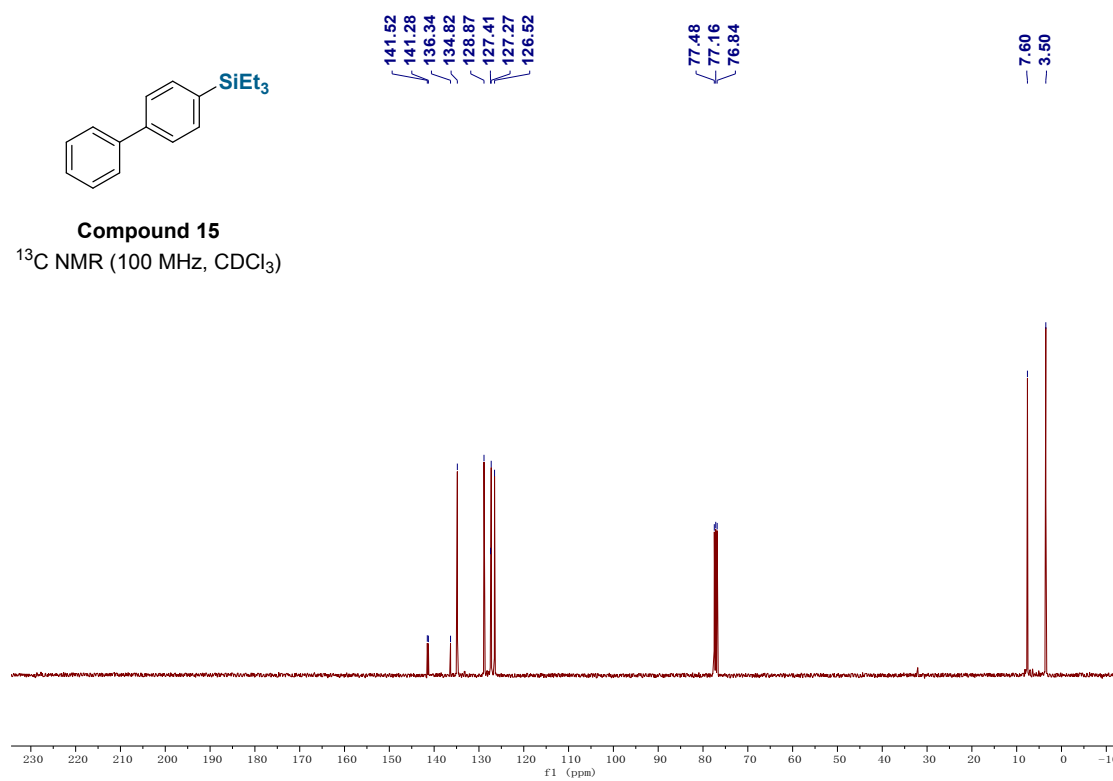

# Triethyl(4'-methoxy-[1,1'-biphenyl]-4-yl)silane (16)

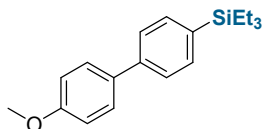

**Compound 16**

$^1\text{H}$  NMR (400 MHz,  $\text{CDCl}_3$ )

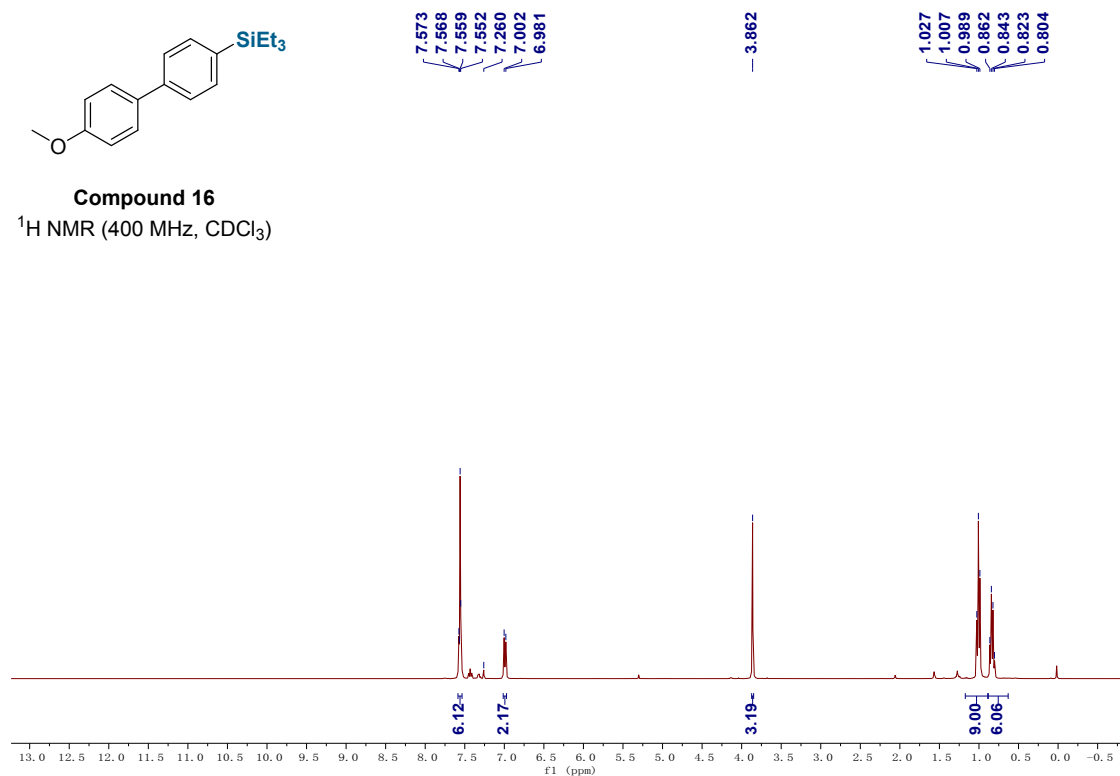

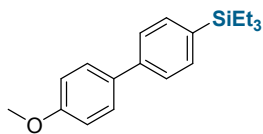

**Compound 16**  
 $^{13}\text{C}$  NMR (100 MHz,  $\text{CDCl}_3$ )

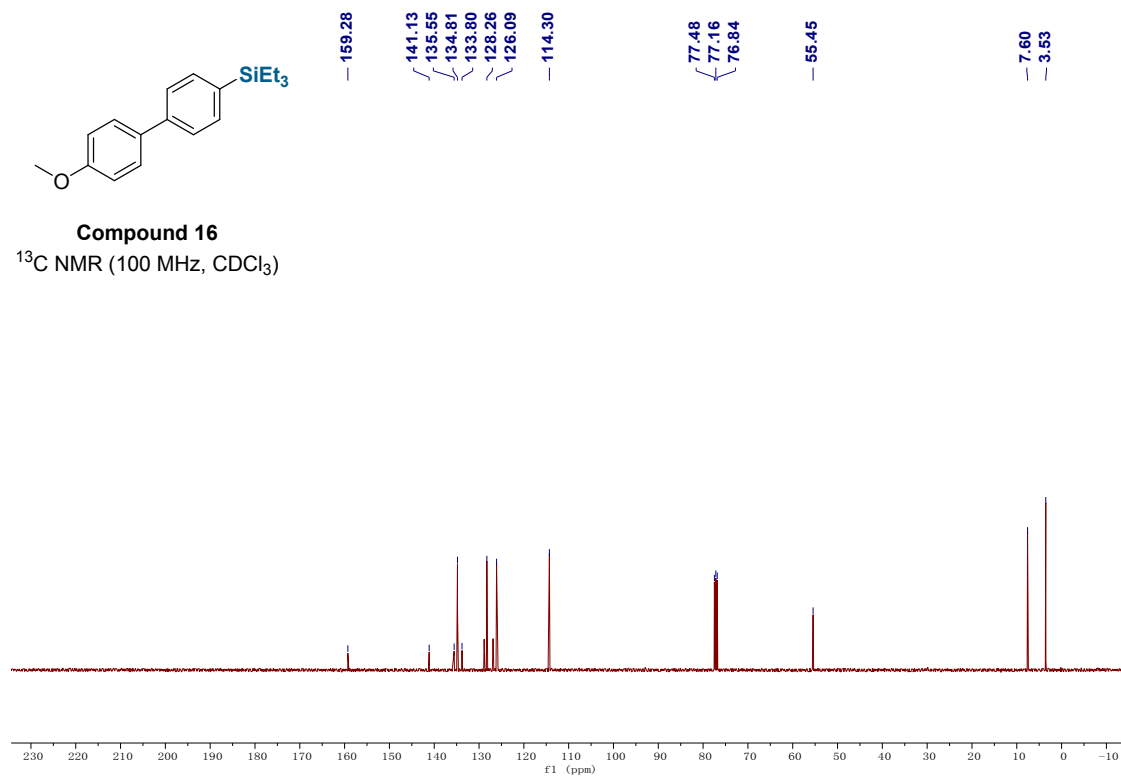

**Triethyl(4'-phenoxy-[1,1'-biphenyl]-4-yl)silane (17)**

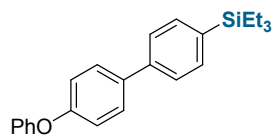

**Compound 17**  
 $^1\text{H}$  NMR (400 MHz,  $\text{CDCl}_3$ )

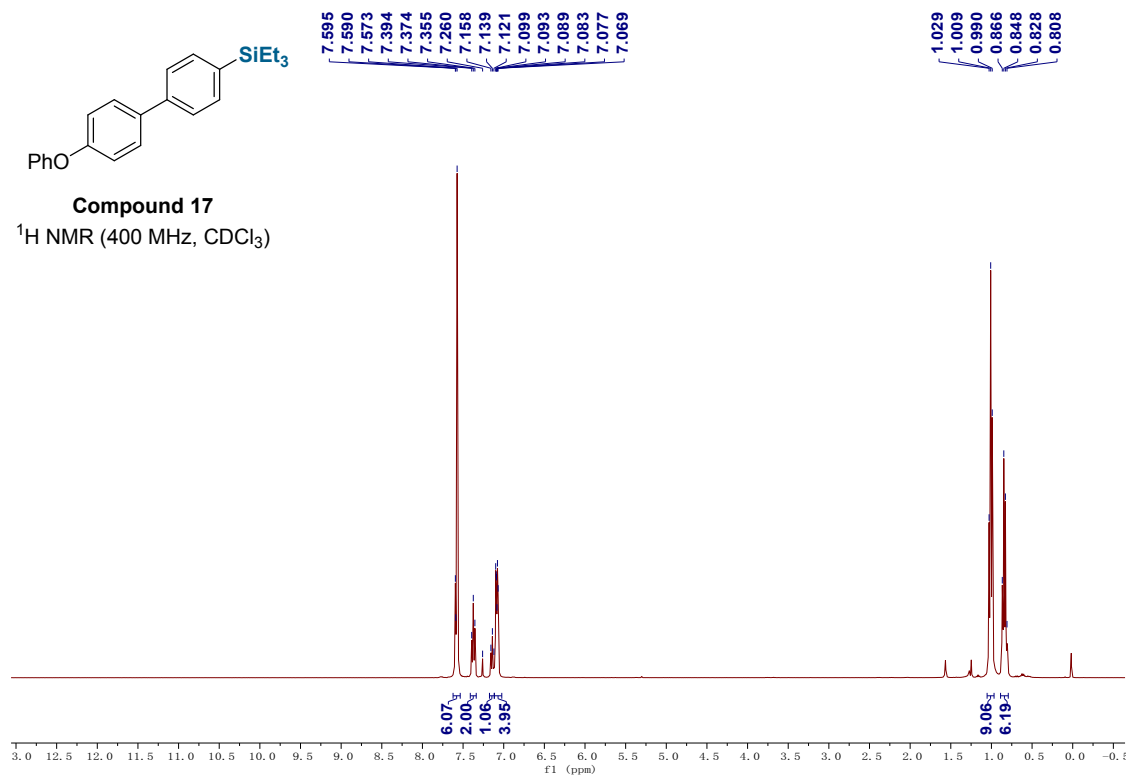

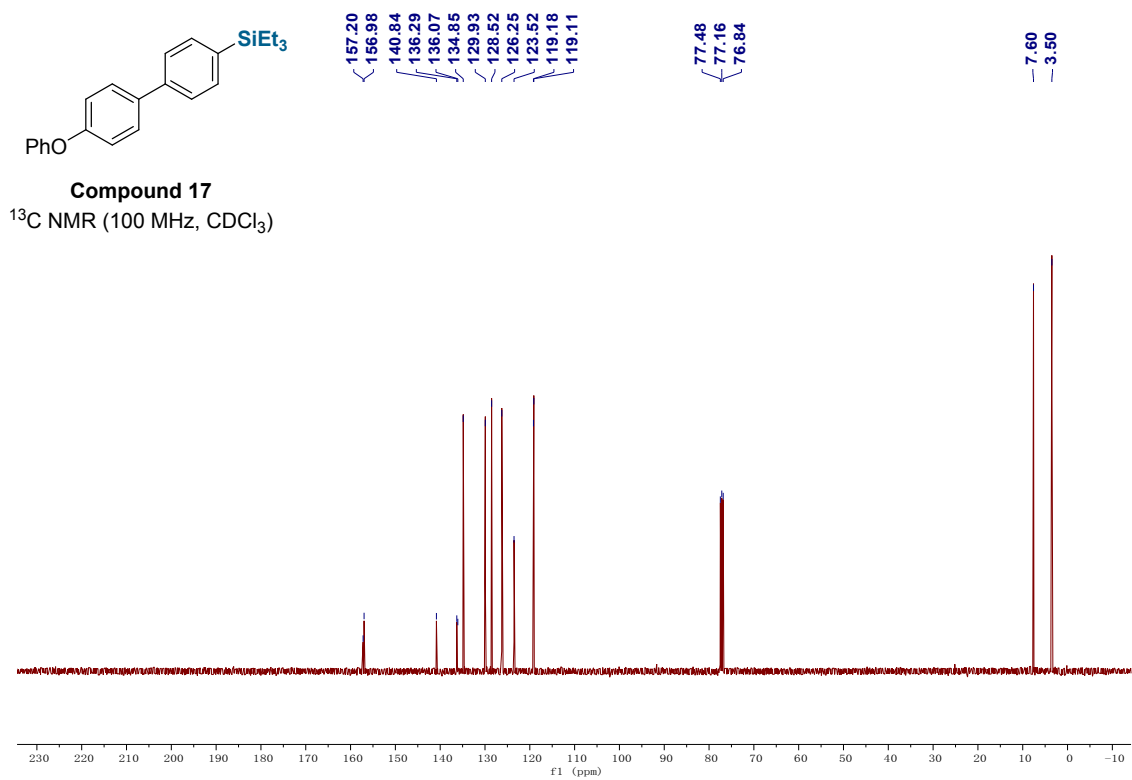

**(4'-(Tert-butyl)-[1,1'-biphenyl]-4-yl)triethylsilane (18)**

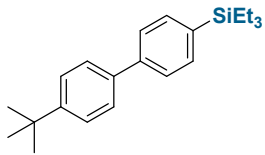

**Compound 18**  
 $^1\text{H}$  NMR (400 MHz,  $\text{CDCl}_3$ )

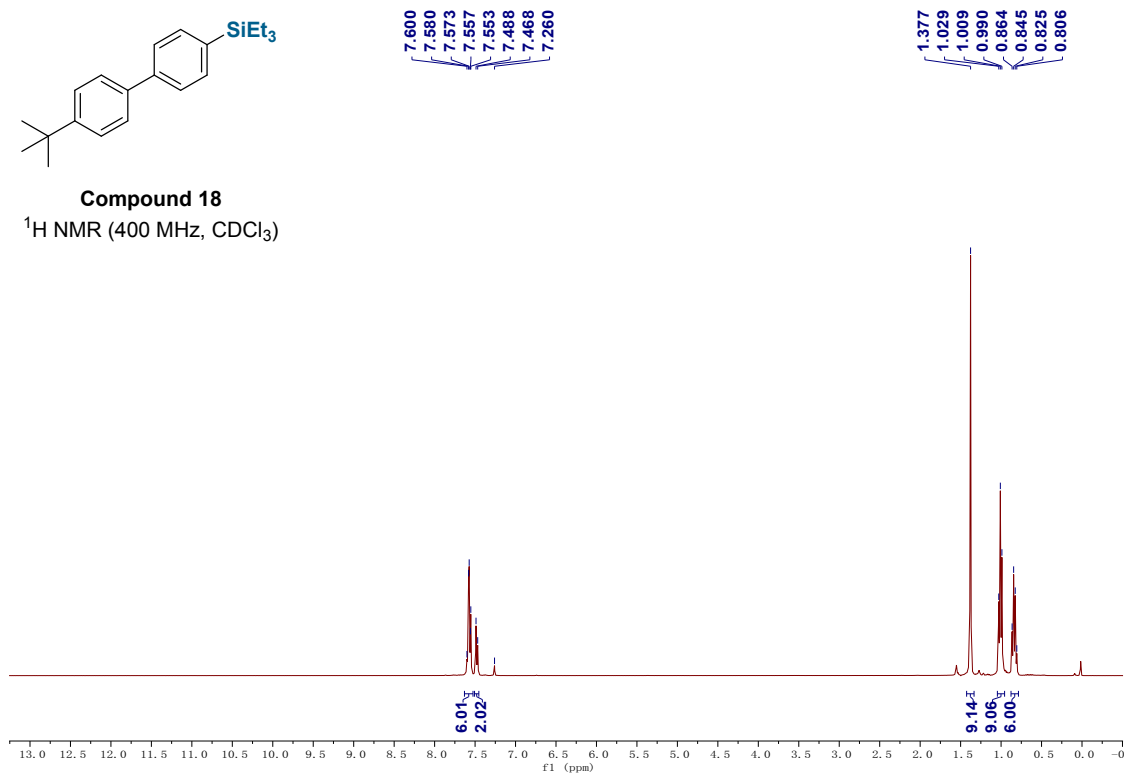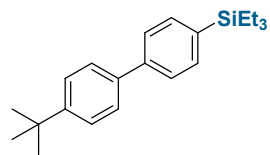

**Compound 18**  
 $^{13}\text{C}$  NMR (100 MHz,  $\text{CDCl}_3$ )

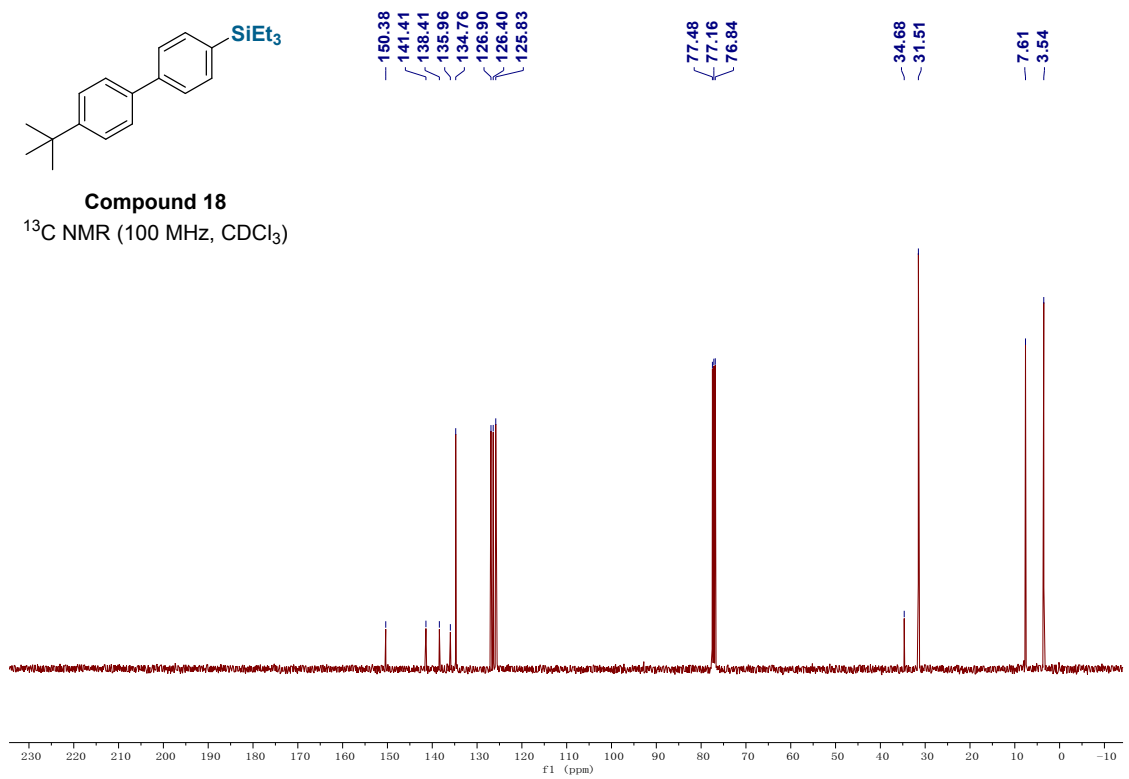

# Triethyl(4'-(trifluoromethyl)-[1,1'-biphenyl]-4-yl)silane (19)

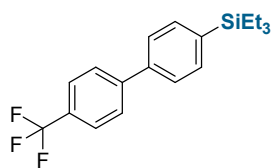

**Compound 19**

$^1\text{H NMR}$  (400 MHz,  $\text{CDCl}_3$ )

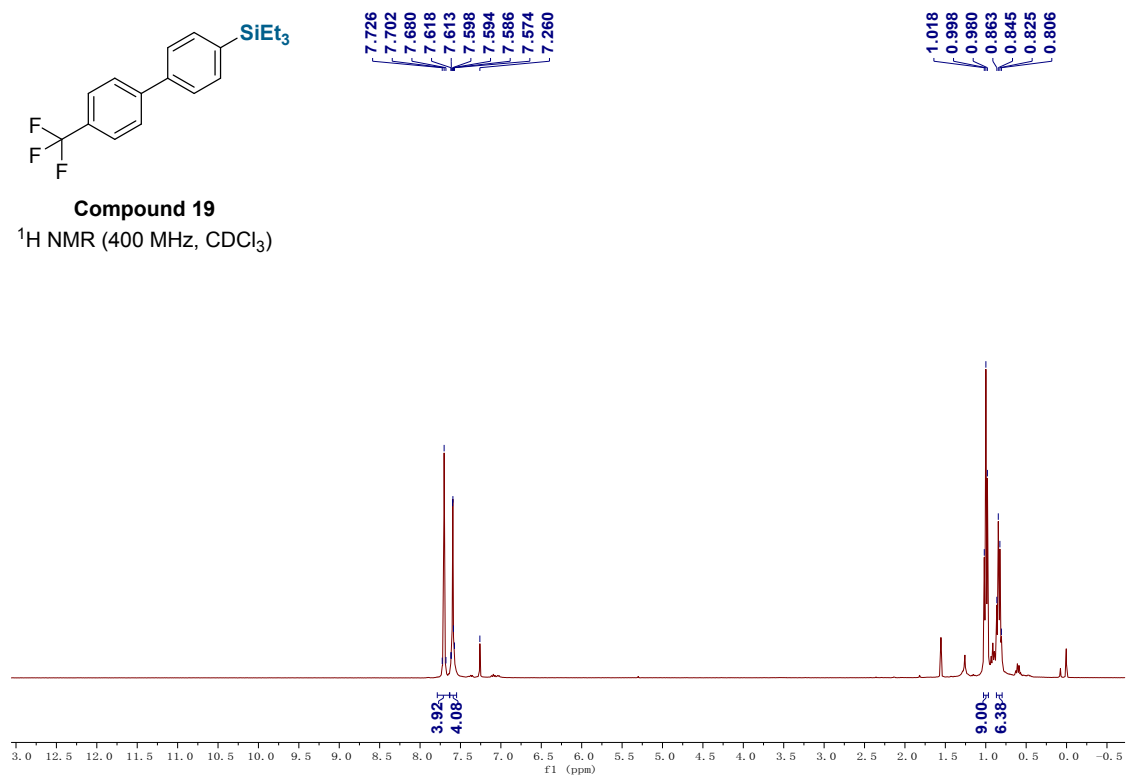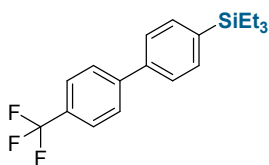

**Compound 19**

$^{13}\text{C NMR}$  (100 MHz,  $\text{CDCl}_3$ )

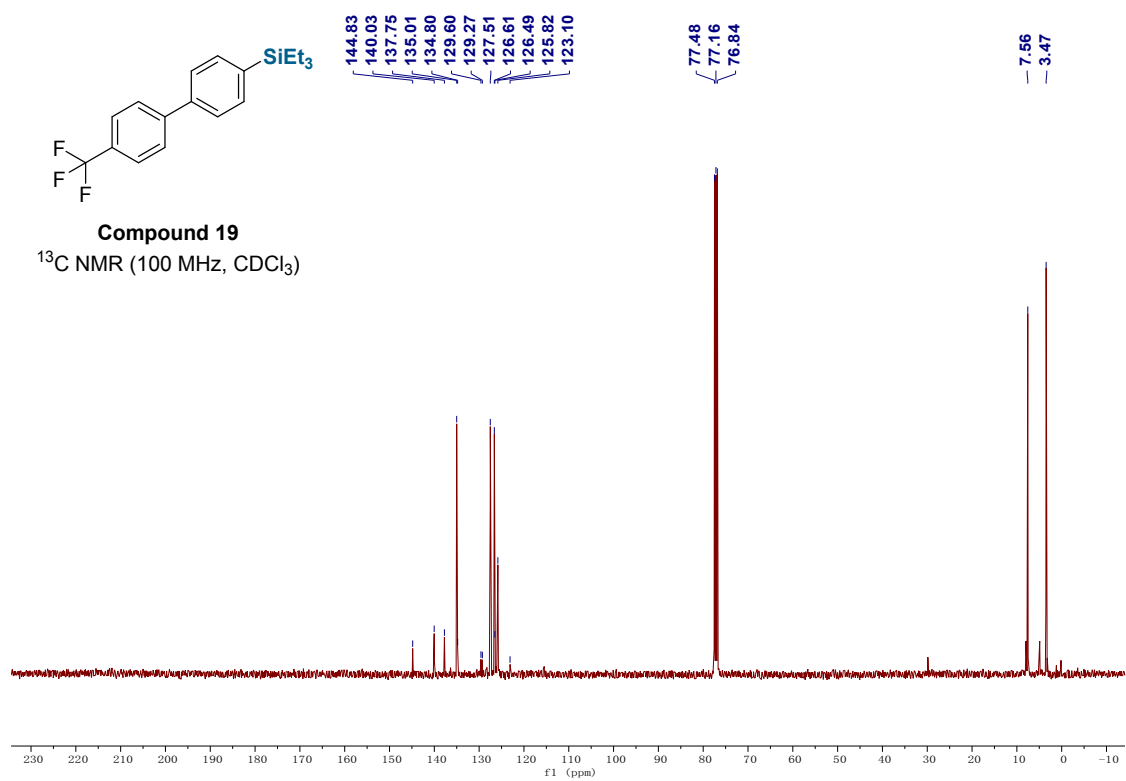

# [1,1':4',1''-Terphenyl]-4-yltriethylsilane (20)

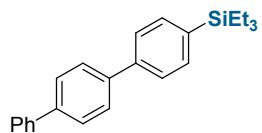

**Compound 20**

<sup>1</sup>H NMR (400 MHz, CDCl<sub>3</sub>)

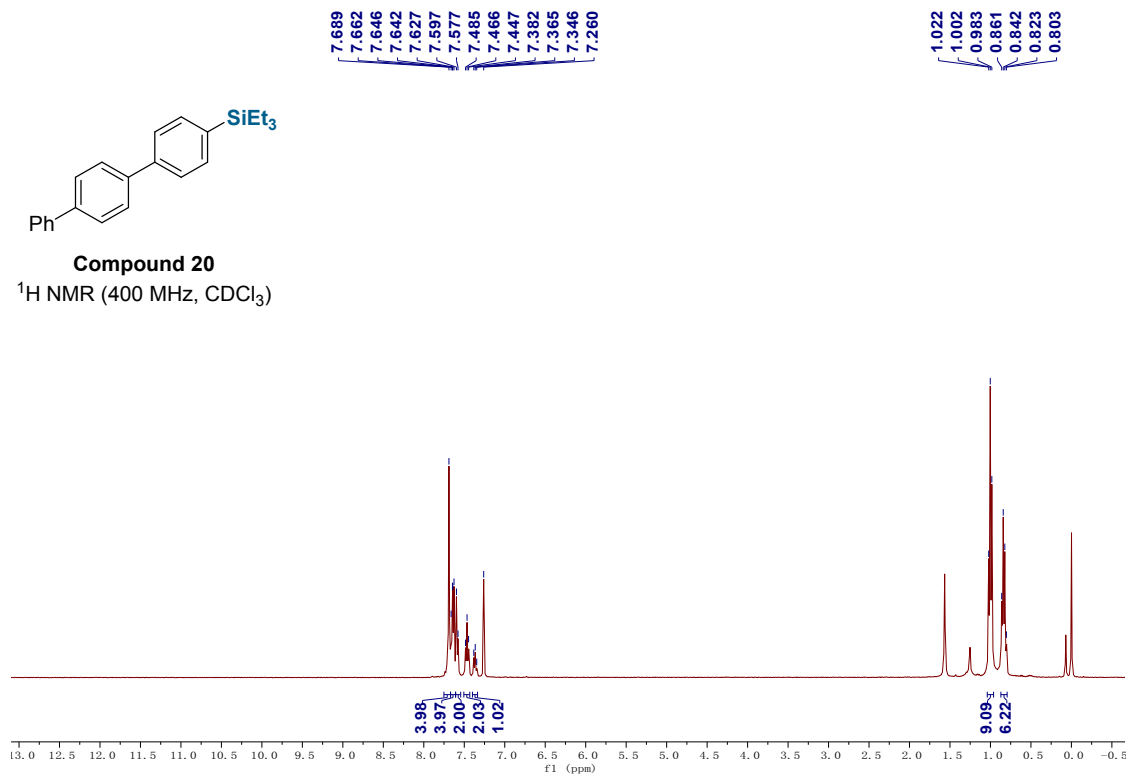

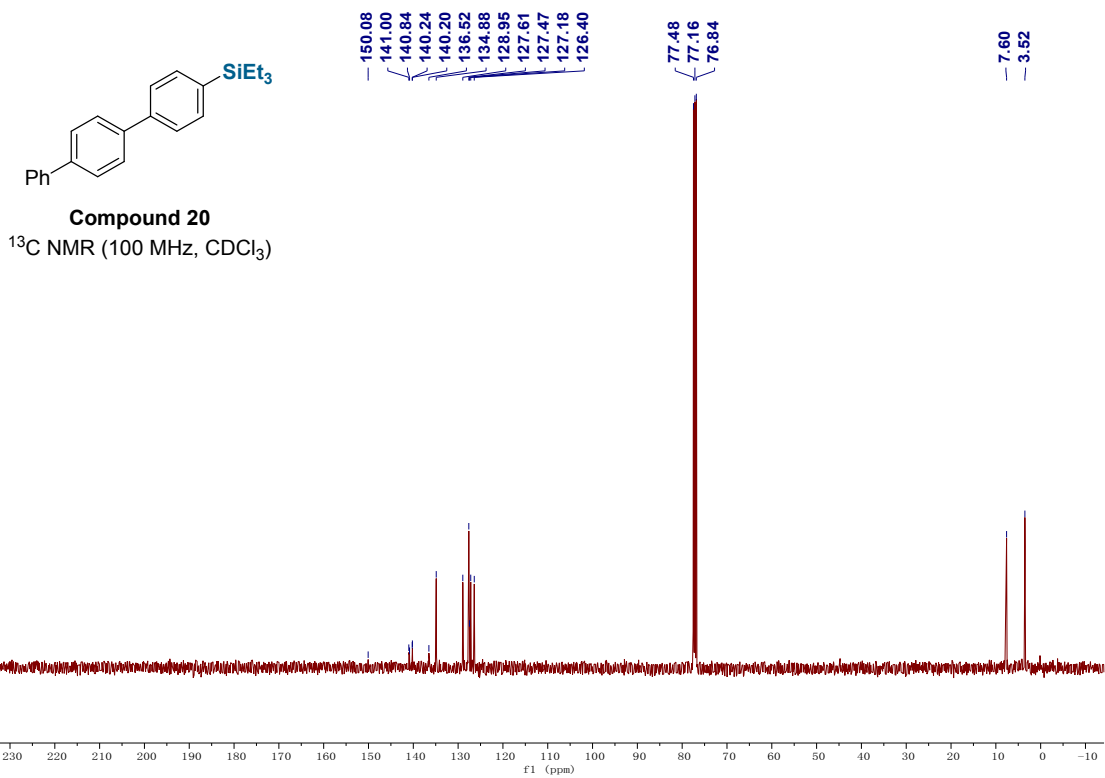

**4-(4'-(Triethylsilyl)-[1,1'-biphenyl]-4-yl)morpholine (21)**

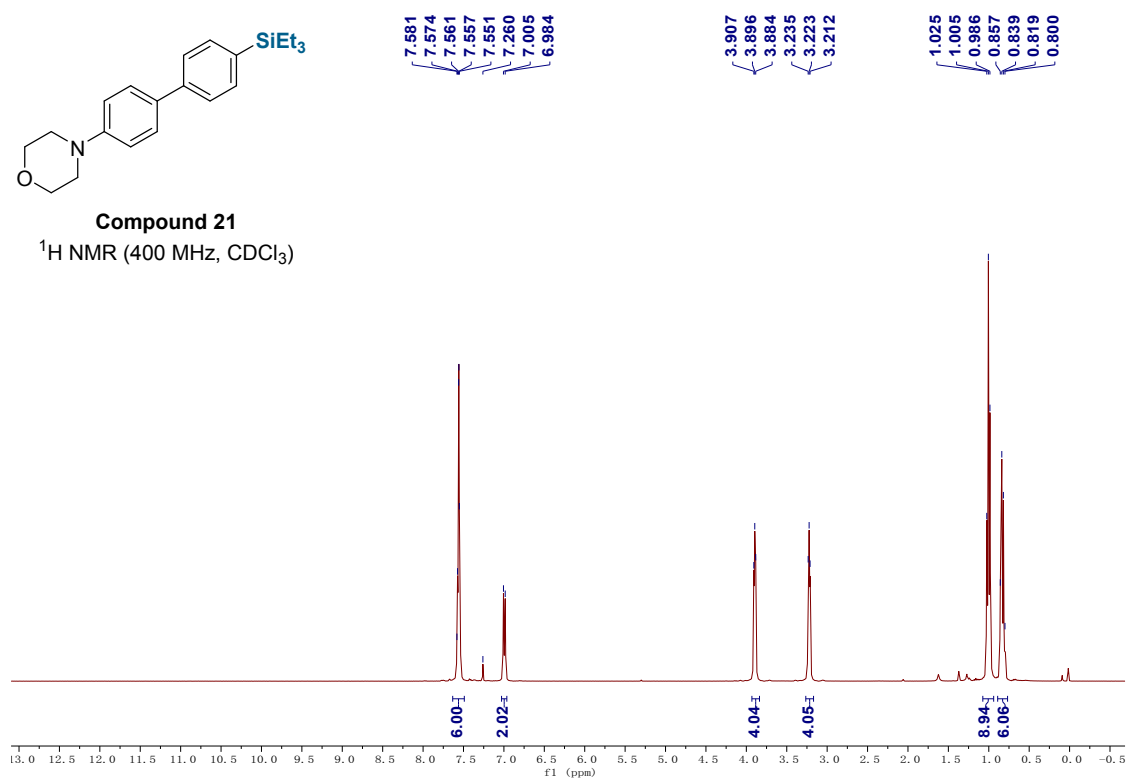



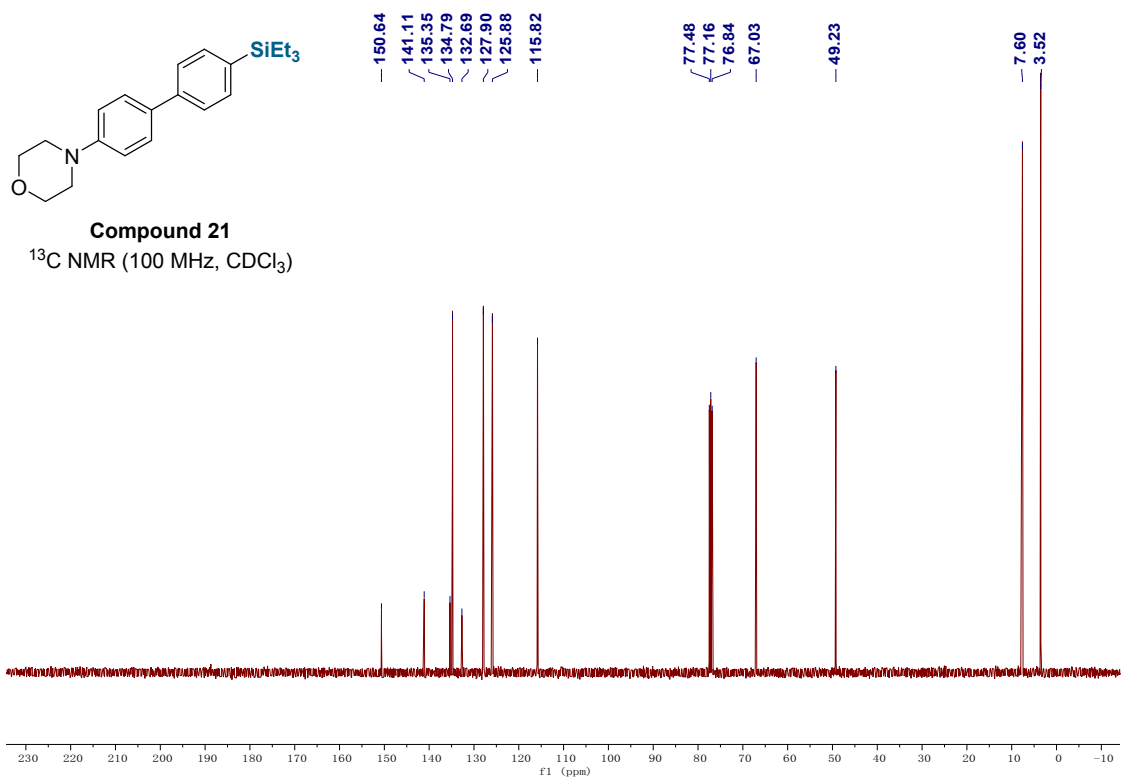

### Triethyl(4-(naphthalen-1-yl)phenyl)silane (22)

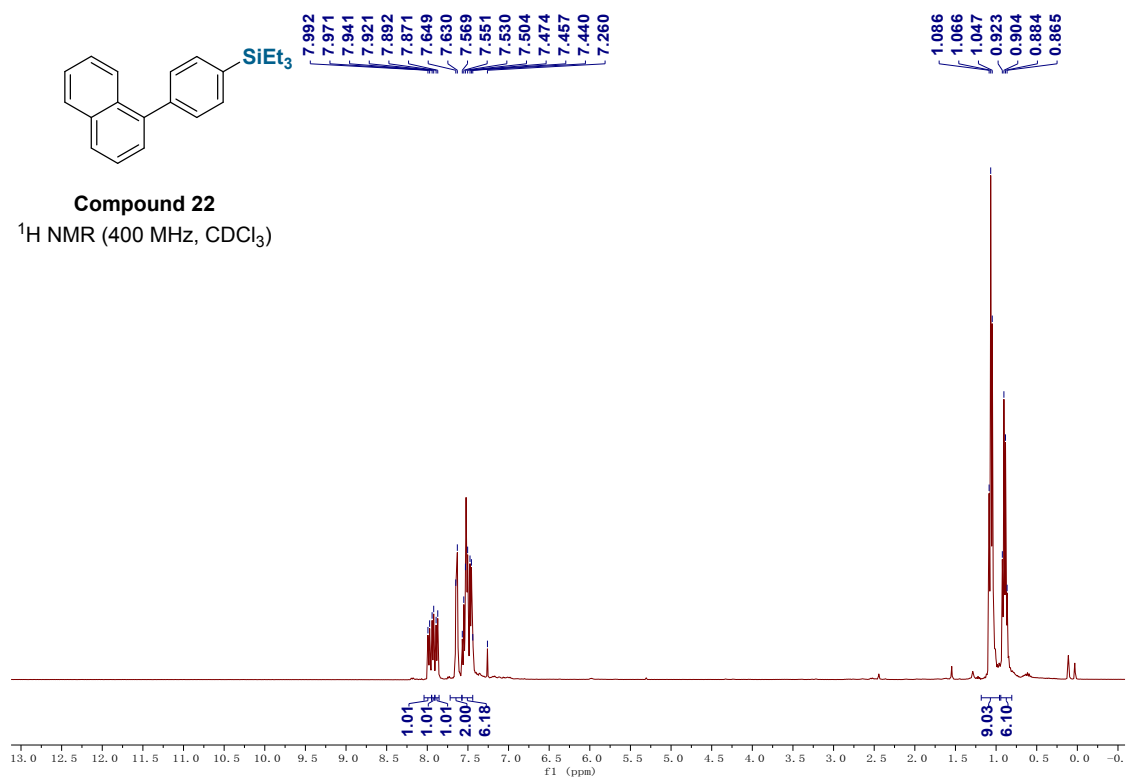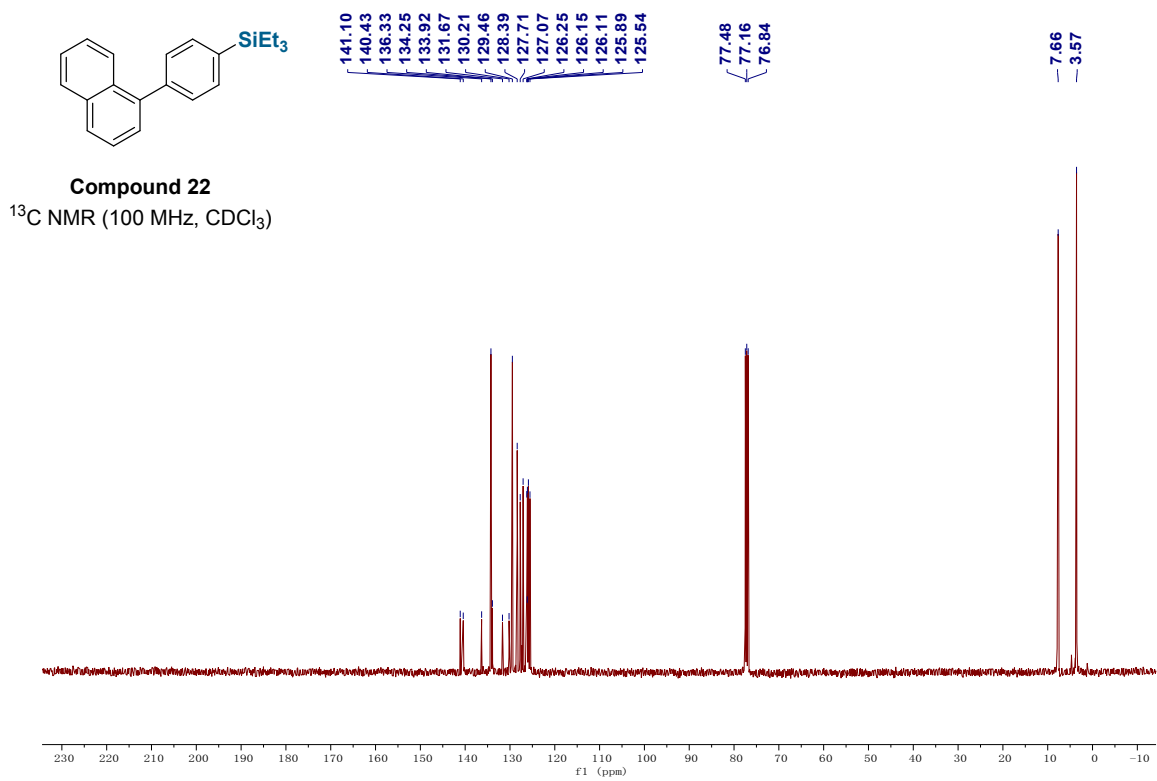

# Triethyl(4-(naphthalen-2-yl)phenyl)silane (23)

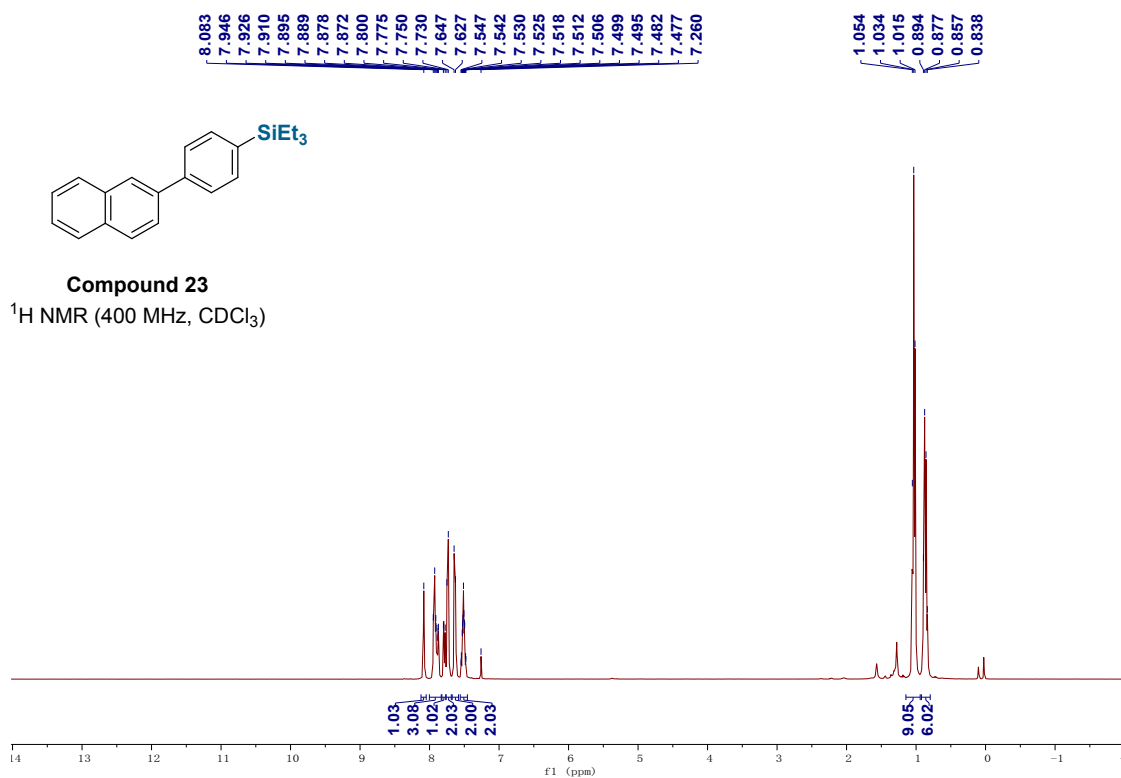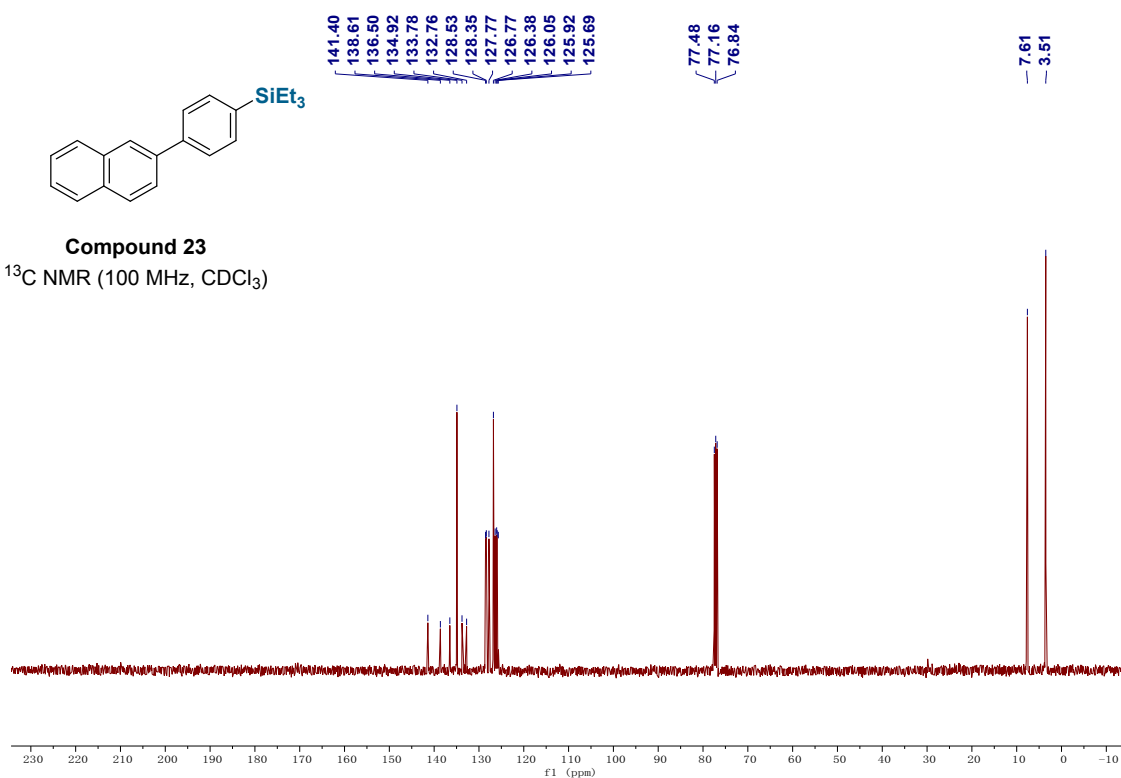

# 1-Isopropyl-3-(4-(triethylsilyl)phenyl)-1H-indole (24)

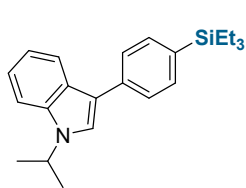

**Compound 24**

$^1\text{H}$  NMR (400 MHz,  $\text{CDCl}_3$ )

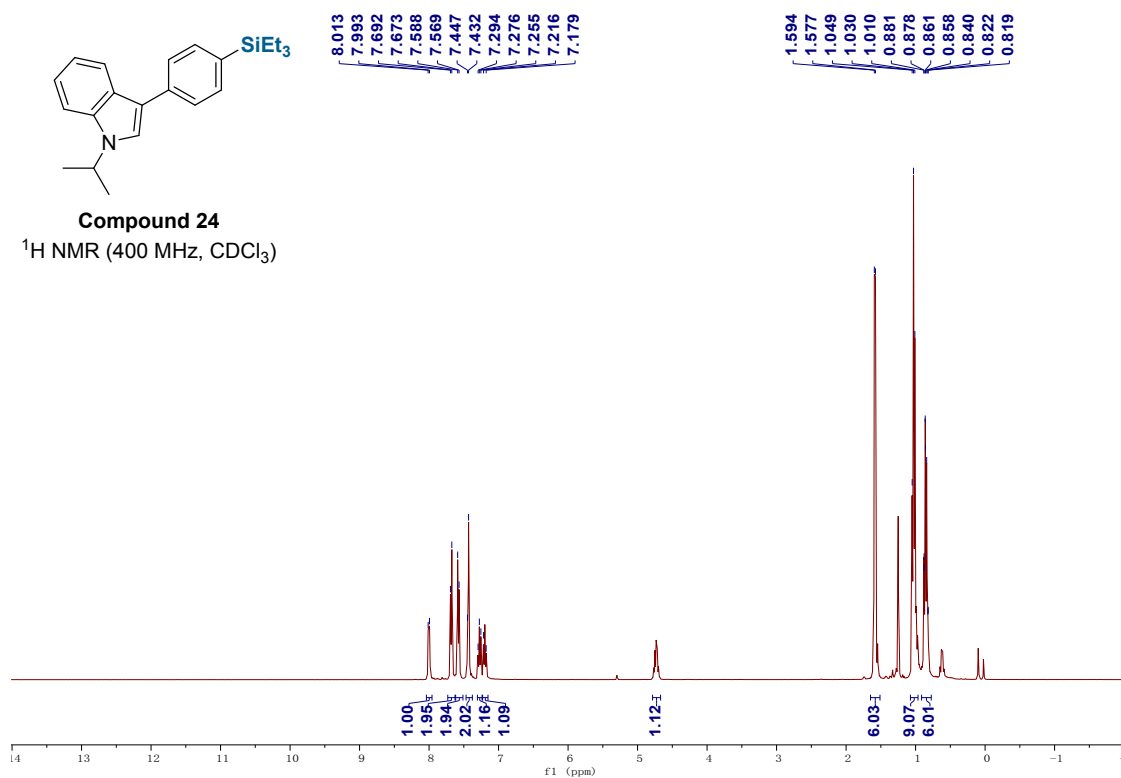

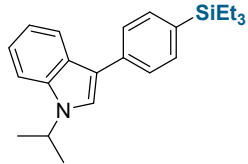

**Compound 24**

$^{13}\text{C}$  NMR (100 MHz,  $\text{CDCl}_3$ )

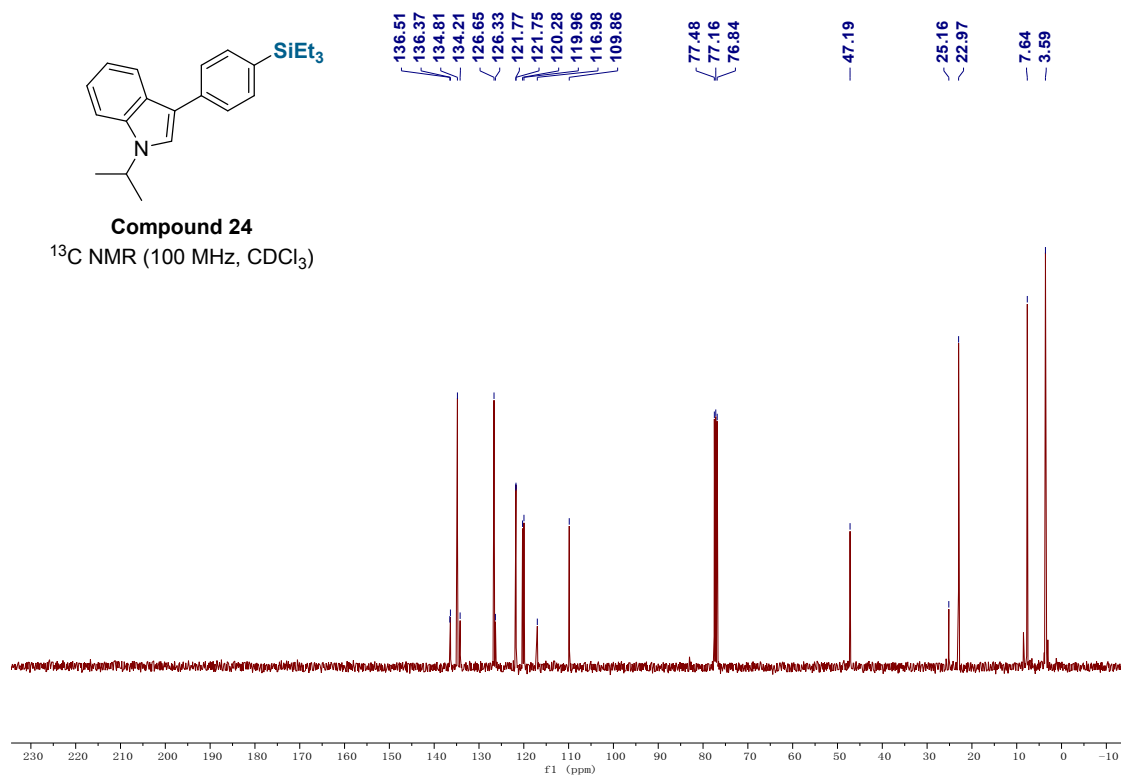

**(4-(Benzo[b]thiophen-2-yl)phenyl)triethylsilane (25)**

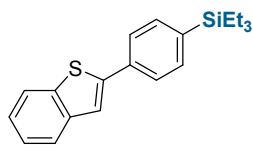

**Compound 25**

$^1\text{H}$  NMR (400 MHz,  $\text{CDCl}_3$ )

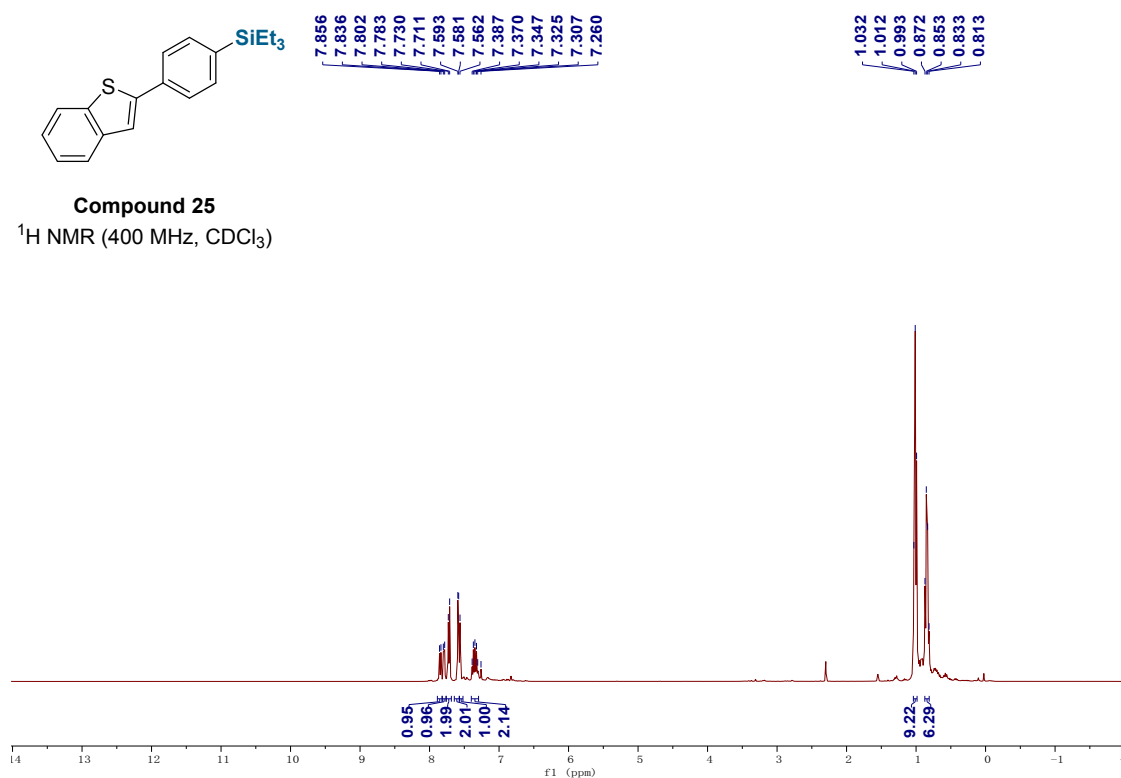

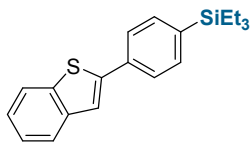

**Compound 25**  
 $^{13}\text{C}$  NMR (100 MHz,  $\text{CDCl}_3$ )

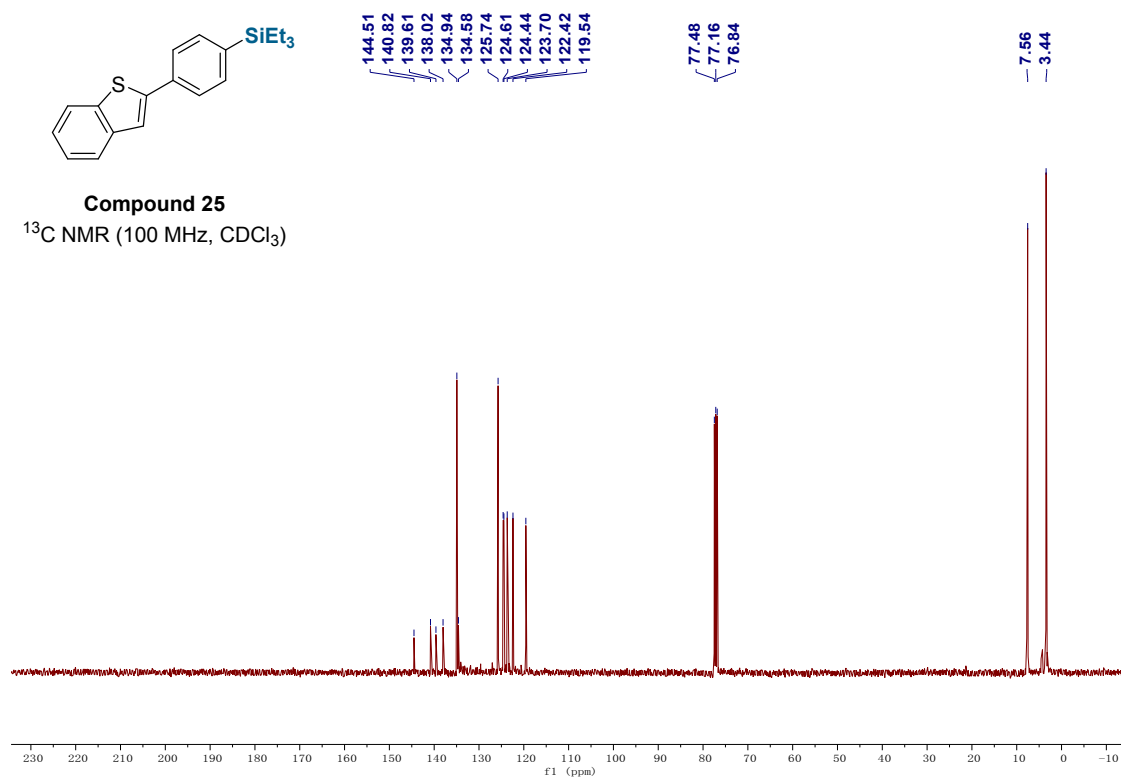

### 1-(4-(Triethylsilyl)phenyl)-1H-pyrrole (26)

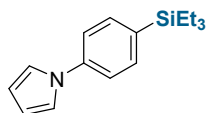

**Compound 26**  
 $^1\text{H}$  NMR (400 MHz,  $\text{CDCl}_3$ )

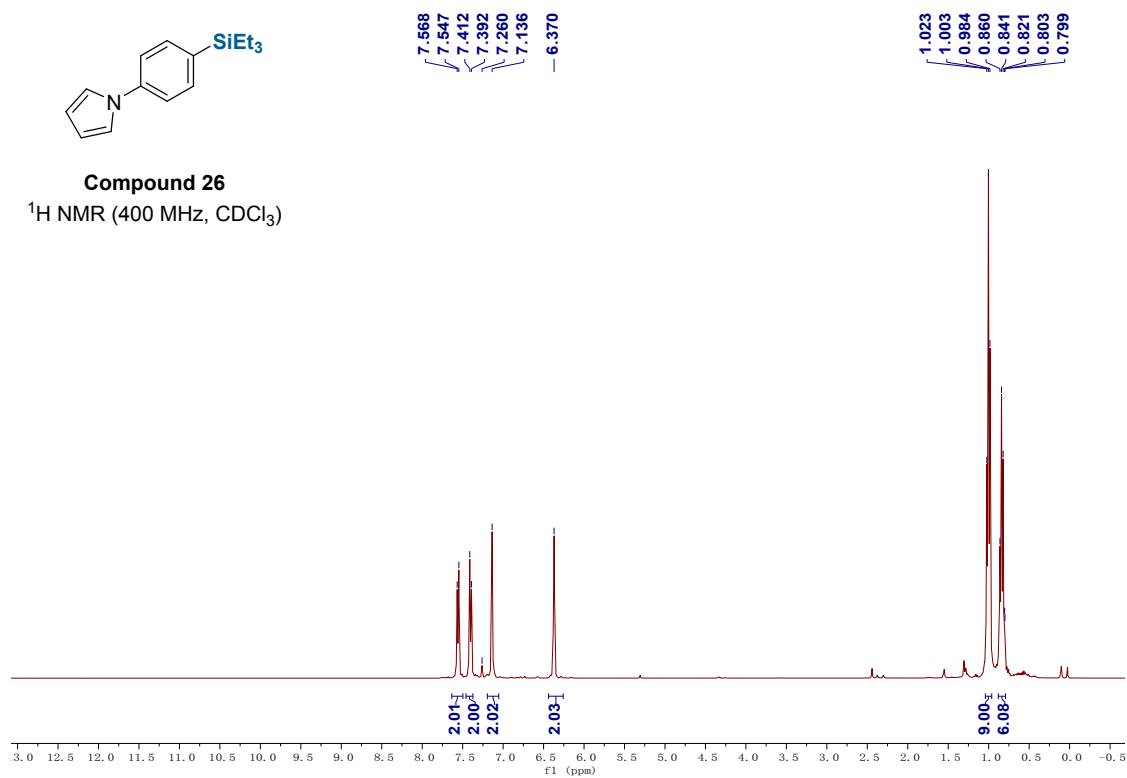

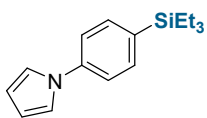

**Compound 26**  
 $^{13}\text{C}$  NMR (100 MHz,  $\text{CDCl}_3$ )

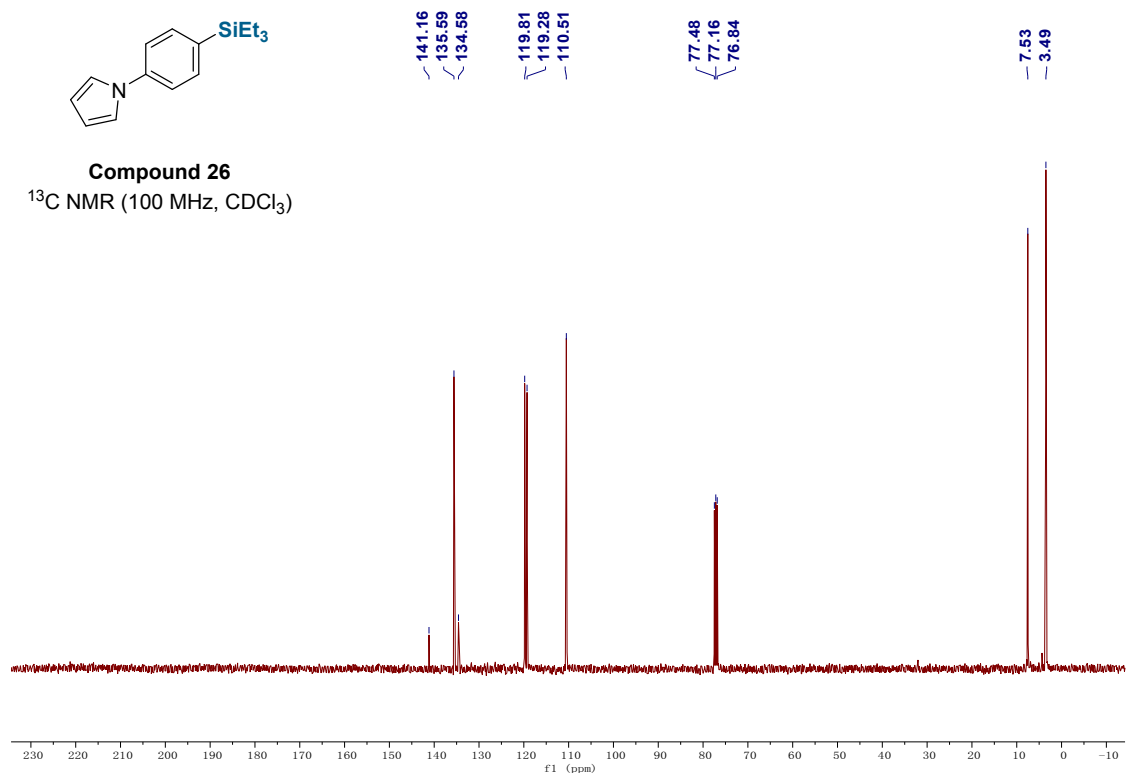

### Triethyl(naphthalen-2-yl)silane (27)

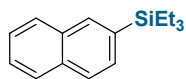

8.002  
7.872  
7.864  
7.858  
7.850  
7.844  
7.835  
7.824  
7.601  
7.581  
7.504  
7.496  
7.488  
7.480  
7.260

1.039  
1.020  
1.001  
0.926  
0.909  
0.890  
0.868

**Compound 27**  
 $^1\text{H}$  NMR (400 MHz,  $\text{CDCl}_3$ )

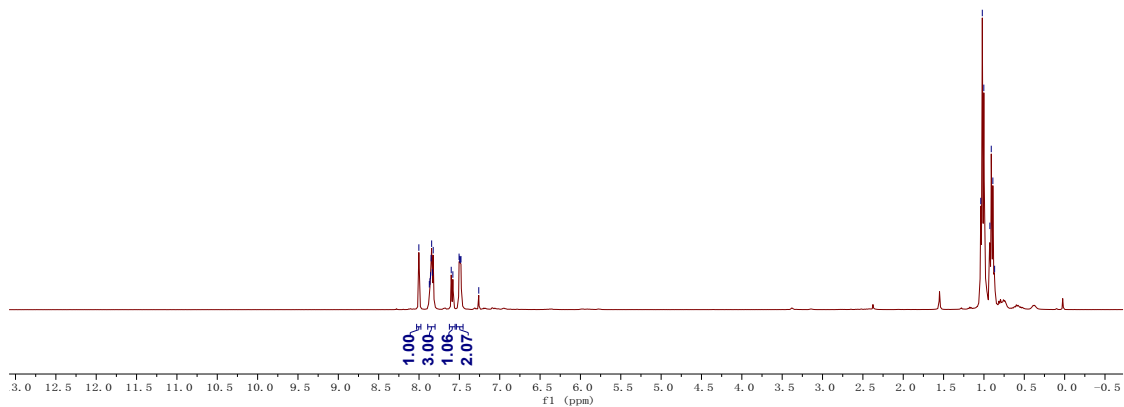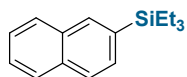

135.12  
134.94  
133.75  
133.08  
130.74  
128.14  
127.82  
126.88  
126.27  
125.88

77.48  
77.16  
76.84

7.61  
3.53

**Compound 27**  
 $^{13}\text{C}$  NMR (100 MHz,  $\text{CDCl}_3$ )

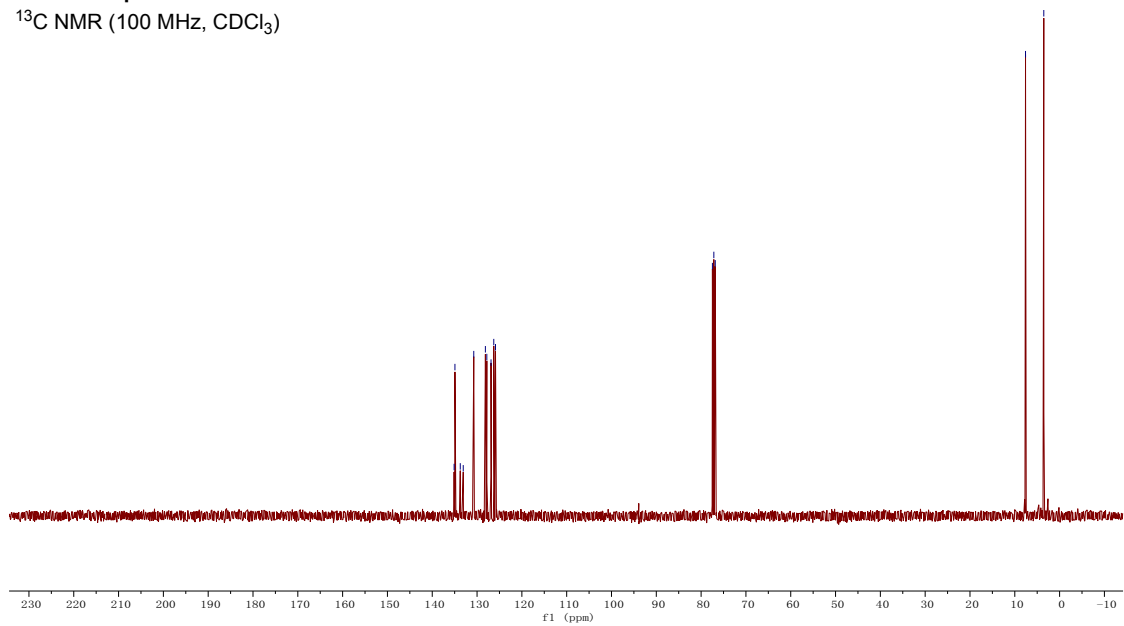



# Triethyl(naphthalen-1-yl)silane (28)

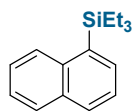

**Compound 28**

<sup>1</sup>H NMR (400 MHz, CDCl<sub>3</sub>)

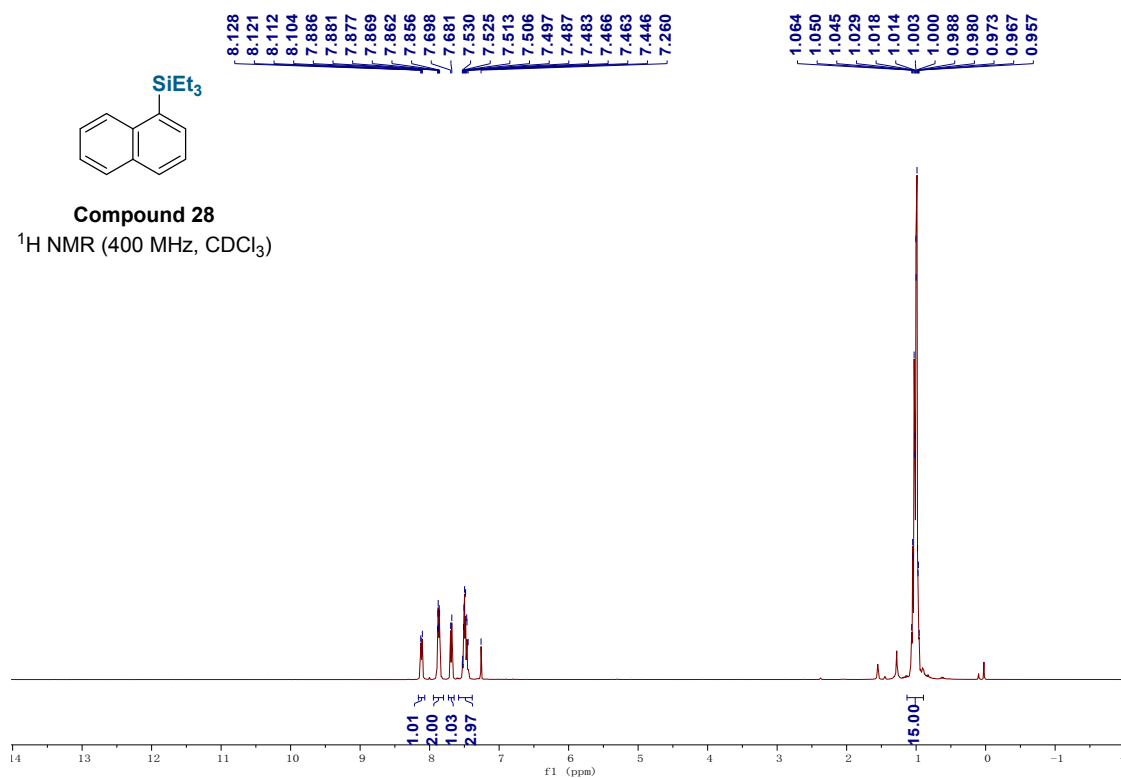

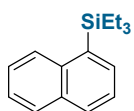

**Compound 28**  
 $^{13}\text{C}$  NMR (100 MHz,  $\text{CDCl}_3$ )

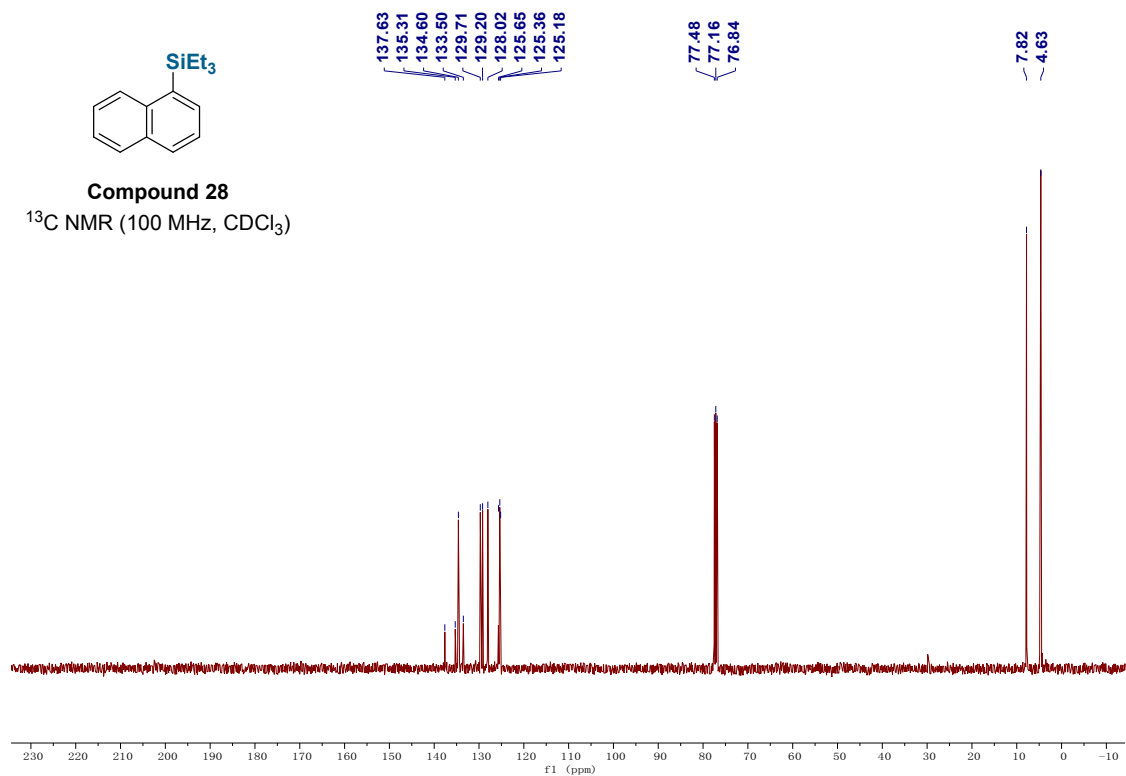

## 2-Methoxy-5-(triethylsilyl)pyridine (29)

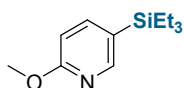

**Compound 29**  
 $^1\text{H}$  NMR (400 MHz,  $\text{CDCl}_3$ )

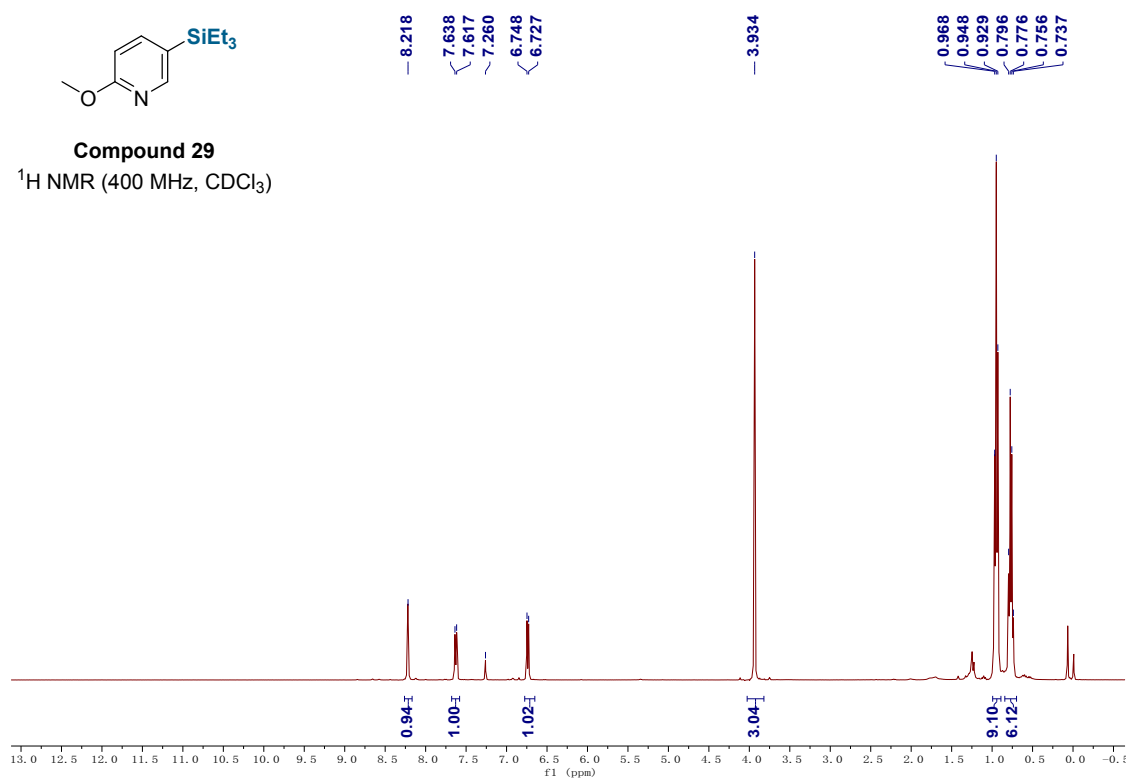

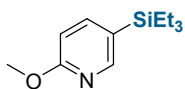

**Compound 29**  
 $^{13}\text{C}$  NMR (100 MHz,  $\text{CDCl}_3$ )

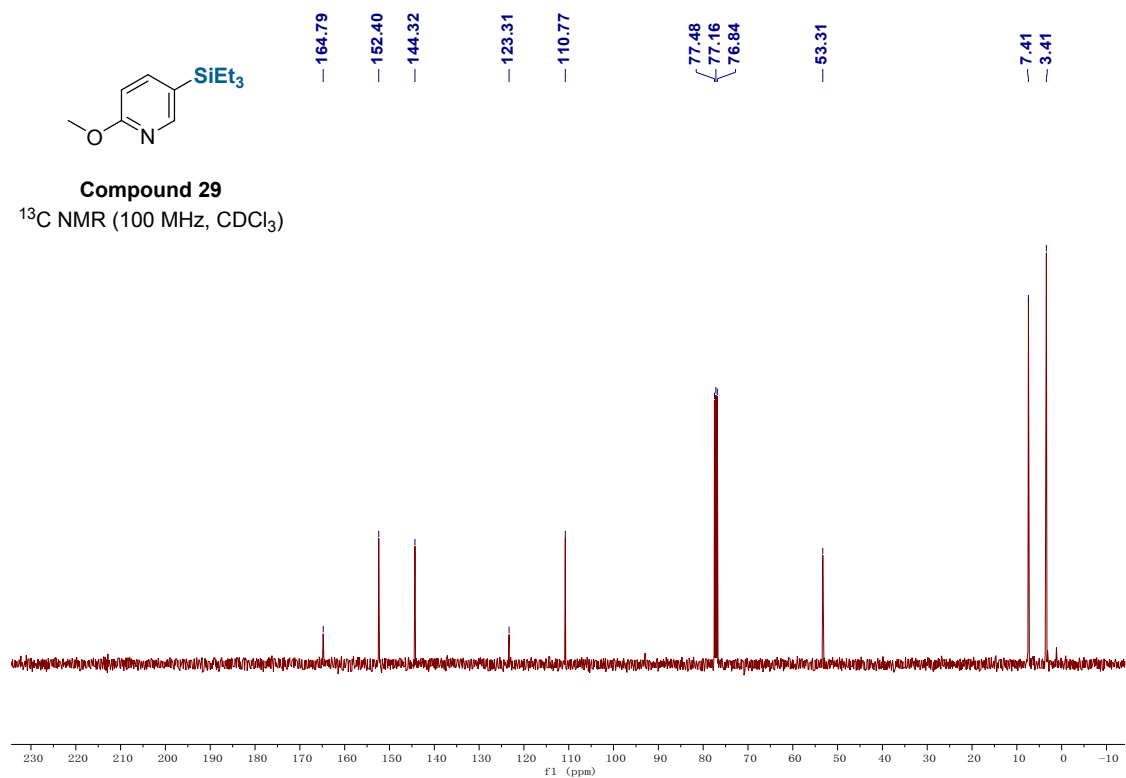

### 4-(Triethylsilyl)isoquinoline (30)

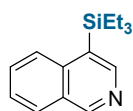

**Compound 30**  
 $^1\text{H}$  NMR (400 MHz,  $\text{CDCl}_3$ )

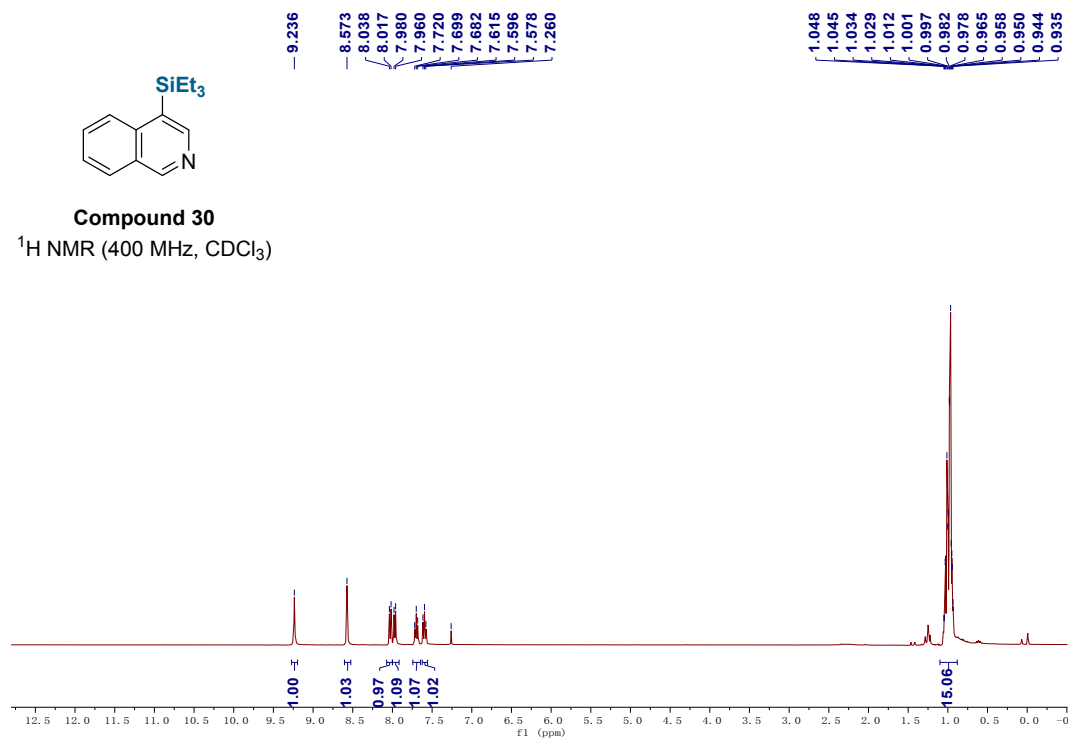

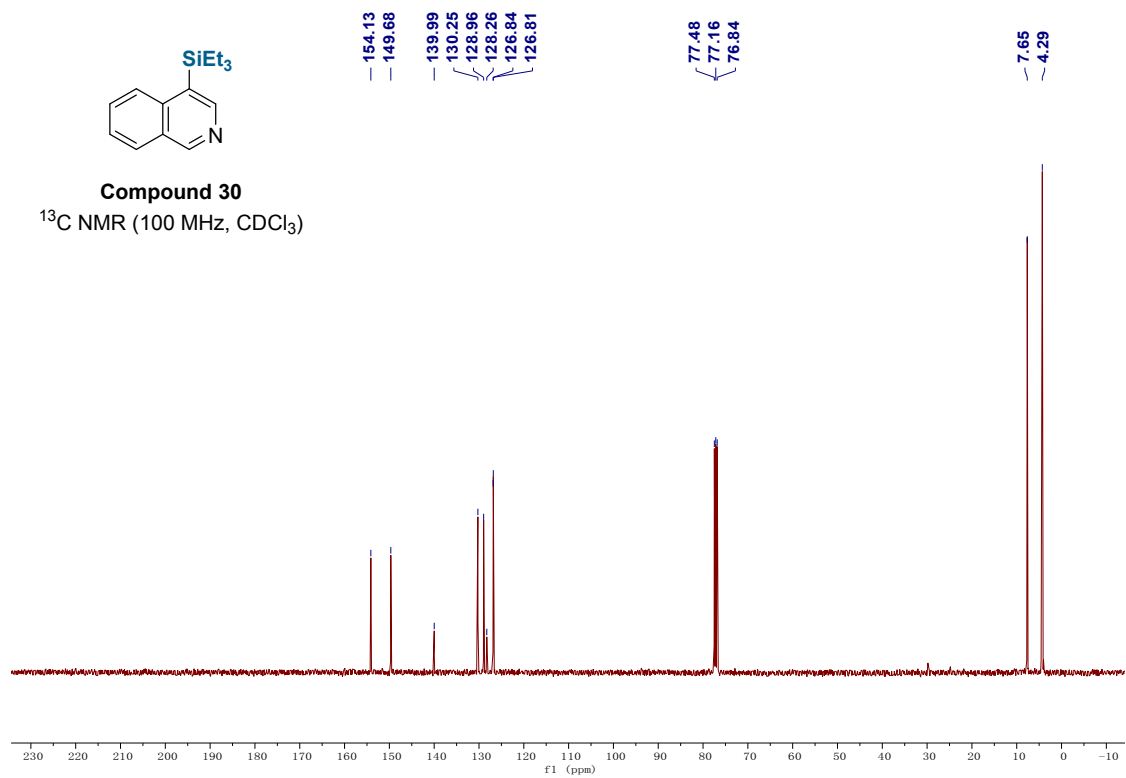

**2-([1,1'-Biphenyl]-4-yl)-4,4,5,5-tetramethyl-1,3,2-dioxaborolane (31)**

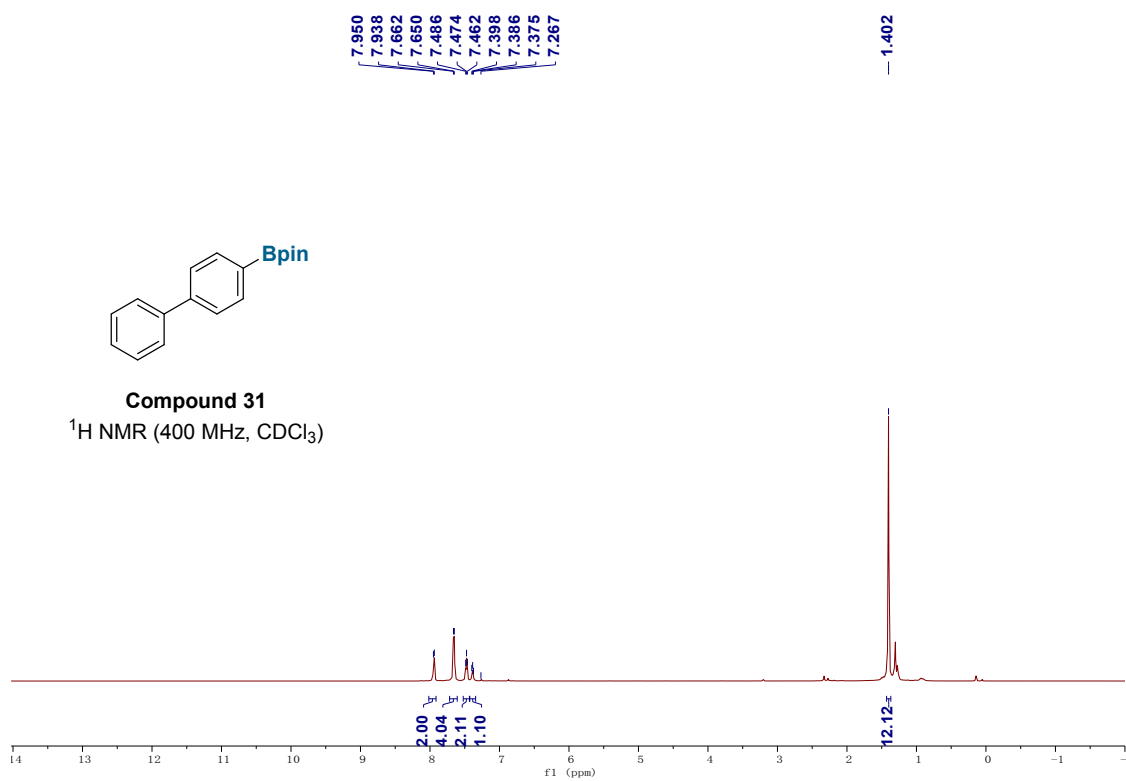

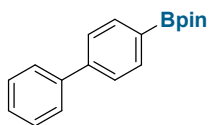

**Compound 31**  
 $^{13}\text{C}$  NMR (100 MHz,  $\text{CDCl}_3$ )

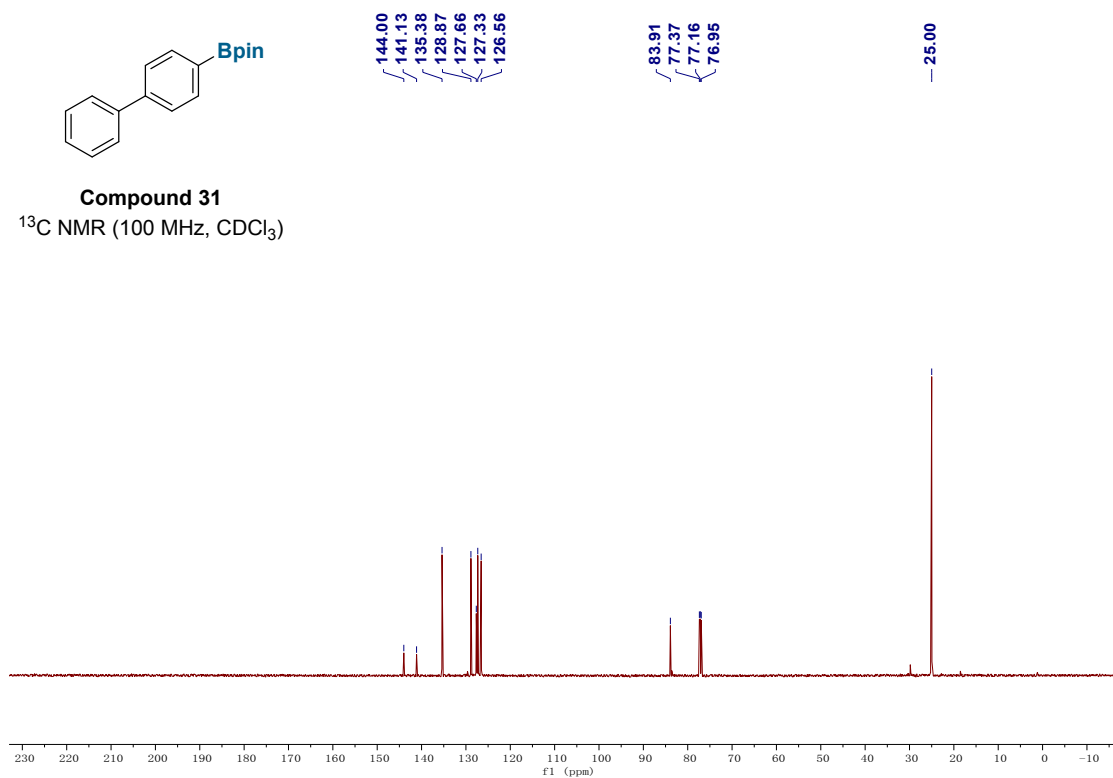

**4-Methyl-4'-(4,4,5,5-tetramethyl-1,3,2-dioxaborolan-2-yl)biphenyl (32)**

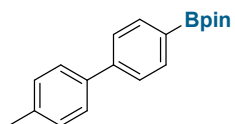

**Compound 32**  
 $^1\text{H}$  NMR (400 MHz,  $\text{CDCl}_3$ )

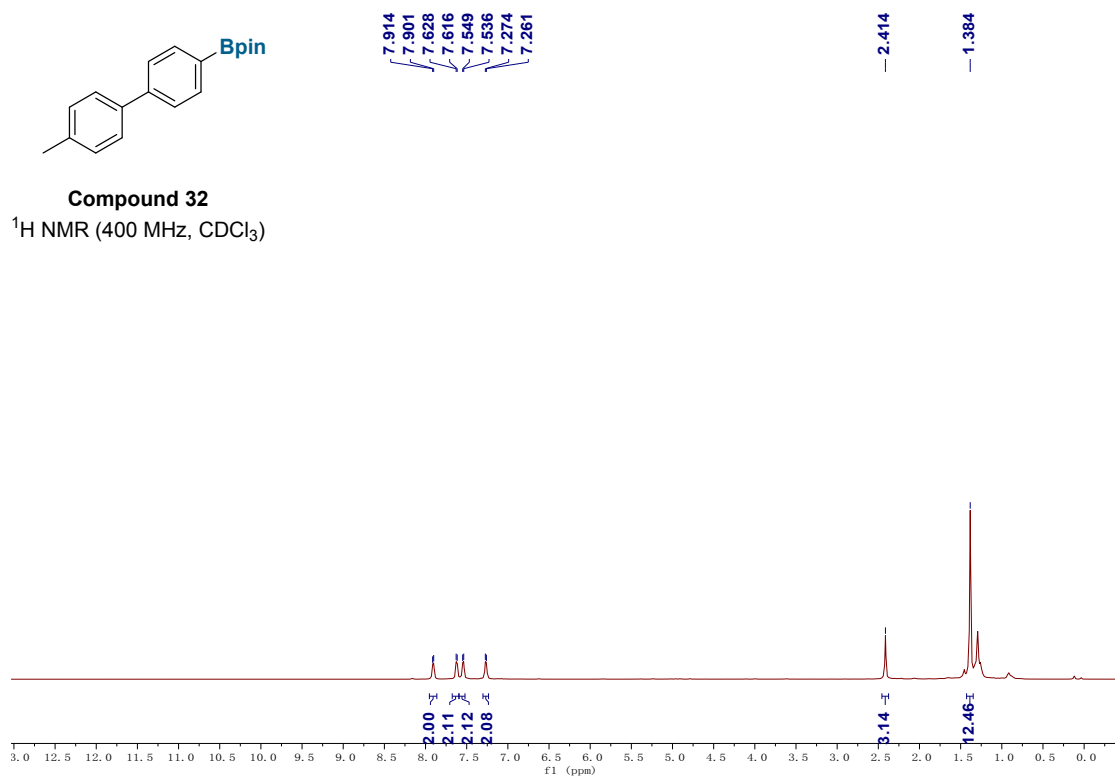

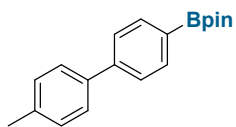

**Compound 32**

$^{13}\text{C}$  NMR (100 MHz,  $\text{CDCl}_3$ )

143.95  
138.24  
137.49  
135.37  
129.62  
127.17  
126.36

83.89  
77.37  
77.16  
76.95

24.99  
21.24

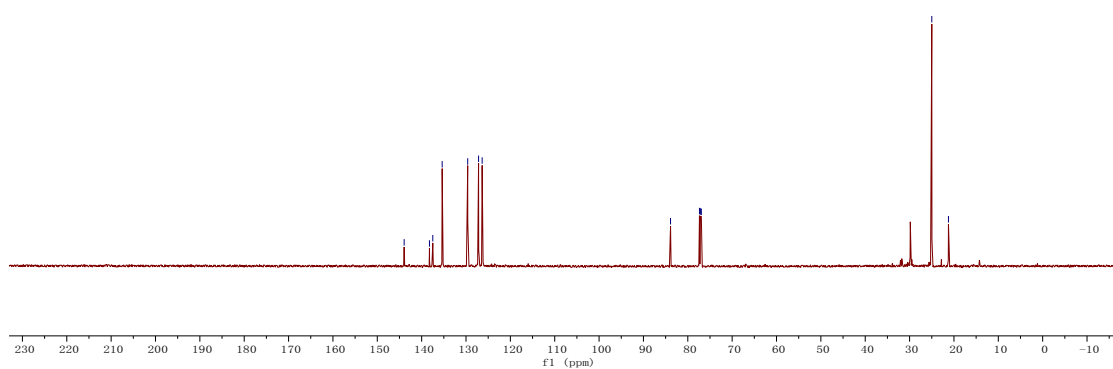

**2-(4'-(Tert-Butyl)-[1,1'-biphenyl]-4-yl)-4,4,5,5-tetramethyl-1,3,2-dioxaborolane**

**(33)**

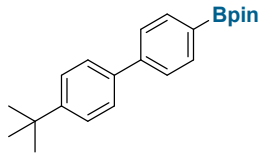

$^1\text{H NMR}$  (400 MHz,  $\text{CDCl}_3$ )

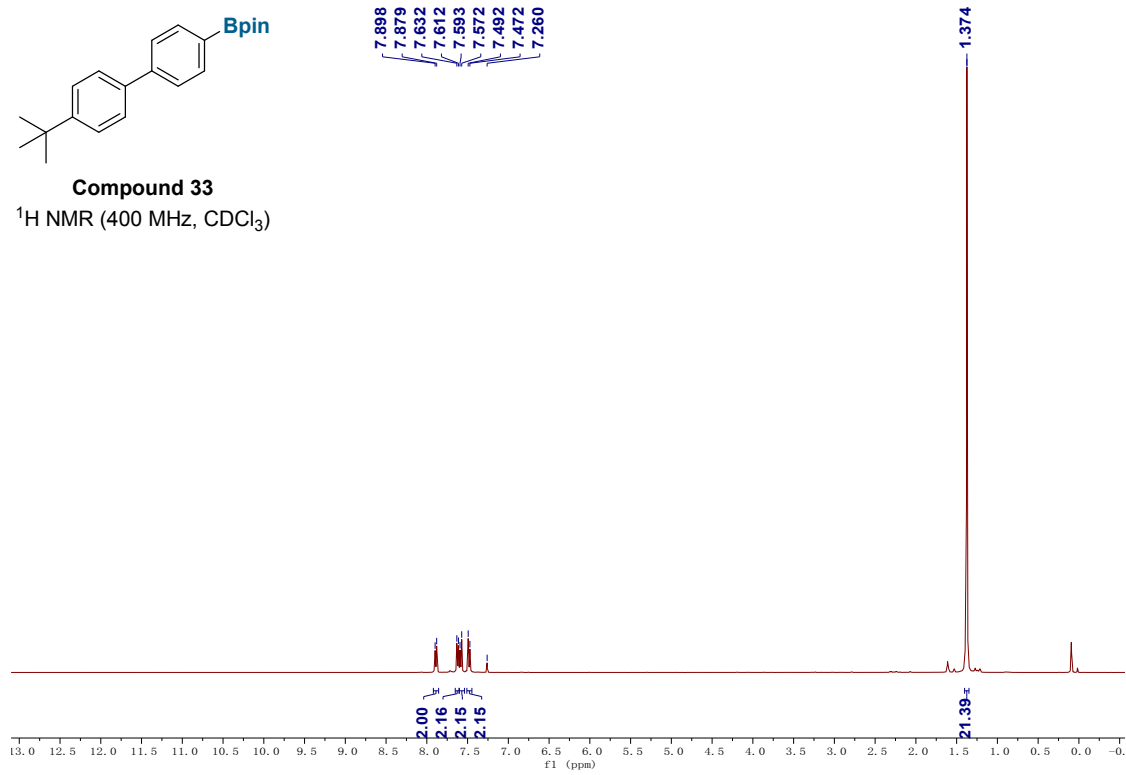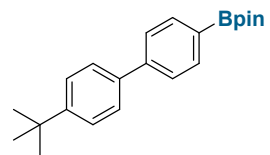

$^{13}\text{C NMR}$  (100 MHz,  $\text{CDCl}_3$ )

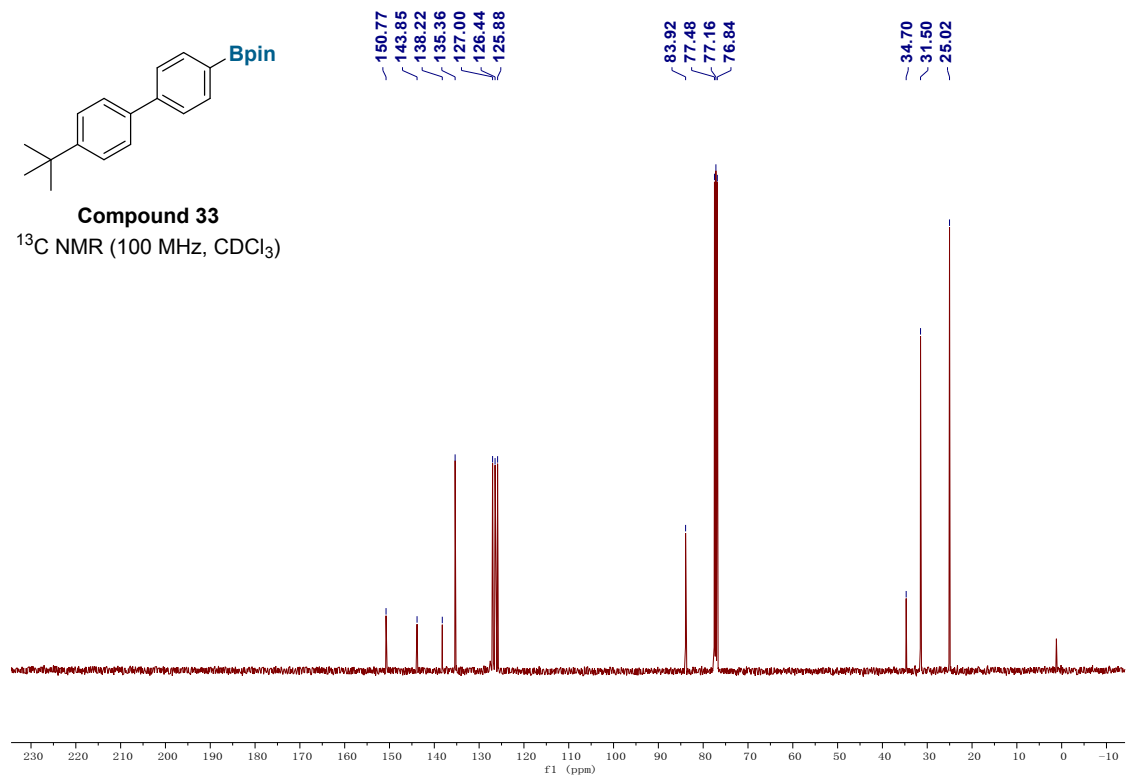

## 2-(4'-Methoxy-[1,1'-biphenyl]-4-yl)-4,4,5,5-tetramethyl-1,3,2-dioxaborolane (34)

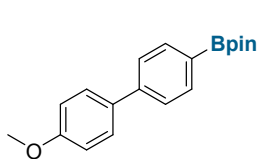

**Compound 34**

$^1\text{H}$  NMR (400 MHz,  $\text{CDCl}_3$ )

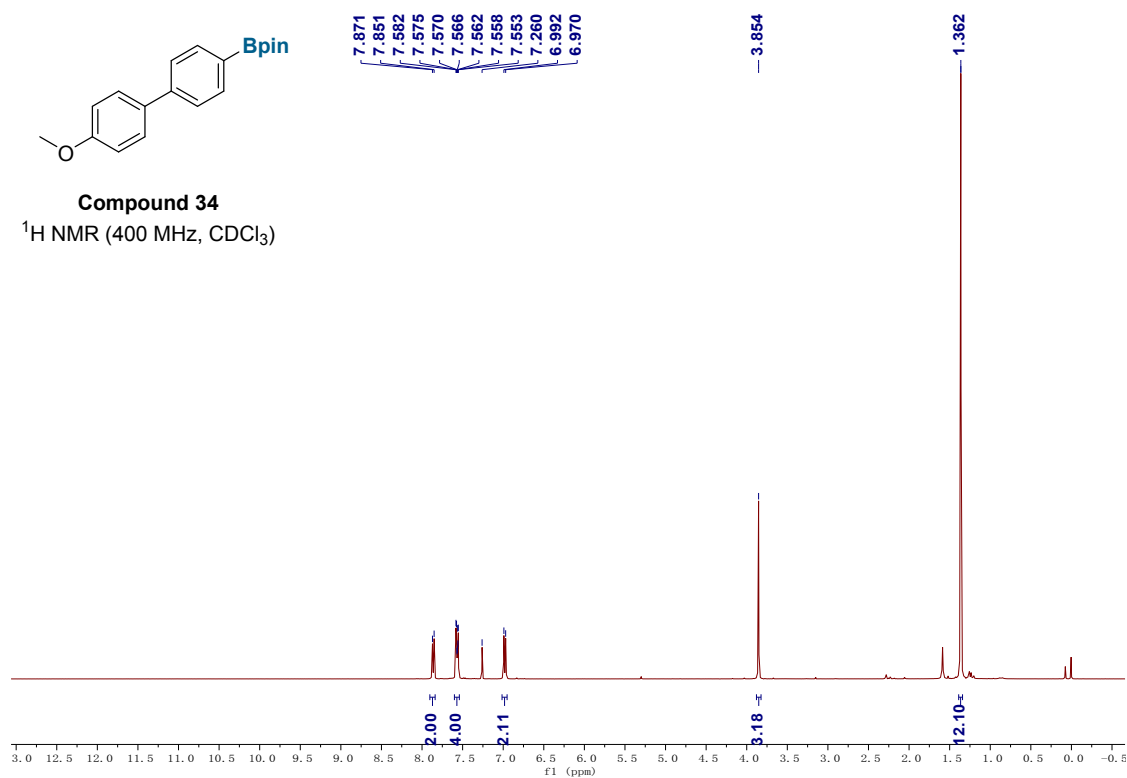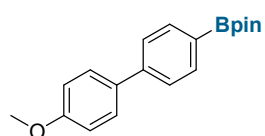

**Compound 34**

$^{13}\text{C}$  NMR (100 MHz,  $\text{CDCl}_3$ )

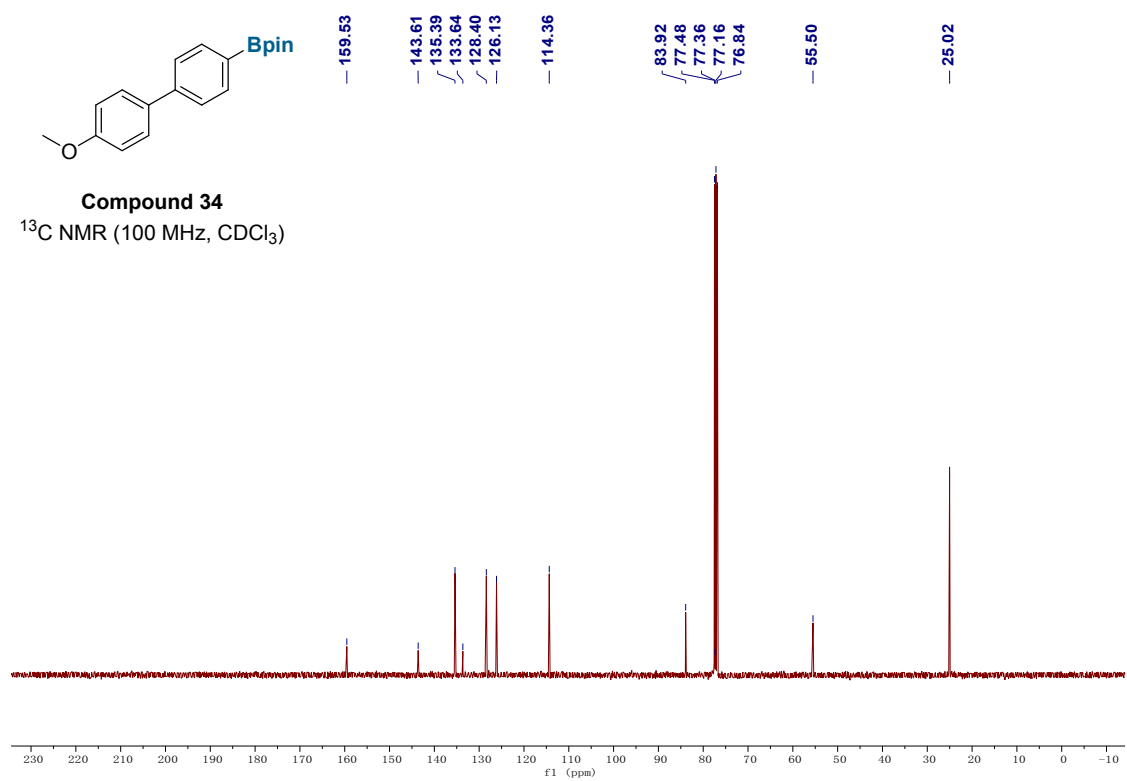



4-(4,4,5,5-Tetramethyl-1,3,2-dioxaborolan-2-yl)-2',4',6'-trimethylbiphenyl (35).

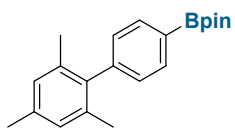

Compound 35

$^1\text{H}$  NMR (400 MHz,  $\text{CDCl}_3$ )

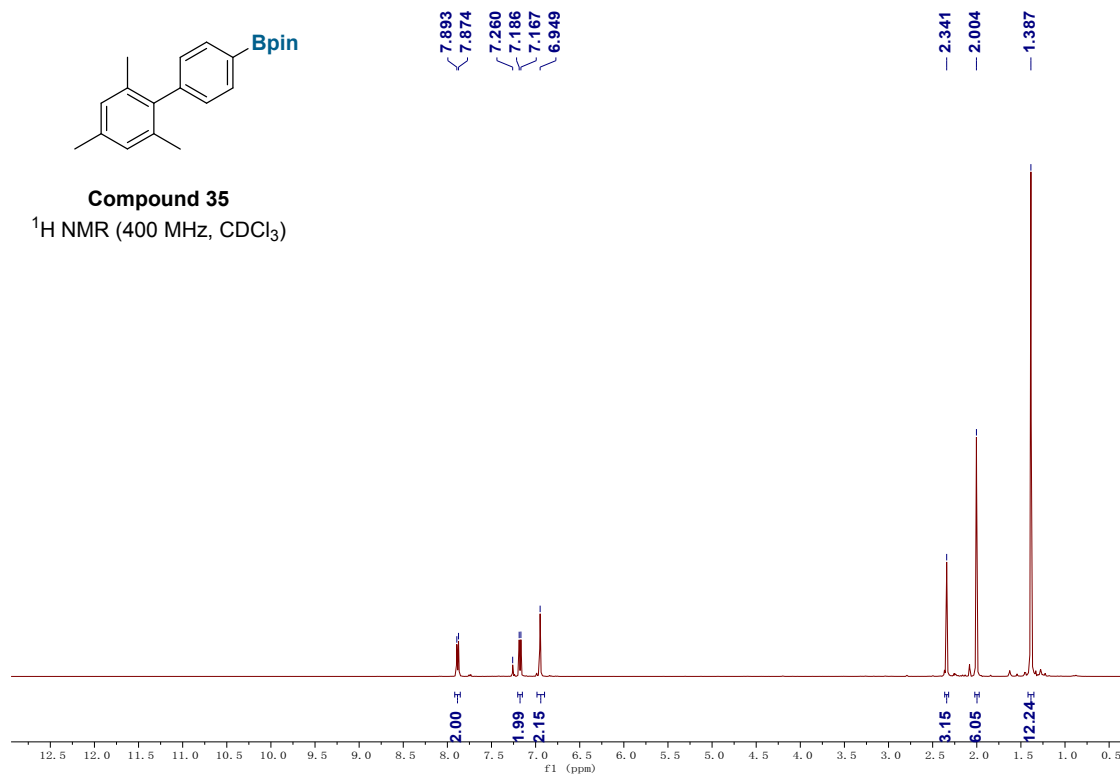

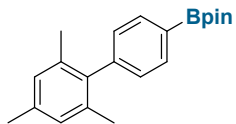

**Compound 35**  
 $^{13}\text{C}$  NMR (100 MHz,  $\text{CDCl}_3$ )

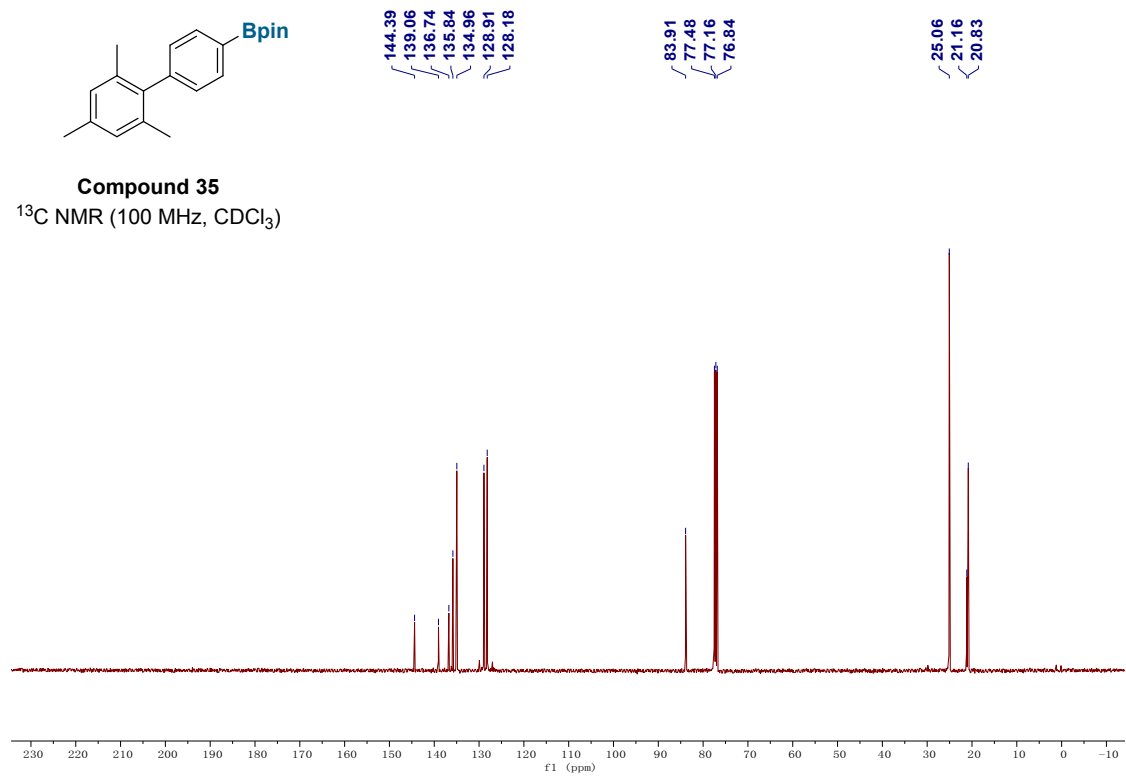

**4-Phenoxy-4'-(4,4,5,5-tetramethyl-1,3,2-dioxaborolan-2-yl)biphenyl (36)**

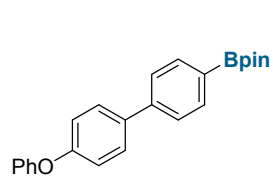

**Compound 36**  
 $^1\text{H}$  NMR (400 MHz,  $\text{CDCl}_3$ )

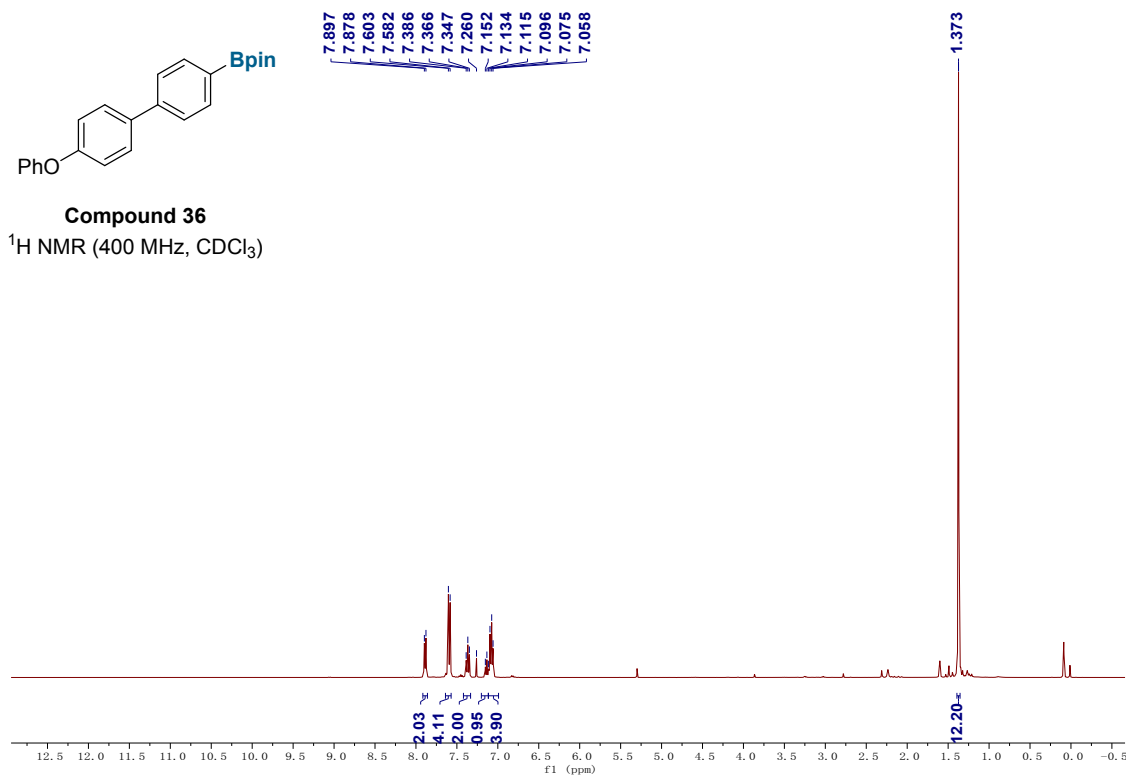

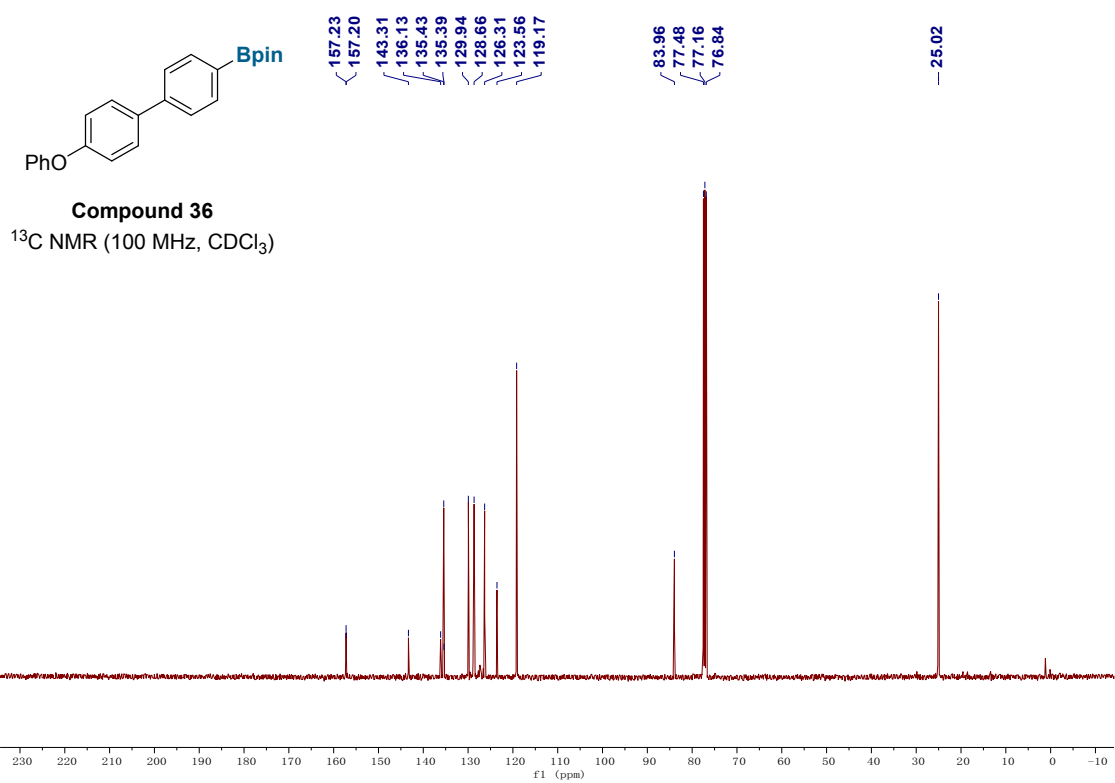

**3,4-Methylenedioxy-4'-(4,4,5,5-tetramethyl-1,3,2-dioxaborolan-2-yl)biphenyl (37)**

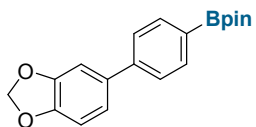

**Compound 37**

<sup>1</sup>H NMR (400 MHz, CDCl<sub>3</sub>)

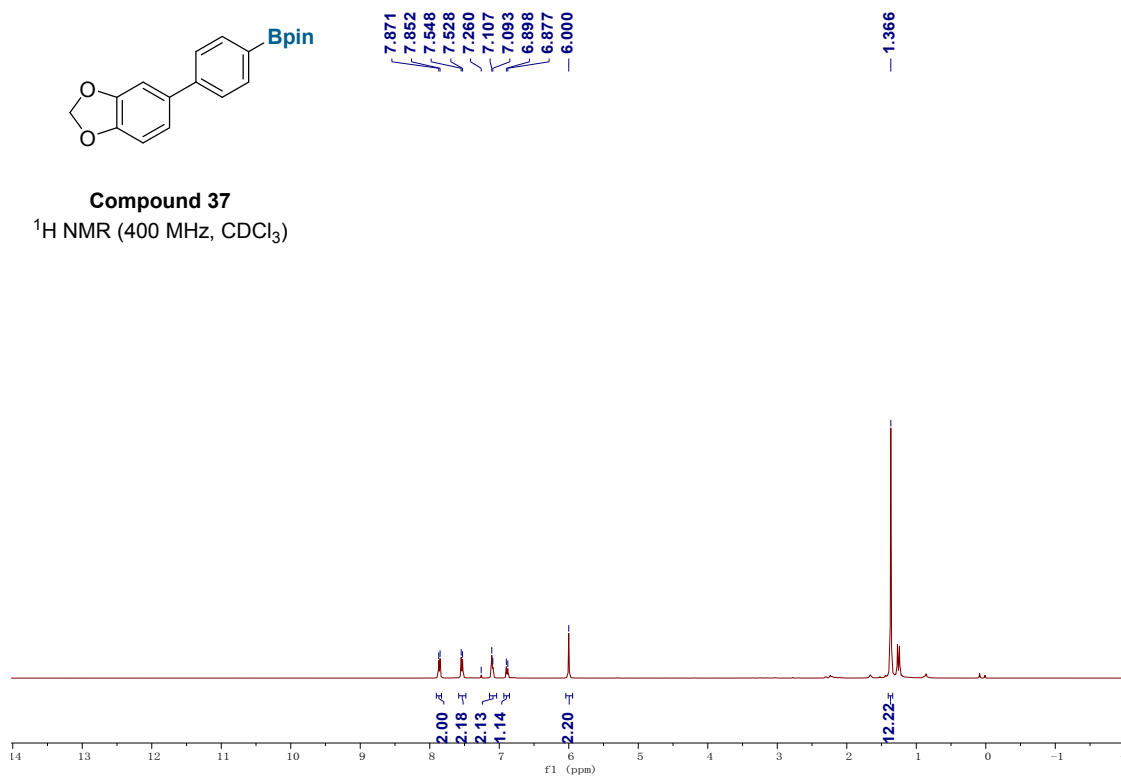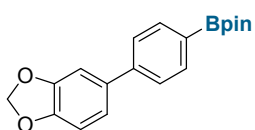

**Compound 37**

<sup>13</sup>C NMR (100 MHz, CDCl<sub>3</sub>)

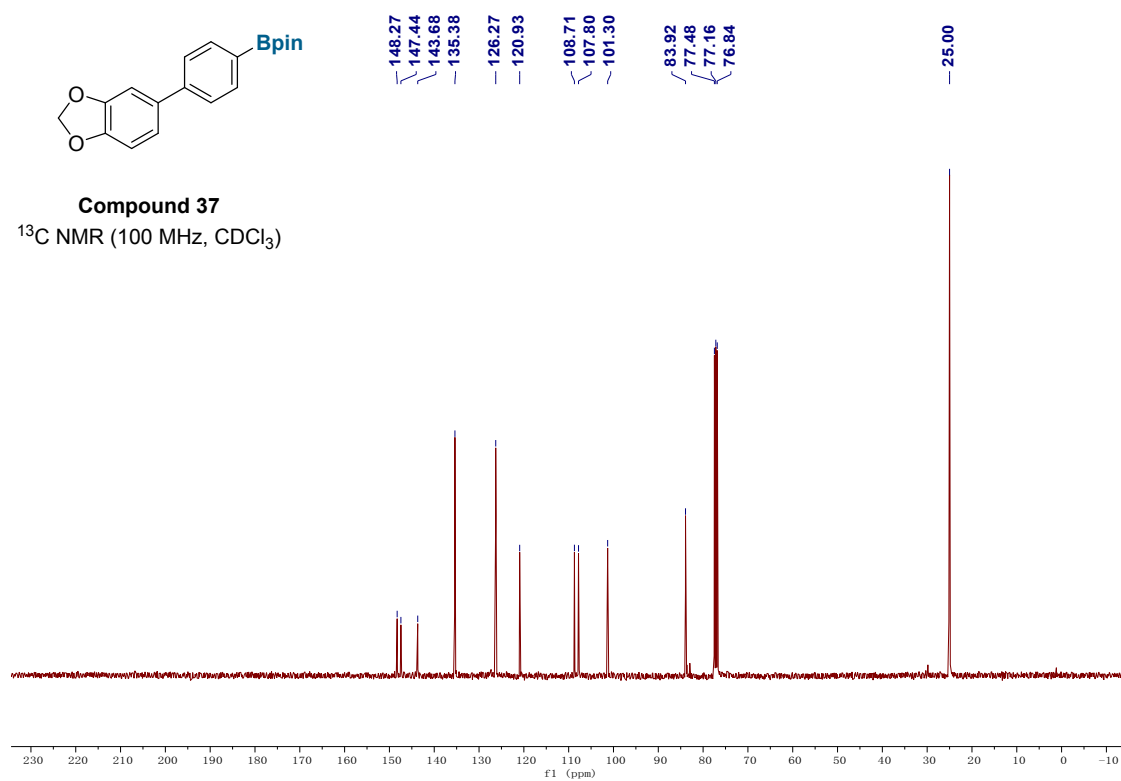

### 1-Isopropyl-3-(4-(4,4,5,5-tetramethyl-1,3,2-dioxaborolan-2-yl)phenyl)indole (38)

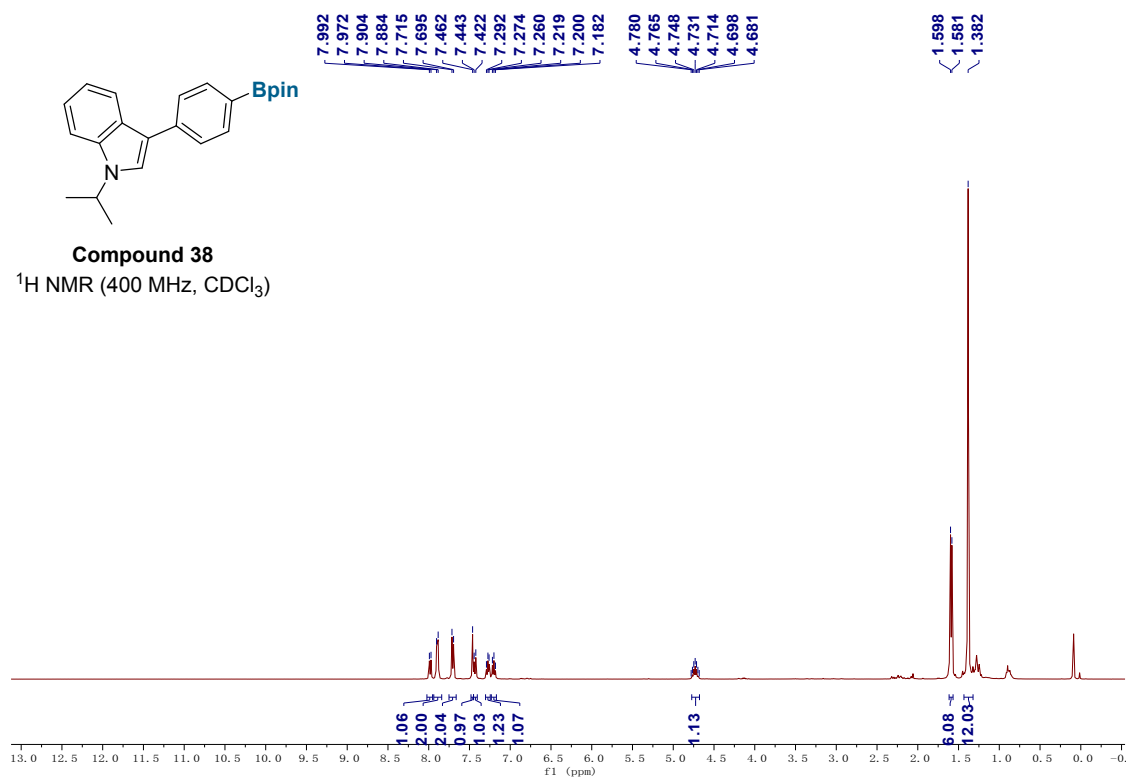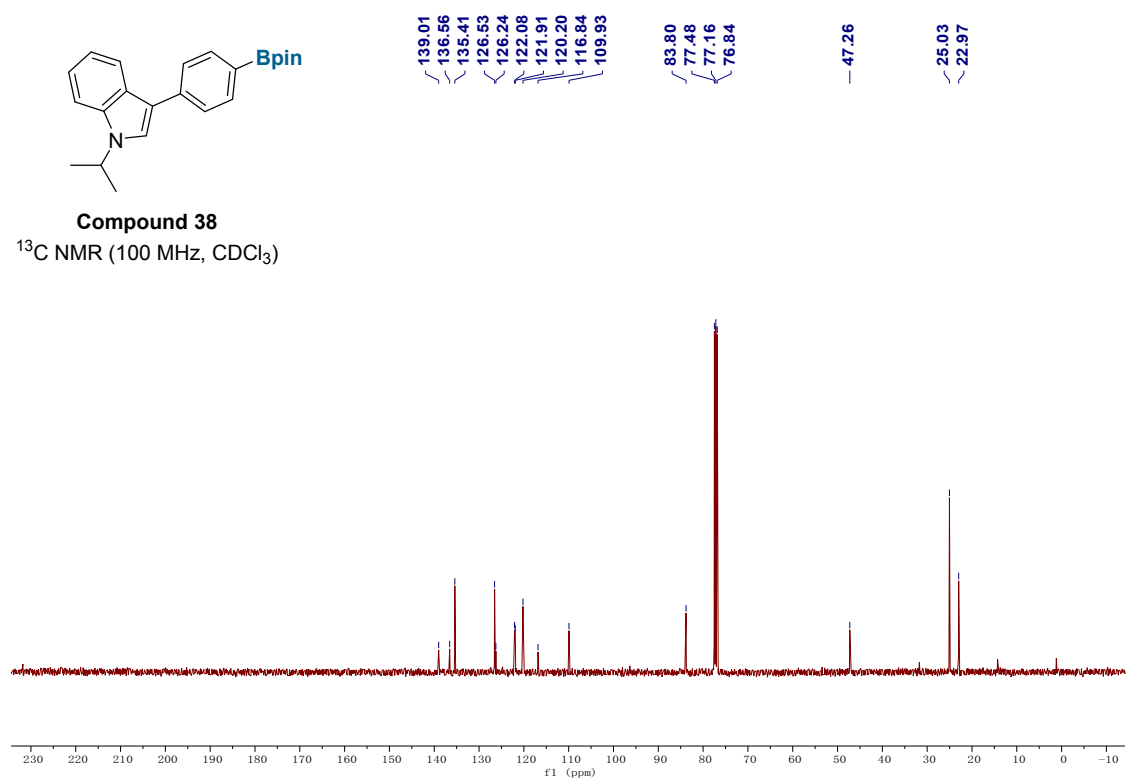

# N-(4-(4,4,5,5-Tetramethyl-1,3,2-dioxaborolan-2-yl)phenyl)pyrrole (39)

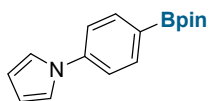

Compound 39

$^1\text{H}$  NMR (400 MHz,  $\text{CDCl}_3$ )

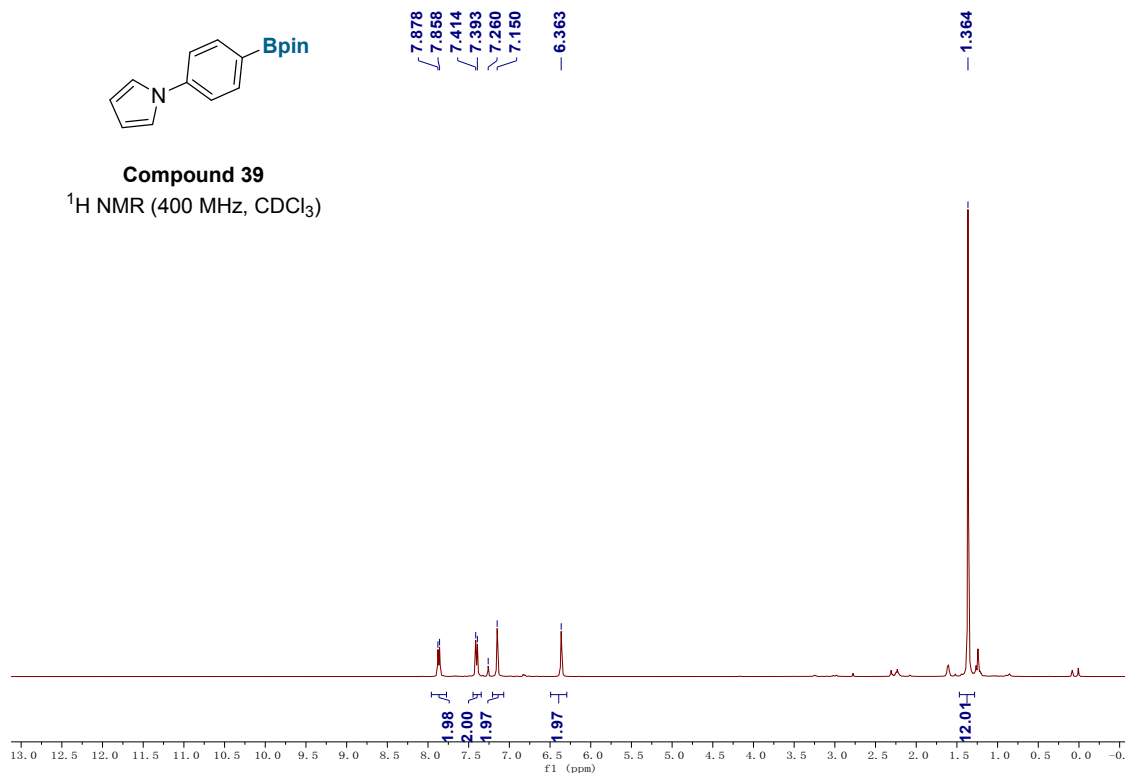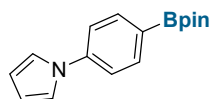

Compound 39

$^{13}\text{C}$  NMR (100 MHz,  $\text{CDCl}_3$ )

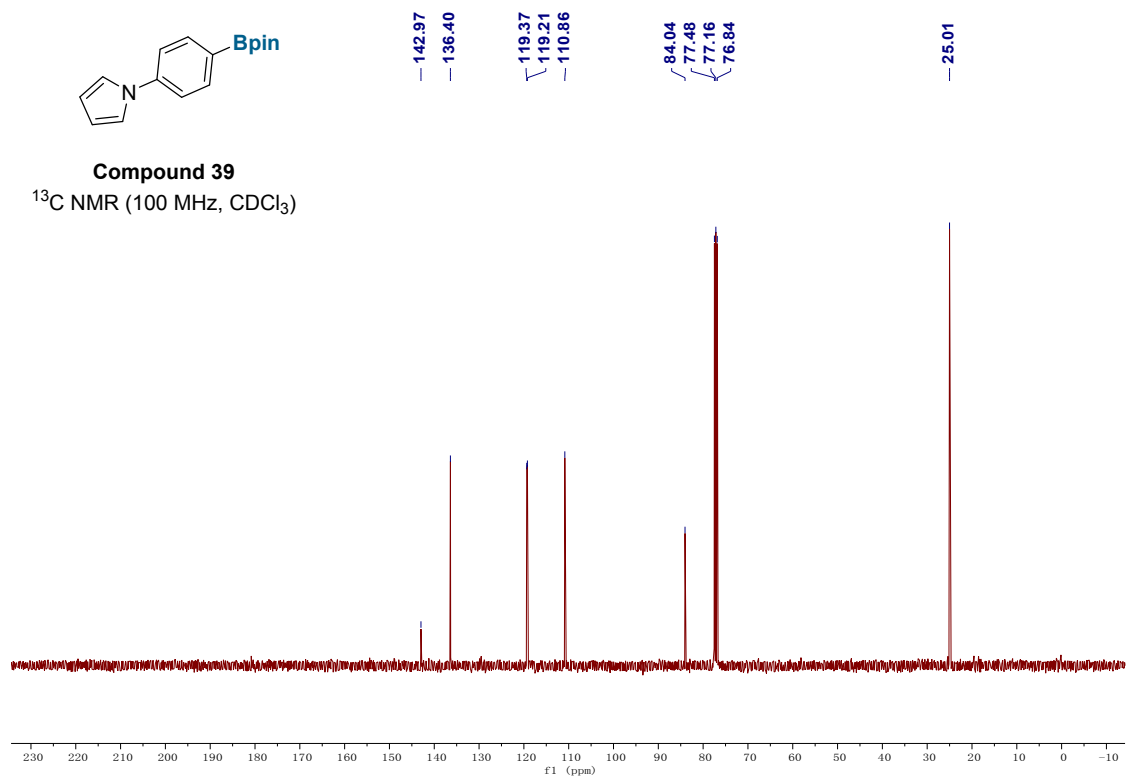

# 1-(4-(4,4,5,5-Tetramethyl-1,3,2-dioxaborolan-2-yl)phenyl)-1H-pyrazole (40)

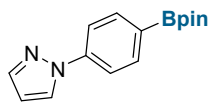

**Compound 40**  
<sup>1</sup>H NMR (400 MHz, CDCl<sub>3</sub>)

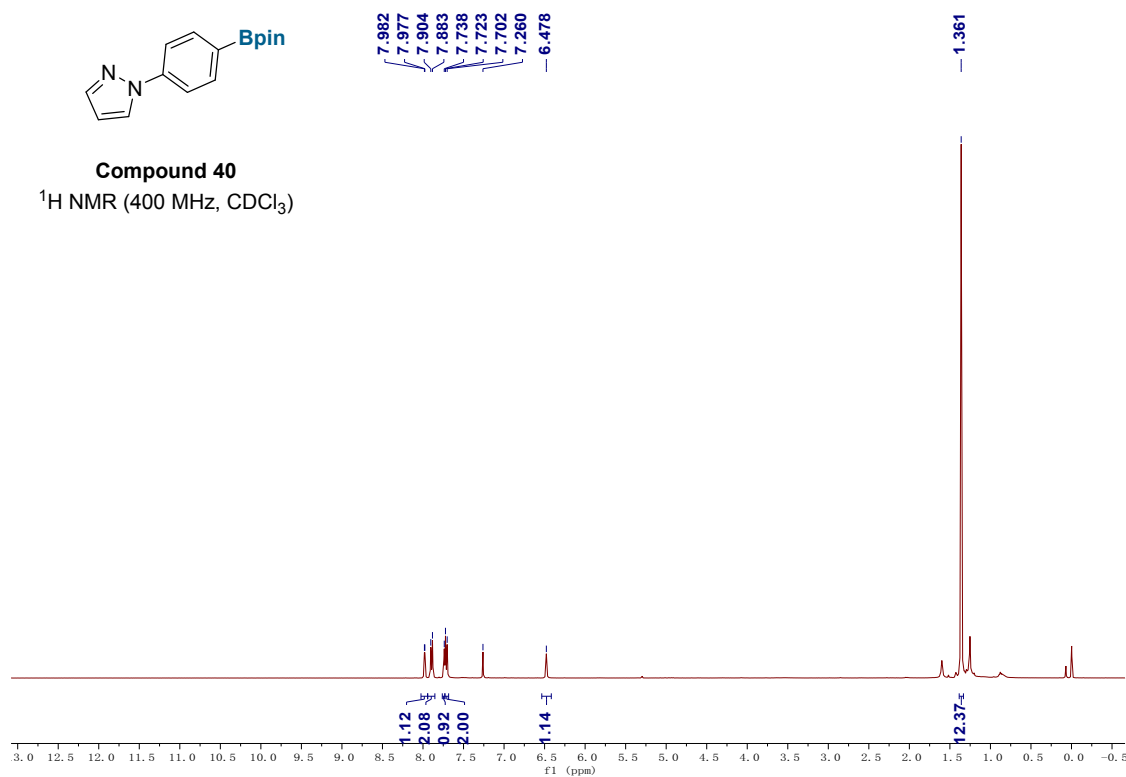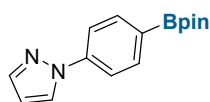

**Compound 40**  
<sup>13</sup>C NMR (100 MHz, CDCl<sub>3</sub>)

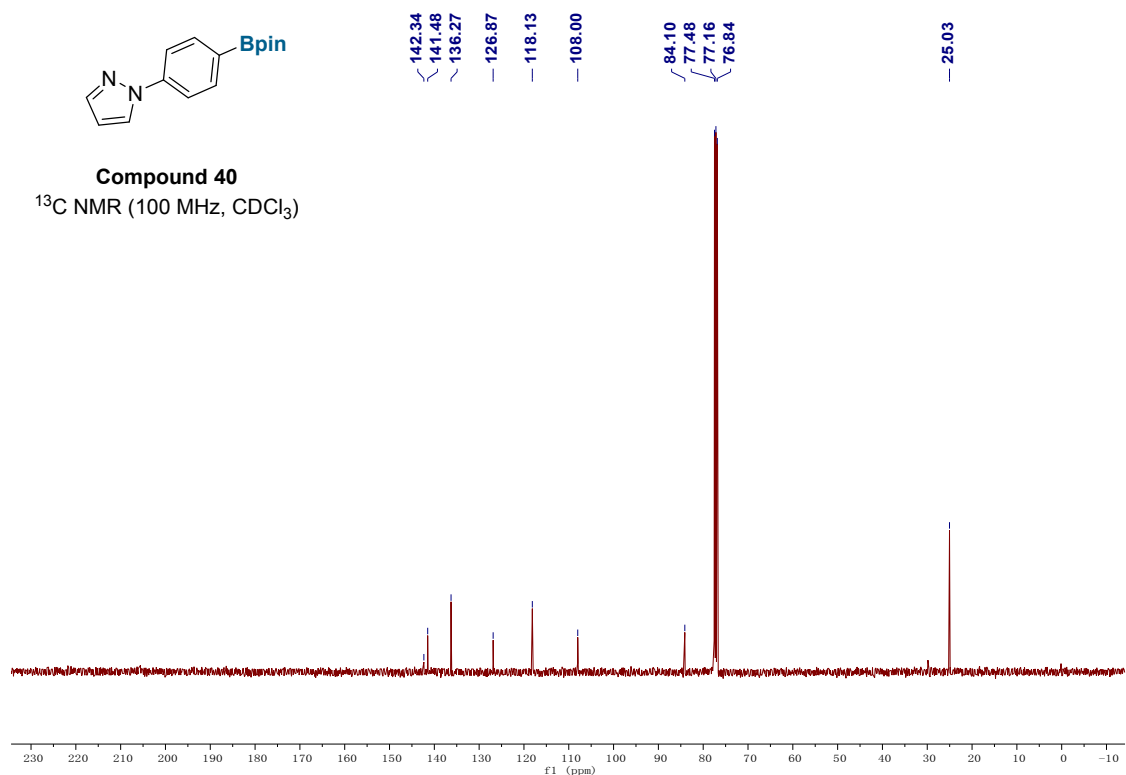

# 1-(4-(4,4,5,5-Tetramethyl-1,3,2-dioxaborolan-2-yl)phenyl)-1H-Indole (41)

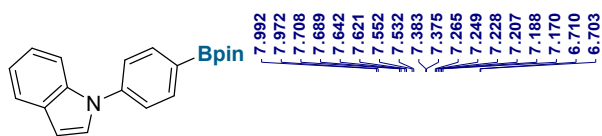

Compound 41

<sup>1</sup>H NMR (400 MHz, CDCl<sub>3</sub>)

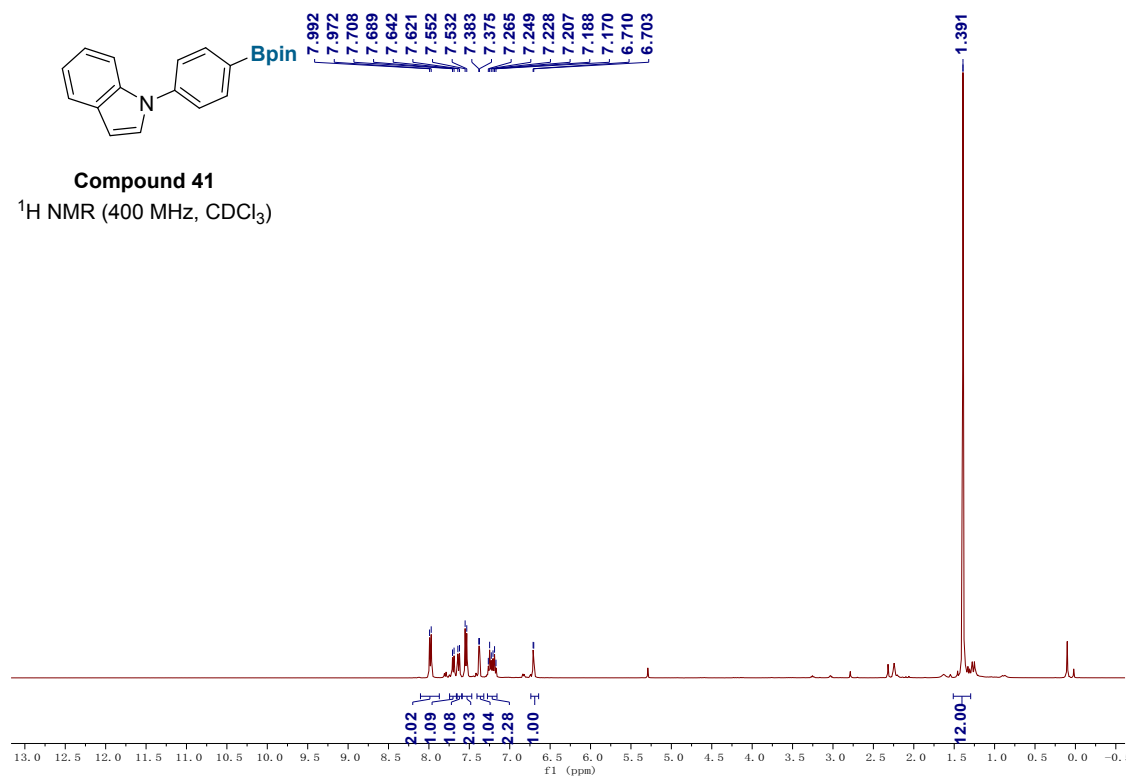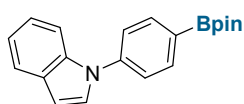

Compound 41

<sup>13</sup>C NMR (100 MHz, CDCl<sub>3</sub>)

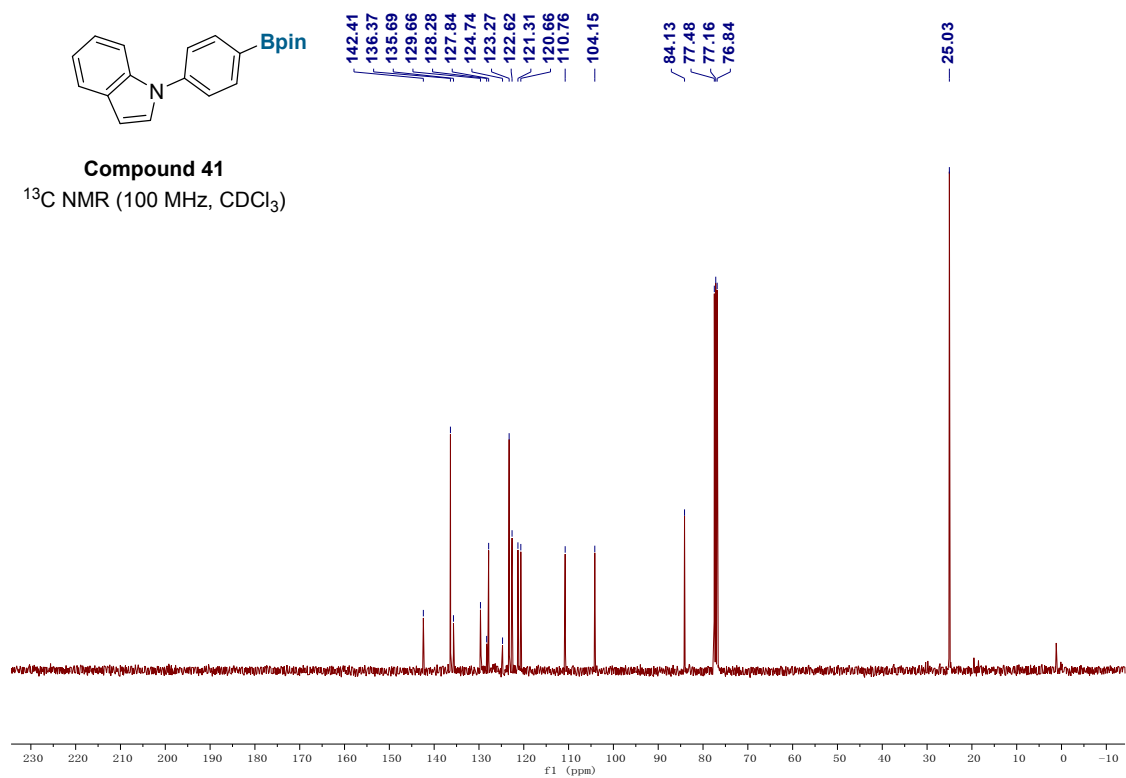



## 2-(4,4,5,5-Tetramethyl-1,3,2-dioxaborolan-2-yl)naphthalene (42)

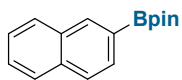

**Compound 42**

$^1\text{H}$  NMR (400 MHz,  $\text{CDCl}_3$ )

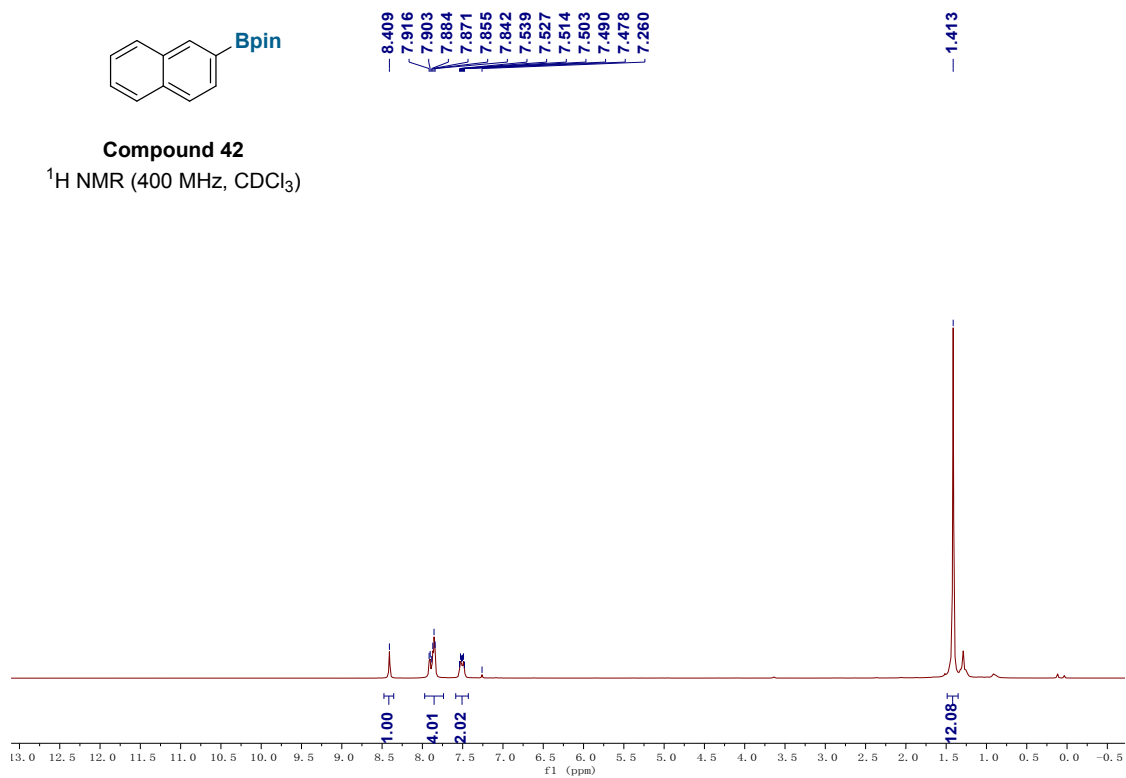

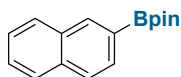

136.38  
135.17  
132.96  
130.54  
128.78  
127.84  
125.92

84.04  
77.37  
77.16  
76.95

— 25.05

**Compound 42**

$^{13}\text{C}$  NMR (100 MHz,  $\text{CDCl}_3$ )

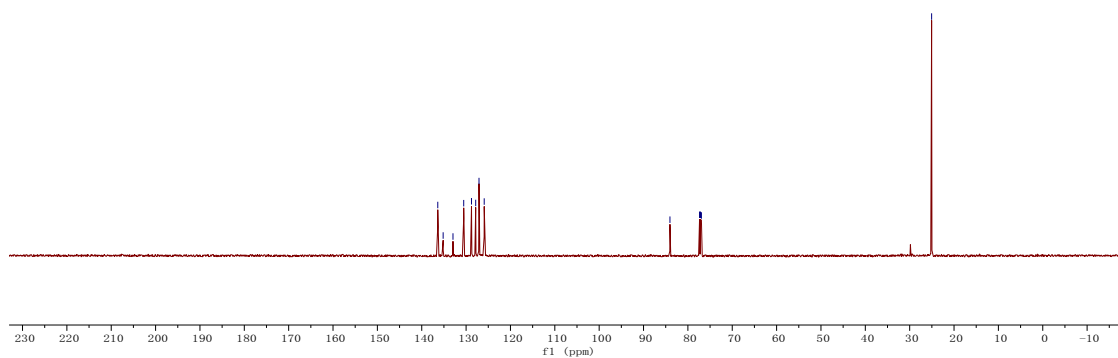

**1-(4,4,5,5-Tetramethyl-1,3,2-dioxaborolan-2-yl)naphthalene (43)**

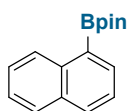

8.863  
8.849  
8.836  
8.171  
8.159  
8.148  
7.995  
7.988  
7.981  
7.974  
7.895  
7.888  
7.881  
7.874  
7.603  
7.591  
7.580  
7.545  
7.533  
7.522  
7.512  
7.260

— 1.475

**Compound 43**

$^1\text{H}$  NMR (400 MHz,  $\text{CDCl}_3$ )

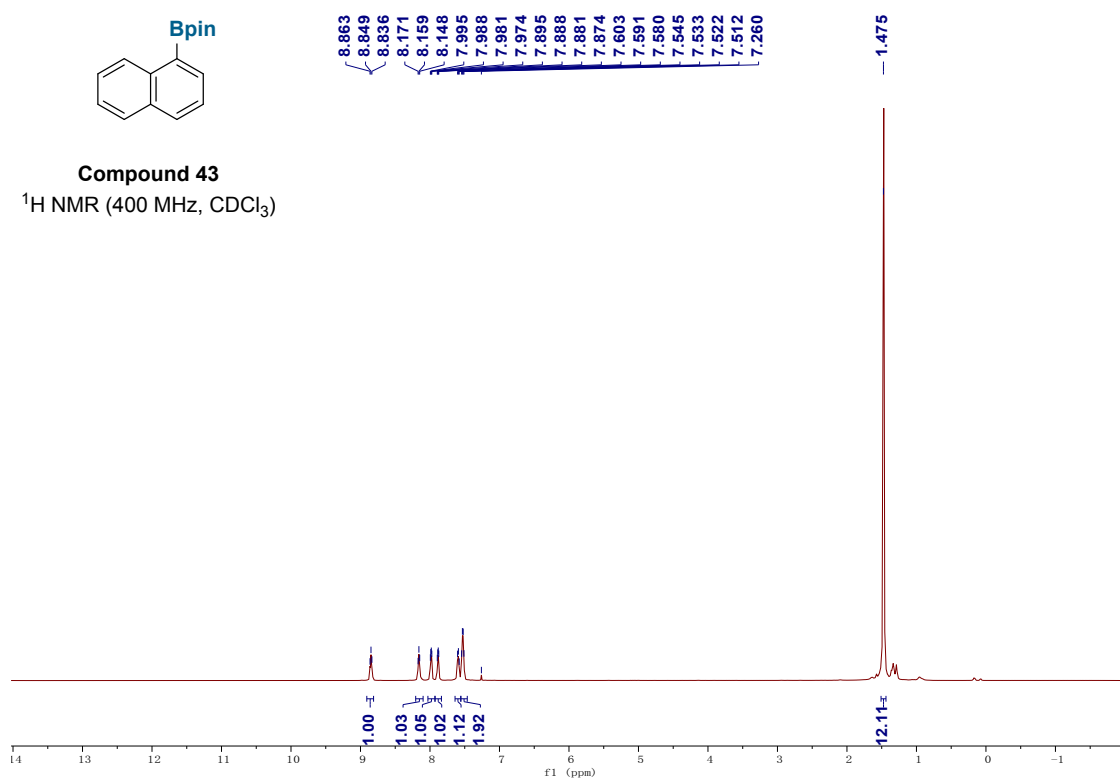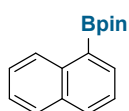

**Compound 43**

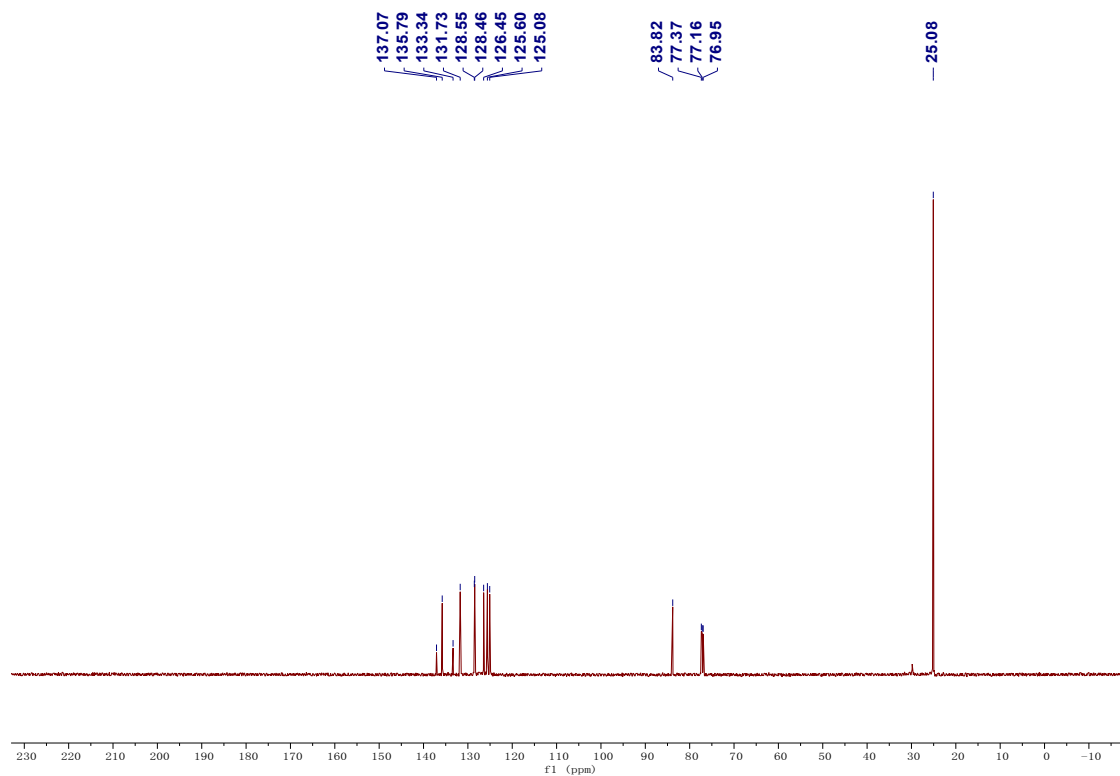

### 1-[4-(4,4,5,5-Tetramethyl-1,3,2-dioxaborolan-2-yl)-1-naphthalenyl]ethanone (44)

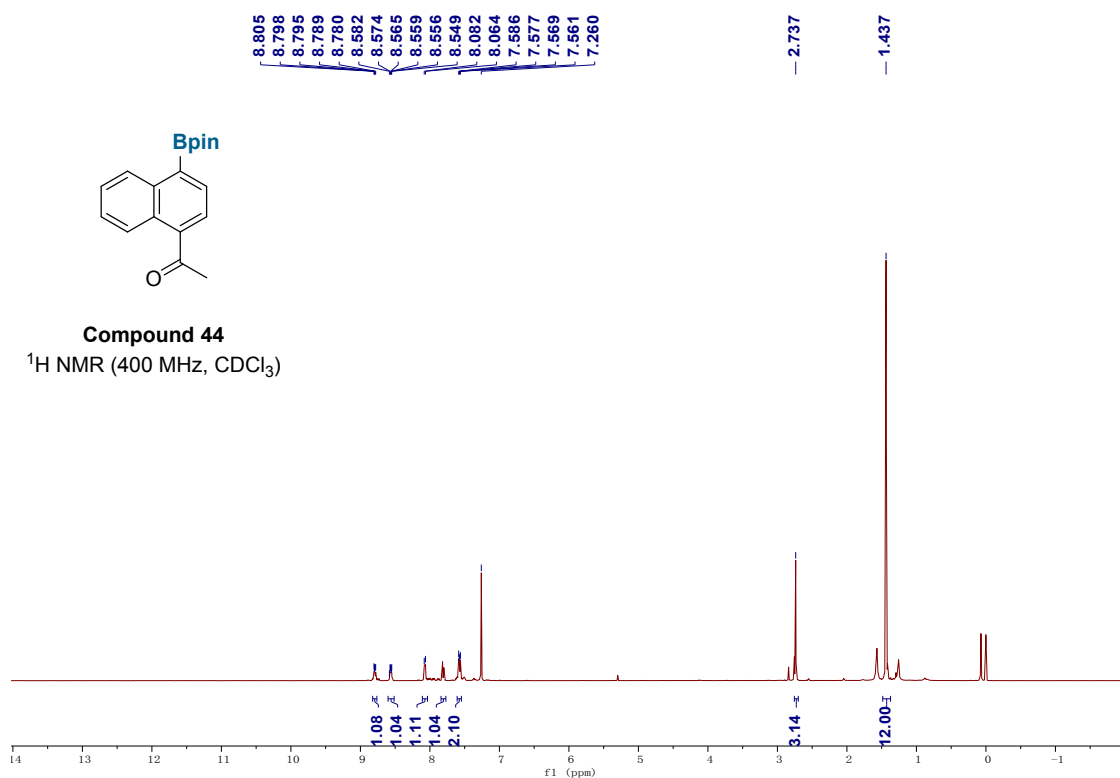

# 4,4,5,5-Tetramethyl-2-(4-phenoxyphenyl)-1,3,2-dioxaborolane (45)

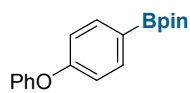

**Compound 45**  
 $^1\text{H NMR}$  (400 MHz,  $\text{CDCl}_3$ )

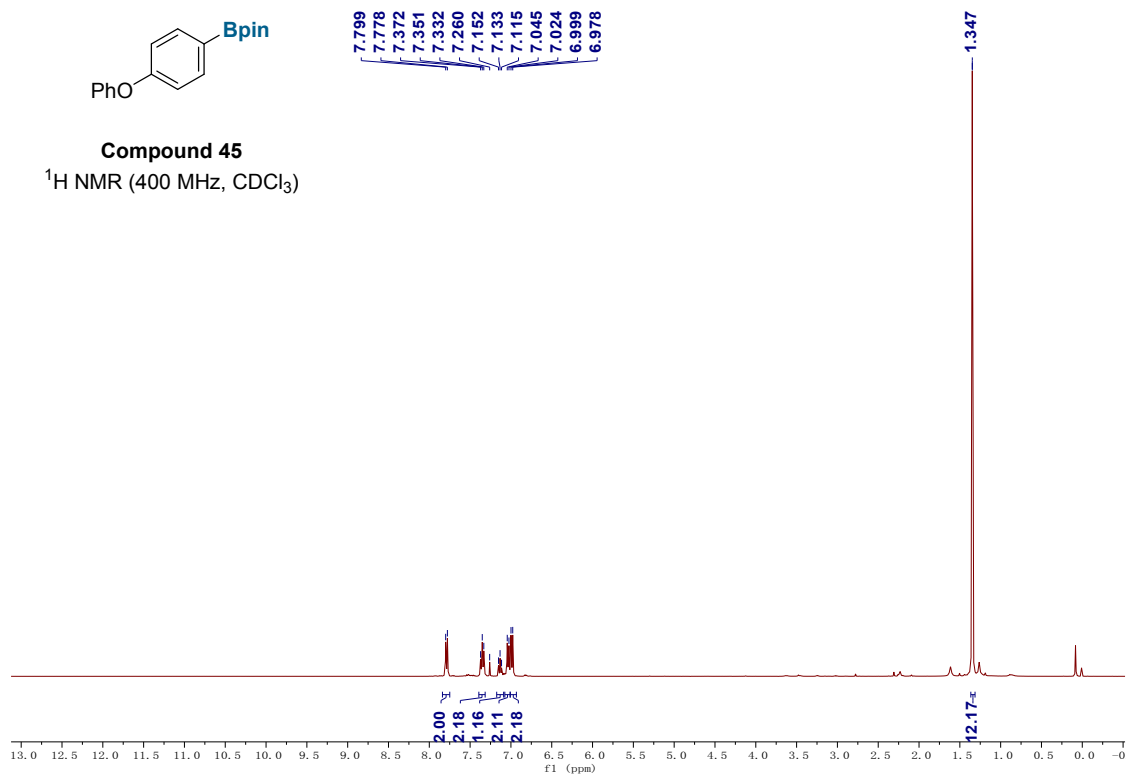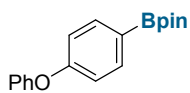

**Compound 45**  
 $^{13}\text{C NMR}$  (100 MHz,  $\text{CDCl}_3$ )

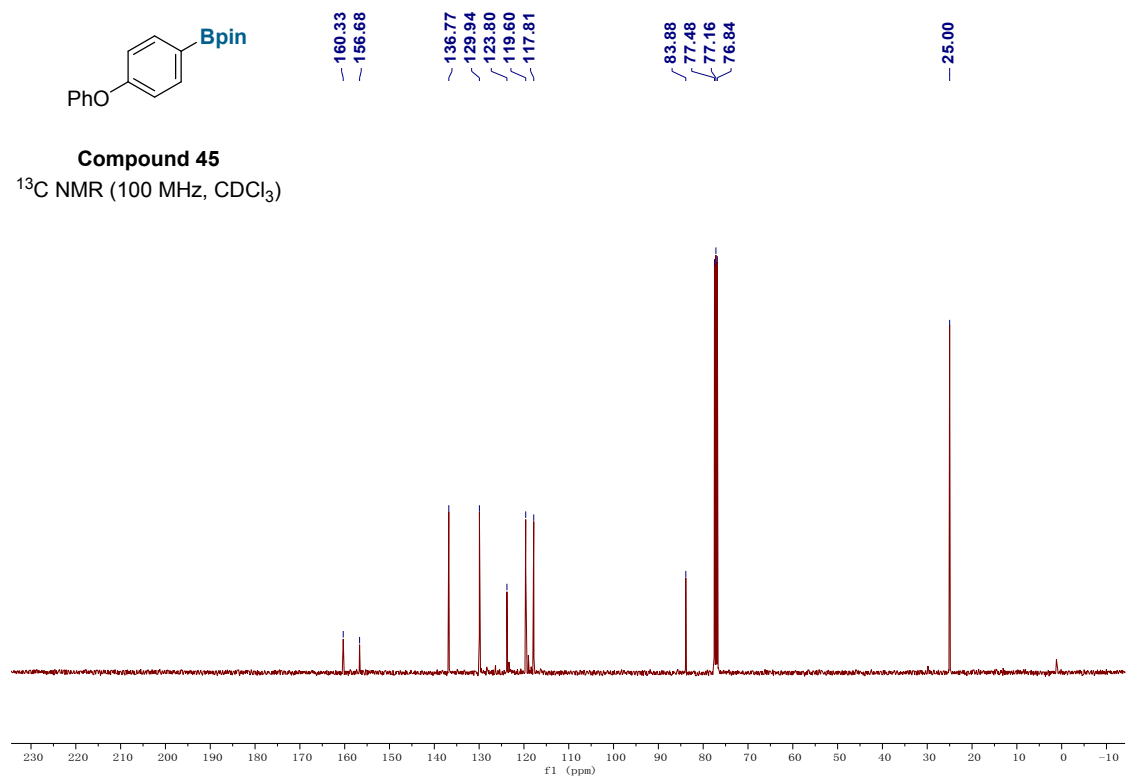

# 2-(4-(benzyloxy)phenyl)-4,4,5,5-tetramethyl-1,3,2-dioxaborolane (46)

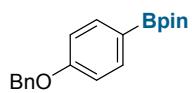

**Compound 46**

$^1\text{H}$  NMR (400 MHz,  $\text{CDCl}_3$ )

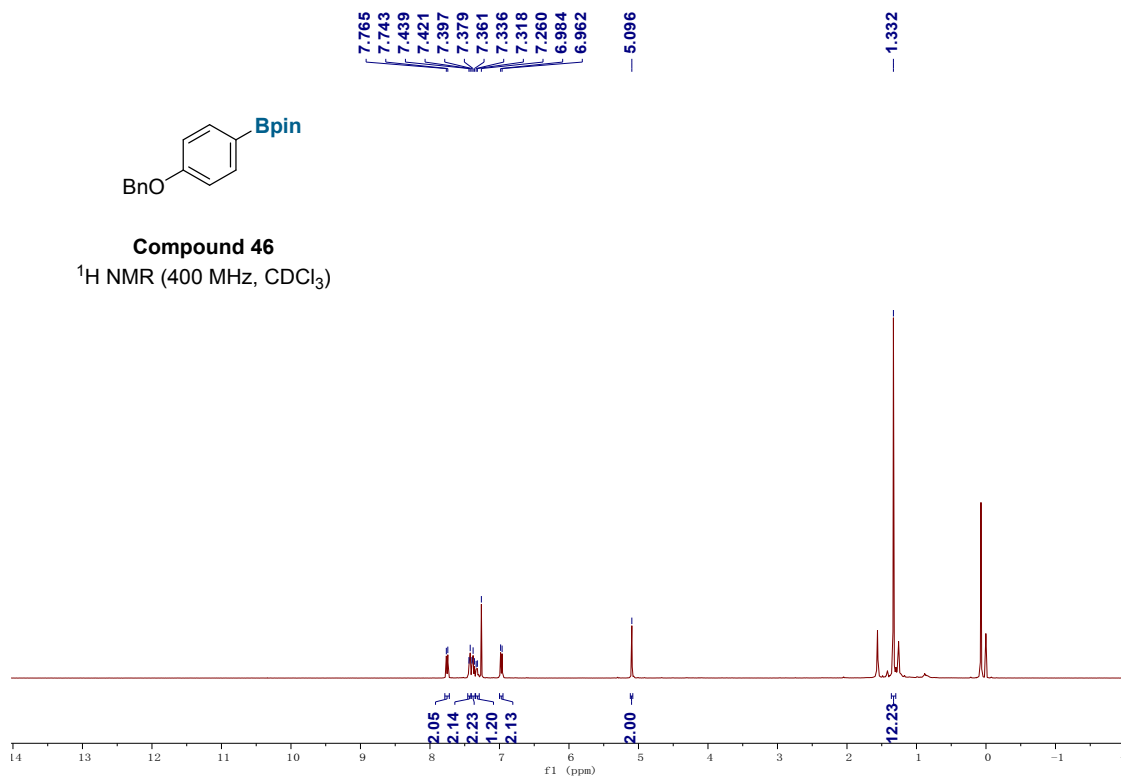

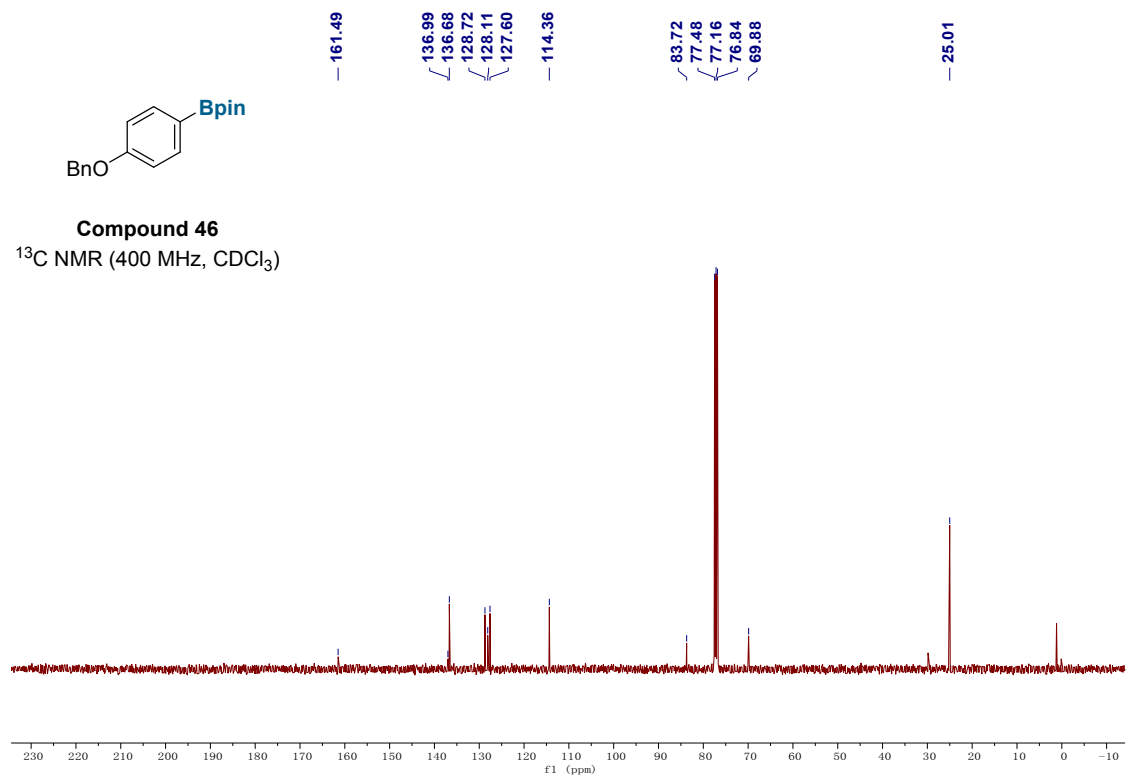

**2-(3,4-Dimethoxyphenyl)-4,4,5,5-tetramethyl-1,3,2-dioxaborolane (47)**

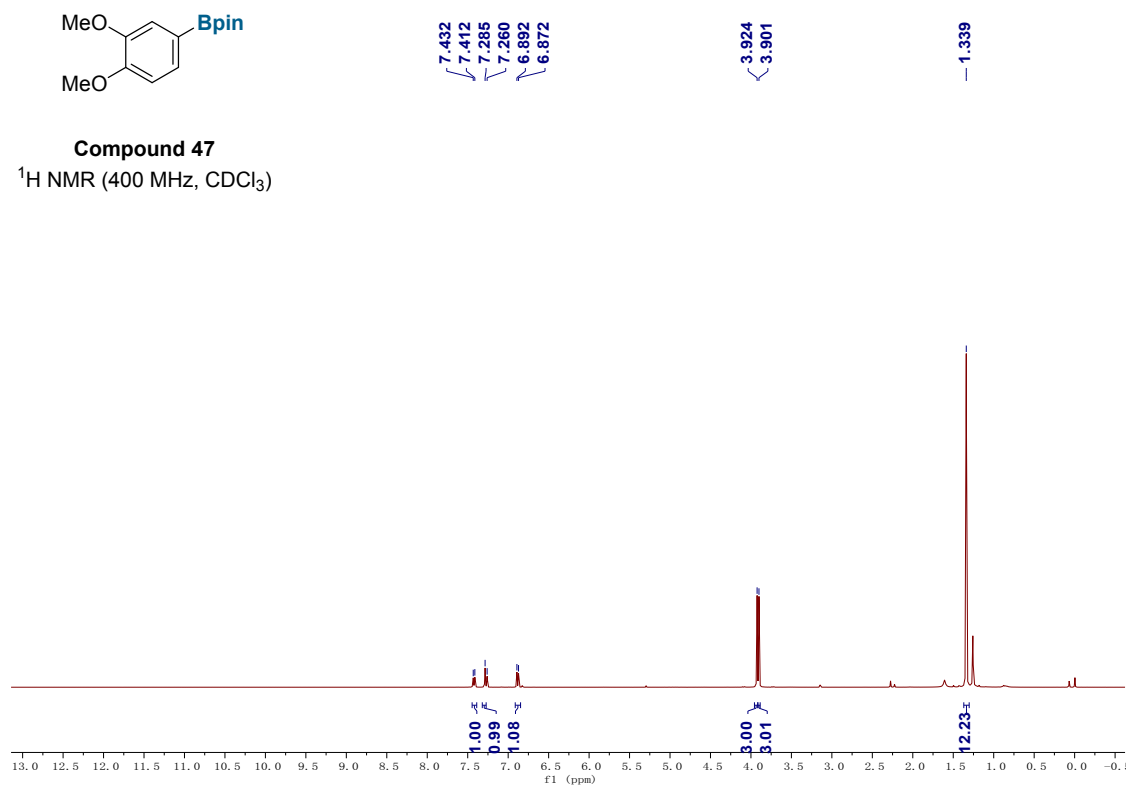

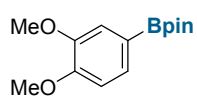

<sup>13</sup>C NMR (100 MHz, CDCl<sub>3</sub>) chemical shifts (ppm):  
151.78, 148.49, 128.70, 116.70, 110.63, 83.80, 77.48, 77.16, 76.84, 55.99, 55.88, 24.99

**Compound 47**  
<sup>13</sup>C NMR (100 MHz, CDCl<sub>3</sub>)

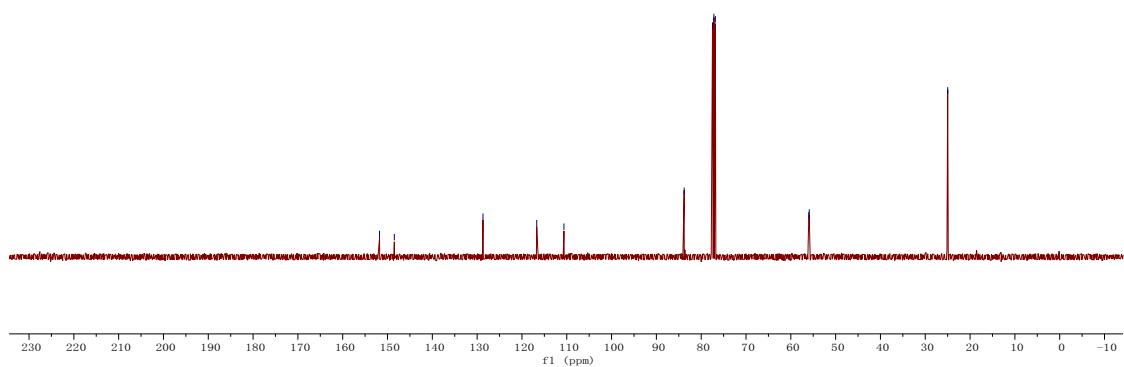

## 2-(4-(ethoxymethoxy)phenyl)-4,4,5,5-tetramethyl-1,3,2-dioxaborolane (48)

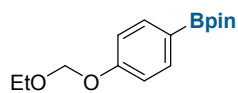

**Compound 48**  
<sup>1</sup>H NMR (400 MHz, CDCl<sub>3</sub>)

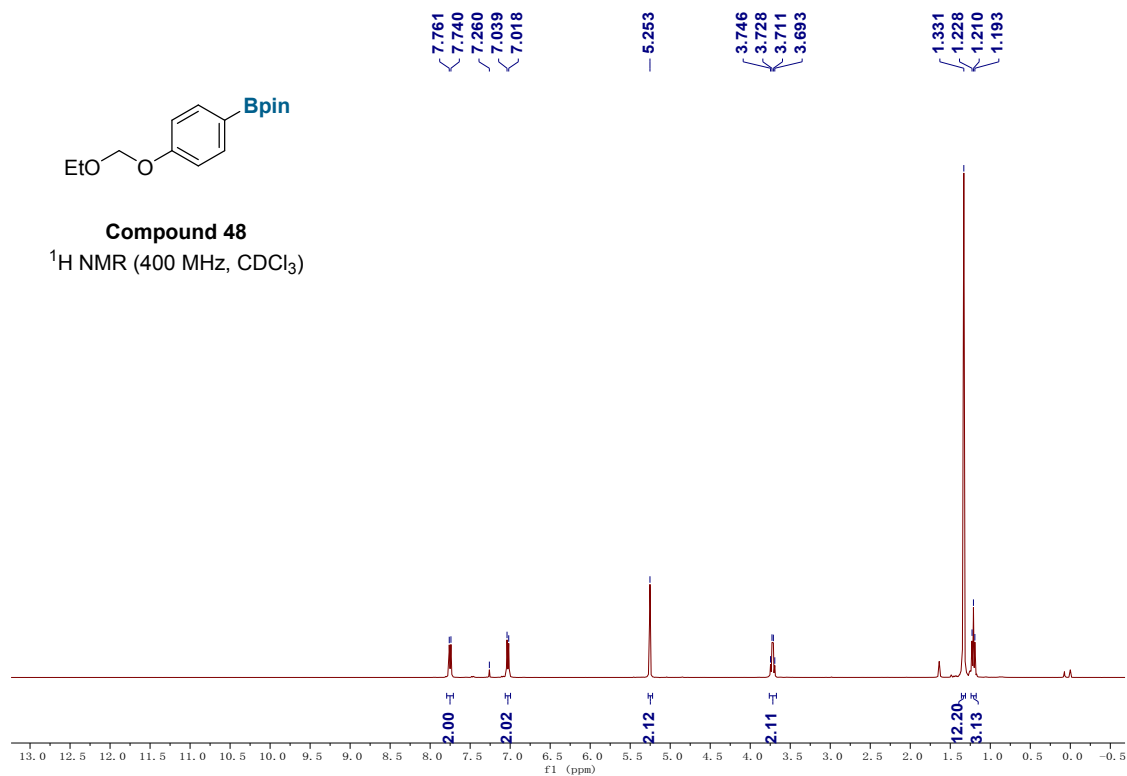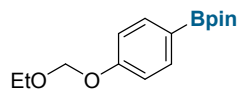

**Compound 48**  
<sup>13</sup>C NMR (100 MHz, CDCl<sub>3</sub>)

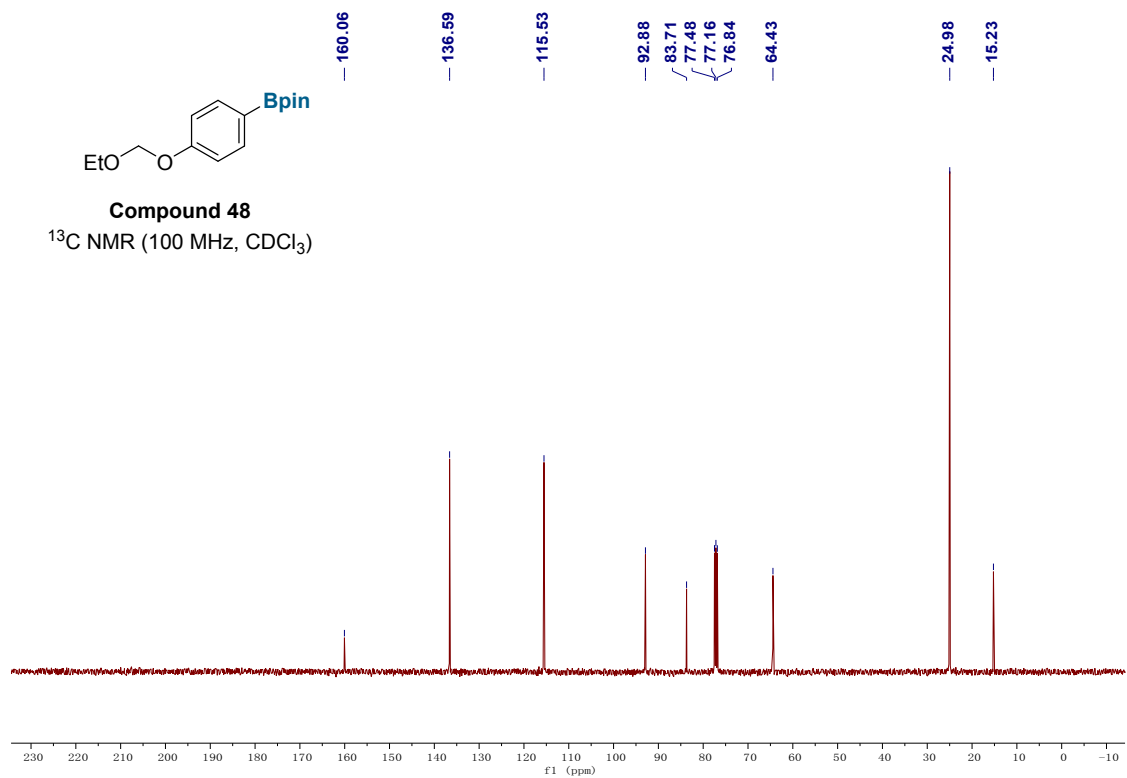



**2-(4-ethylpiperazin-1-yl)-4-(4-(triethylsilyl)phenyl)-5,6,7,8,9,10-hexahydrocycloocta[b]pyridine (49).**

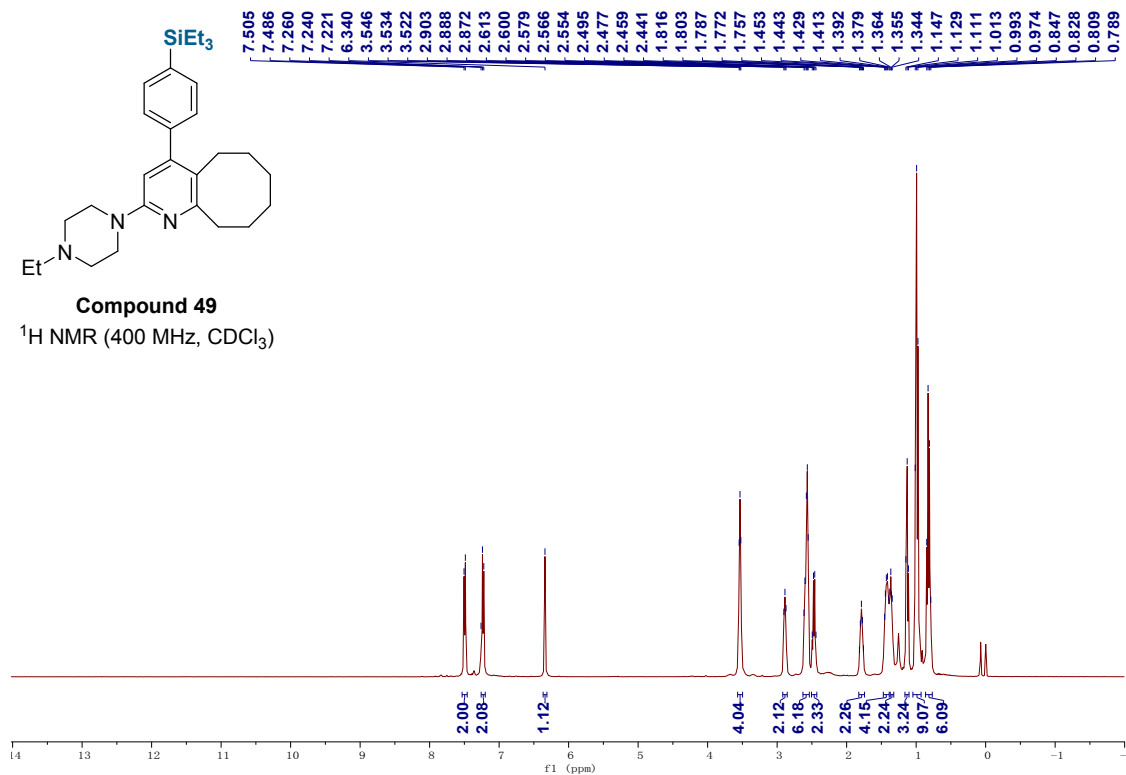

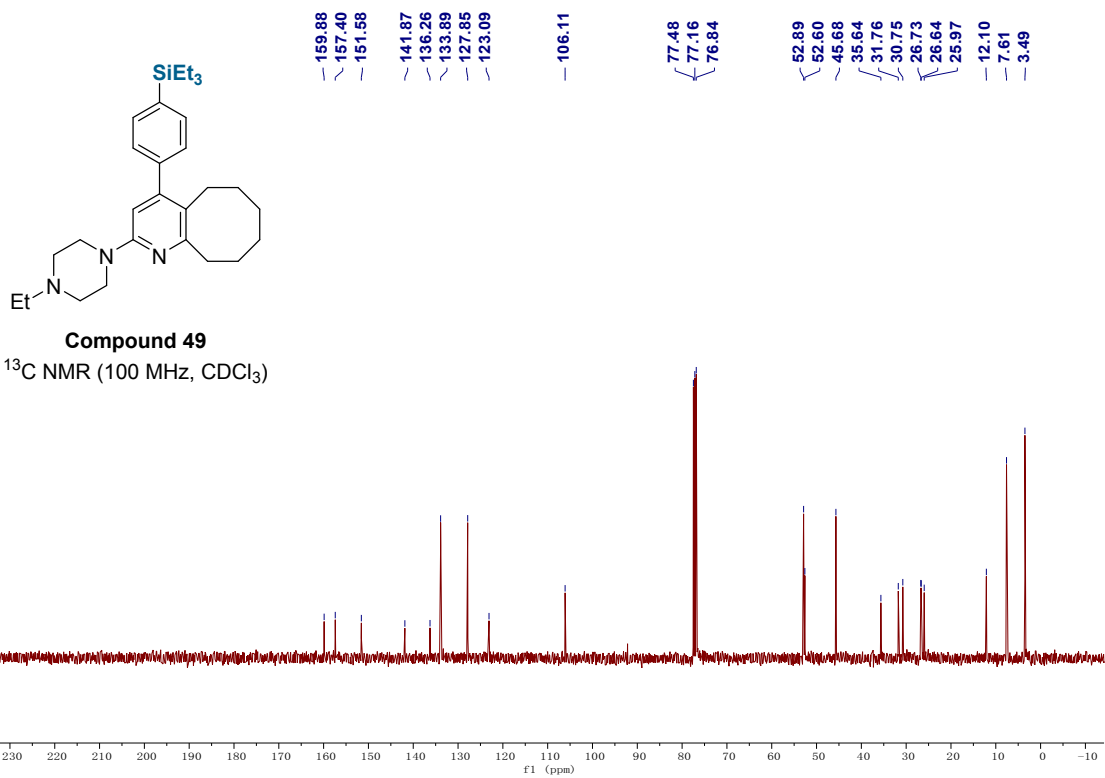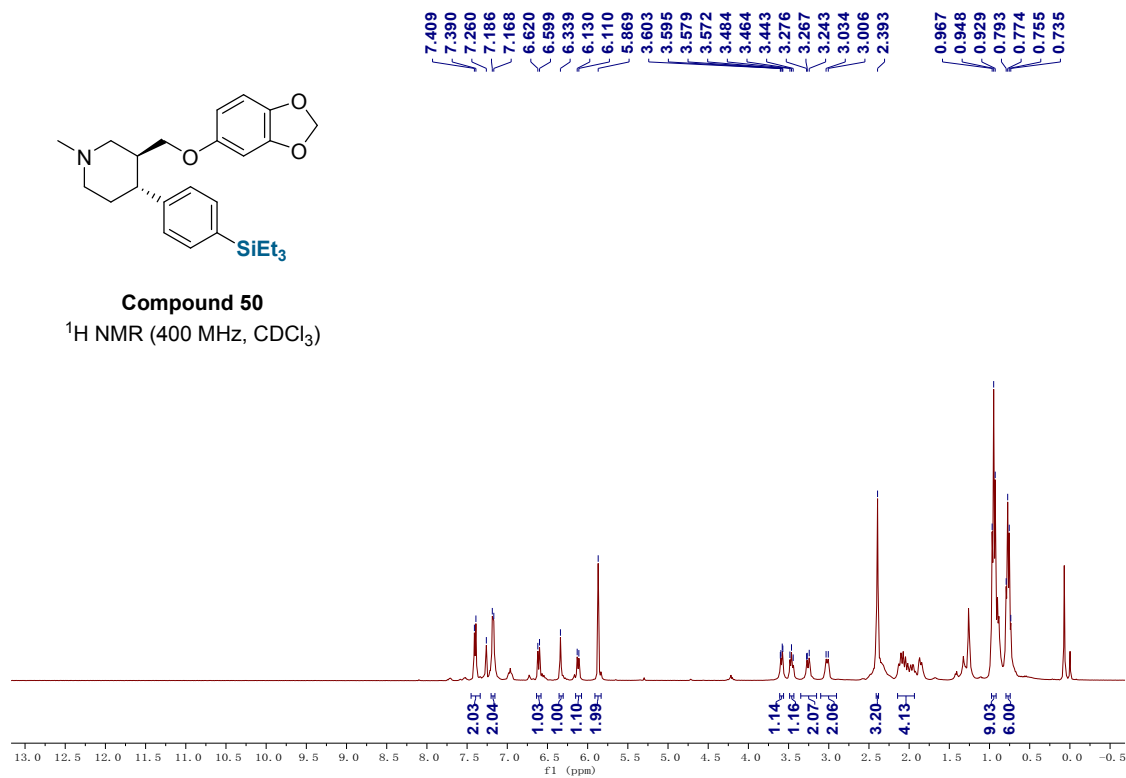

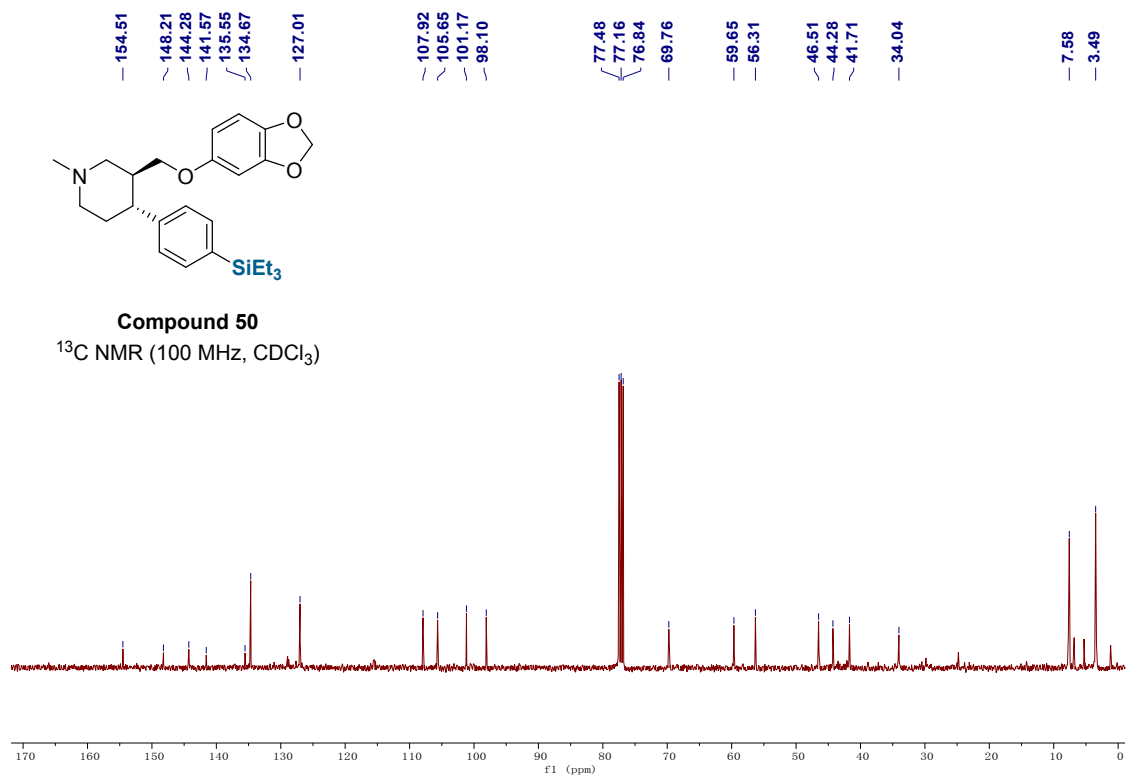

**Triethyl(2-phenyl-5-(4,4,5,5-tetramethyl-1,3,2-dioxaborolan-2-yl)pentyl)silane (52).**

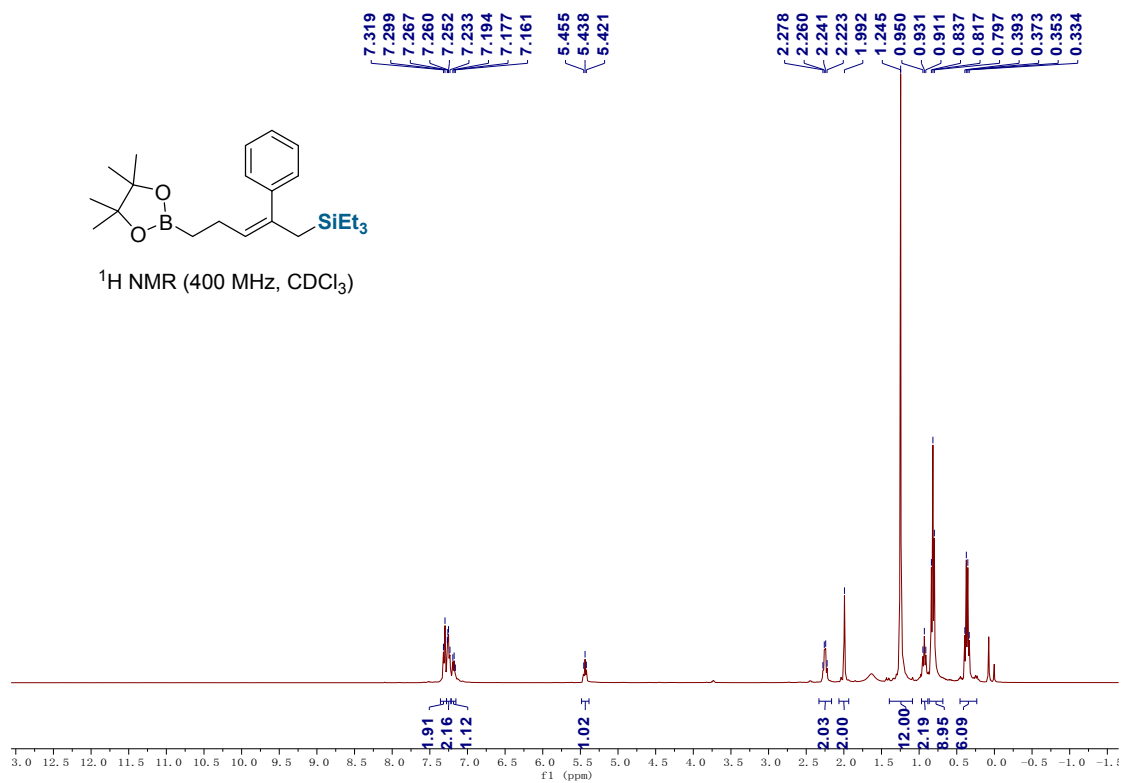

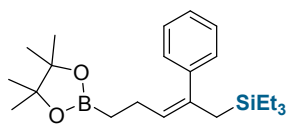

$^{13}\text{C}$  NMR (100 MHz,  $\text{CDCl}_3$ )

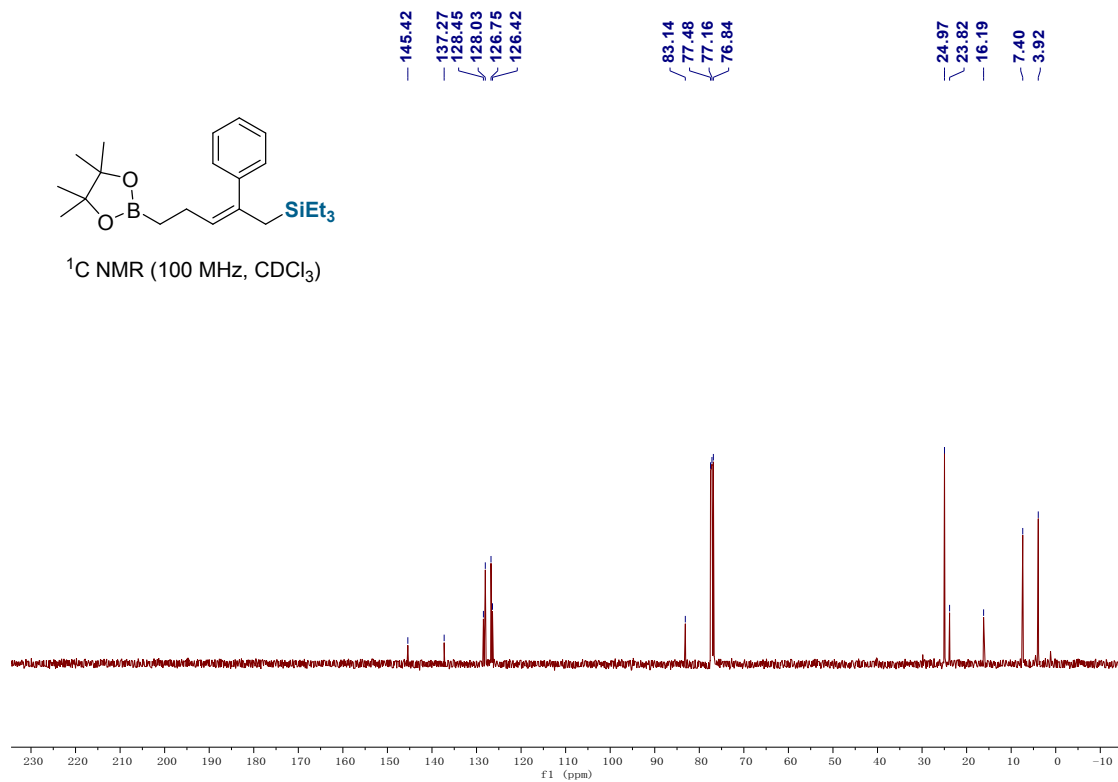

Supplement: d1qo00839k1.pdf [file d1qo00839k1.pdf]
